# Supplementary material for: Pyridine–borane complex-catalysed thioesterification: the direct conversion of carboxylic acids to thioesters
Source: Royal Society of Chemistry journal article supplement (doi:10.1039/d4cc01326c), 2024-01-01

## **Pyridine-borane complex catalysed thioesterification: the direct conversion of carboxylic acids into thioesters**

Ming-Chuan Wang, Xue-Ying Yang, Jian-Feng Zhou, Wan-Xuan Zhang,\* and Bin-Jie Li \*

College of Chemistry and Chemical Engineering, Hubei University, Wuhan 430062, People's Republic  
of China.

E-mail: [Zhangwx@hubu.edu.cn](mailto:Zhangwx@hubu.edu.cn), [Libinjie@hubu.edu.cn](mailto:Libinjie@hubu.edu.cn).

# Contents

|                                                                                  |           |
|----------------------------------------------------------------------------------|-----------|
| <b>1. General Information.....</b>                                               | <b>1</b>  |
| <b>2. Optimization Tables .....</b>                                              | <b>2</b>  |
| <b>3. Experimental Procedures .....</b>                                          | <b>4</b>  |
| 3.1 Experimental procedures for the synthesis of pyridine-borane complexes. .... | 4         |
| 3.2 Experimental procedures of thioesters.....                                   | 4         |
| 3.3 Experimental procedures of gram-scale reactions .....                        | 5         |
| 3.4 Unsuccessful examples. ....                                                  | 5         |
| <b>4. Characterization data of catalysts, thioesters and amide products.</b>     | <b>6</b>  |
| 4.1 Characterization data of pyridine-borane complexes. ....                     | 6         |
| 4.2 Characterization data of thioesters.....                                     | 8         |
| 4.3 Characterization data of amide. ....                                         | 17        |
| <b>5. References .....</b>                                                       | <b>18</b> |
| <b>6. NMR spectra .....</b>                                                      | <b>19</b> |

## 1. General Information

Unless otherwise noted, all manipulations were carried out under argon atmosphere.  $^{11}\text{B}$ ,  $^{13}\text{C}$   $^{19}\text{F}$  and  $^1\text{H}$  NMR spectra were recorded at ambient temperature, on a Bruker Avance III 400 MHz NMR with Autosampler. Spectral data is reported in ppm using solvents as the reference ( $\text{CDCl}_3$  at 7.26 ppm and DMSO at 2.50 ppm for  $^1\text{H}$  NMR/ $\text{CDCl}_3$  at 77.16 ppm, and DMSO at 39.52 ppm for  $^{13}\text{C}$  NMR). Spectral data is reported as:  $\delta$  value, multiplicity (s = singlet, d = doublet, t = triplet, q = quartet, m = multiplet, br = broad), coupling constant(s) in Hz and integration. The  $^{11}\text{B}$  NMR spectrum measured for the compound **3i** was hydrogen decoupled. All solvents for routine isolation of products were reagent-grade and were purchased from Sinopharm. The high-resolution mass spectra (HRMS) were measured on Bruker micrOTOF-II mass spectrometer by ESI using a positive electrospray ionization (ESI+). Measured values are reported to 4 decimal places of the calculated value. The calculated values are based on the most abundant isotope. Sodium borohydride was purchased from Sinopharm and used without further purification. All pyridines, thiols, thiophenols, carboxylic acids, benzylamine and ammonia-borane complex were purchased from Energy Chemical, Bidepharm and Aladdin and used without further purification. All reactions requiring heating were using an aluminum heating block except that the gram-scale reactions were heated in an oil bath.

## 2. Optimization Tables

**Table S1.** Survey of the catalysts for the synthesis of *S*-dodecyl benzothioate (**4a**).

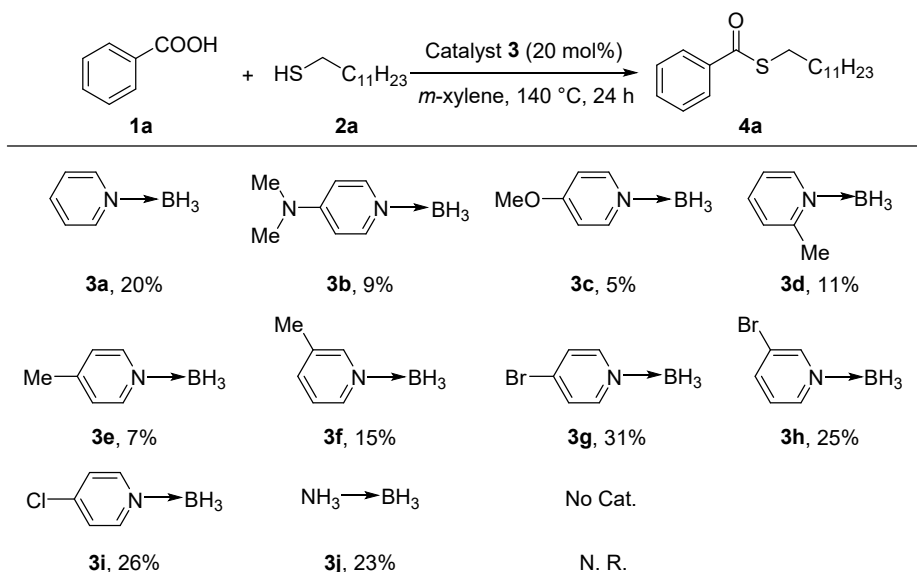

Reaction conditions: **1a** (2.0 mmol, 2.0 equiv), **2a** (1.0 mmol, 1.0 equiv), catalyst **3** (0.2 mmol, 20 mol%), *m*-xylene (2.0 mL), at 140 °C under argon, and yields reported are <sup>1</sup>H NMR yields and determined by using 1,3,5-trimethoxybenzene as an internal standard. N.R. = No reaction.

**Table S2.** Optimization of solvents and the effect of temperature.

Reaction scheme showing the synthesis of **4a** from **1a** and **2a** using Catalyst **3g** (20 mol%) in various solvents at different temperatures for 24 h.

| Entry | Solvent          | Temperature (°C) | Yield (%) |
|-------|------------------|------------------|-----------|
| 1     | <i>M</i> -xylene | 140              | 31        |
| 2     | Mesitylene       | 140              | 24        |
| 3     | DMSO             | 140              | 0         |
| 4     | DMF              | 140              | Trace     |
| 5     | <b>Dodecane</b>  | <b>140</b>       | <b>35</b> |
| 6     | Nitrobenzene     | 140              | 31        |
| 7     | <b>1,2-DCB</b>   | <b>140</b>       | <b>35</b> |
| 8     | <i>M</i> -xylene | 120              | 11        |
| 9     | 1,2-DCB          | 150              | 41        |

Reaction conditions: **1a** (2.0 mmol, 2.0 equiv), **2a** (1.0 mmol, 1.0 equiv), catalyst **3g** (0.2 mmol, 20 mol%), solvent (2.0 mL), under argon, and yields reported are <sup>1</sup>H NMR yields and determined by using 1,3,5-trimethoxybenzene as an internal standard. 1,2-DCB = 1,2-dichlorobenzene, DMF = *N,N*-dimethylformamide, DMSO = dimethyl sulfoxide.

**Table S3.** Dosage proportional and concentration optimization table for the synthesis of **4a**.

| Entry | <b>1a</b> (equiv) | <b>2a</b> (equiv) | V (mL)     | Concentration (M) | Yield (%) |
|-------|-------------------|-------------------|------------|-------------------|-----------|
| 1     | 1.0               | 1.0               | 2.0        | 0.5               | 17        |
| 2     | 1.0               | 2.0               | 2.0        | 0.5               | 20        |
| 3     | 2.0               | 1.0               | 2.0        | 0.5               | 35        |
| 4     | 3.0               | 1.0               | 2.0        | 0.5               | 22        |
| 5     | 4.0               | 1.0               | 2.0        | 0.5               | 30        |
| 6     | 2.0               | 1.0               | 4.0        | 0.25              | 18        |
| 7     | <b>2.0</b>        | <b>1.0</b>        | <b>1.0</b> | <b>1.0</b>        | <b>40</b> |
| 8     | 2.0               | 1.0               | 2.0        | 2.0               | 24        |

Reaction conditions: **1a**, **2a**, catalyst **3g** (0.2 mmol, 20 mol%), 1,2-DCB, at 140 °C, under argon, and yields reported are <sup>1</sup>H NMR yields and determined by using 1,3,5-trimethoxybenzene as an internal standard.

**Table S4.** Survey of the catalyst's loading amount for the synthesis of **4a** and effects of temperature.

| Entry | Temperature (°C) | X         | Yield (%)                  |
|-------|------------------|-----------|----------------------------|
| 1     | 140              | 20        | 40                         |
| 2     | <b>140</b>       | <b>50</b> | <b>74 (60)<sup>a</sup></b> |
| 3     | 140              | 40        | 46                         |
| 4     | 140              | 60        | 73                         |
| 5     | 140              | 80        | 77                         |
| 6     | 150              | 50        | 48                         |
| 7     | 140              | 100       | 74                         |

Reaction conditions: **1a** (2.0 mmol, 2.0 equiv), **2a** (1.0 mmol, 1.0 equiv), catalyst **3g** (0.2 mmol, 20 mol%), 1,2-DCB (1.0 mL), at 140 °C under argon, and yields reported are <sup>1</sup>H NMR yields and determined by using 1,3,5-trimethoxybenzene as an internal standard. <sup>a</sup>Isolated yield.

### 3. Experimental Procedures

#### 3.1 Experimental procedures for the synthesis of pyridine-borane complexes.

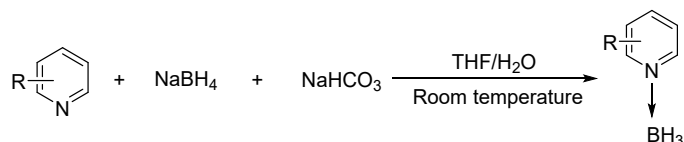

The pyridine-borane complexes were synthesized according to the reported procedure. [1a] Sodium borohydride (0.28 g, 7.5 mmol) and powdered sodium bicarbonate (1.26 g, 15 mmol) were added to a 50 mL dry round bottom flask. The corresponding pyridine was charged into the reaction flask followed by the addition of reagent-grade THF (1.9 mL for liquid pyridines) at ambient temperature. Under vigorous stirring, 1.9 mL of 14.4% v/v solution water in THF was added dropwise. The reaction was monitored by TLC. Upon completion (4 - 12 h), the reaction was filtered through sodium sulfate and celite and the solid residue was washed with 50 mL THF. Remove the solvent *in vacuo* and the residue was purified with flash chromatography with 200-300 mesh silica gel, eluting with petroleum, ether and ethyl acetate.

#### 3.2 Experimental procedures of thioesters.

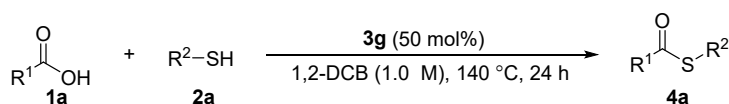

To a 25 mL Schlenk tube was added carboxylic acids (2.0 mmol), thiols or thiophenols (1.0 mmol), and pyridine-borane complex **3g** (0.5 mmol, 50 mol%) under argon atmosphere. Then 1,2-DCB was added into the tube (1.0 mL, 1.0 M with respect to thiols or thiophenols), and the reaction was then heated to 140 °C for 24 hours. When completed, the mixture was cooled to room temperature and extracted with ethyl acetate (10 mL × 3), then the combined organic layer was washed with brine and then dried over Na<sub>2</sub>SO<sub>4</sub>. Filtered and concentrated *in vacuo*. The residue was purified with flash chromatography with 200-300 mesh silica gel, eluting with petroleum ether and dichloromethane, to afford desired thioesters.

### 3.3 Experimental procedures of gram-scale reactions

To a 50 mL round-bottom flask, carboxylic acids (20.0 mmol), thiols (10.0 mmol), and pyridine-borane complex **3g** (5.0 mmol, 50 mol%) were added under argon atmosphere. Then 1,2-DCB was added into the flask (10.0 mL, 1.0 M with respect to thiols). The reaction was heated to 140 °C for 24 hours. When the reaction was completed, the reaction mixture was cooled to room temperature, then washed with water and extracted with ethyl acetate (20 mL × 3). The combined organic layer was washed with brine, and then dried over Na<sub>2</sub>SO<sub>4</sub>. Filtered and concentrated *in vacuo* and purified with 200-300 mesh silica gel, eluting with petroleum ether and dichloromethane, to afford desired thioesters.

### 3.4 Unsuccessful examples.

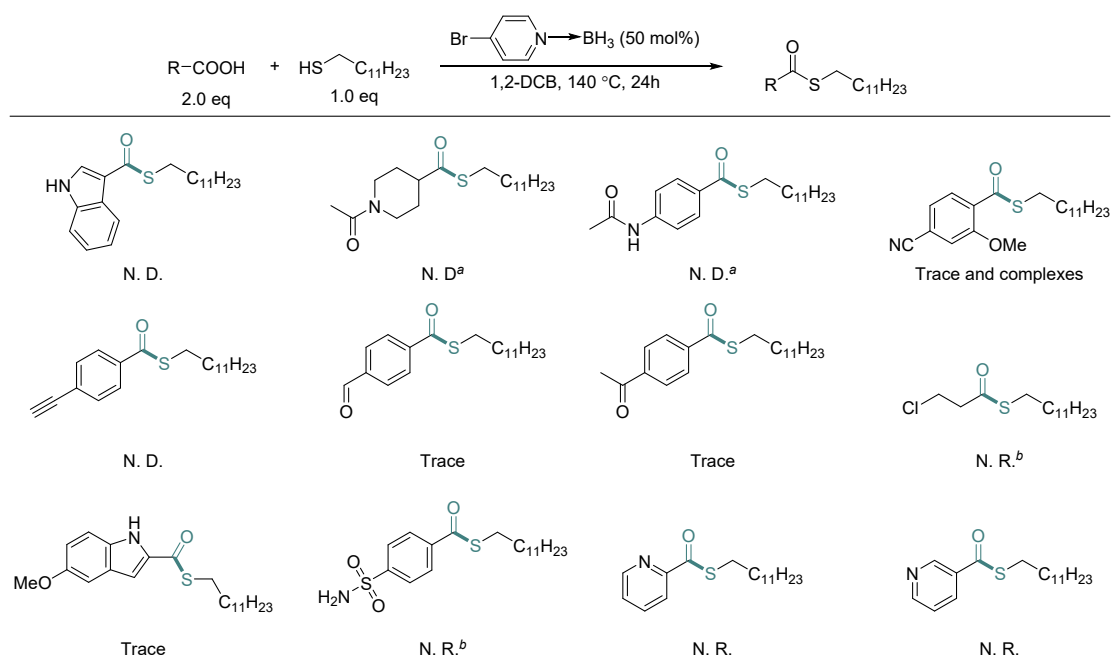

N. D. = Not detected. N. R. = No reaction. <sup>a</sup>*S*-dodecyl ethanethioate as the product was obtained, and yields < 10%. <sup>b</sup>Carboxylic acid could not dissolve in the solvent.

## 4. Characterization data of catalysts, thioesters and amide products

### 4.1 Characterization data of pyridine-borane complexes.

#### 3a Pyridine-Borane complex

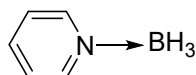

The title compound was isolated as a colorless oil.  $^1\text{H NMR}$  (400 MHz,  $\text{CDCl}_3$ )  $\delta$  9.03 – 8.28 (m, 2H), 7.93 (t,  $J = 7.7$  Hz, 1H), 7.58 – 7.37 (m, 2H), 2.59 (br, 3H).  $^{13}\text{C NMR}$  (101 MHz,  $\text{CDCl}_3$ )  $\delta$  147.5, 139.2, 125.4. Characterization is in agreement with previous reports for this compound. <sup>[1a]</sup>

#### 3b 4-Dimethylaminopyridine-Borane complex

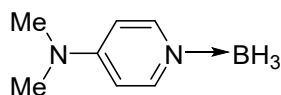

The title compound was isolated as a white solid.  $^1\text{H NMR}$  (400 MHz,  $\text{CDCl}_3$ )  $\delta$  8.05 (d,  $J = 7.3$  Hz, 2H), 6.48 (d,  $J = 7.5$  Hz, 2H), 3.09 (s, 6H), 2.86 – 1.97 (br, 3H).  $^{13}\text{C NMR}$  (101 MHz,  $\text{CDCl}_3$ )  $\delta$  154.7, 146.8, 106.5, 39.6. Characterization is in agreement with previous reports for this compound. <sup>[1a]</sup>

#### 3c 4-Methoxypyridine-Borane complex

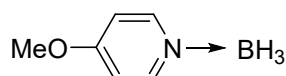

The title compound was isolated as a white solid.  $^1\text{H NMR}$  (400 MHz,  $\text{CDCl}_3$ )  $\delta$  8.39 (d,  $J = 7.0$  Hz, 2H), 6.92 (d,  $J = 7.2$  Hz, 2H), 3.94 (s, 3H), 2.95 – 2.10 (br, 3H).  $^{13}\text{C NMR}$  (101 MHz,  $\text{CDCl}_3$ )  $\delta$  167.4, 149.0, 111.0, 56.4. Characterization is in agreement with previous reports for this compound. <sup>[1c]</sup>

#### 3d 2-Methylpyridine-Borane complex

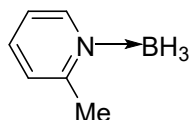

The title compound was isolated as a white solid.  $^1\text{H NMR}$  (400 MHz,  $\text{CDCl}_3$ )  $\delta$  8.74 (d,  $J = 5.7$  Hz, 1H), 7.81 (t,  $J = 7.7$  Hz, 1H), 7.37 (d,  $J = 7.8$  Hz, 1H), 7.29 (t,  $J = 6.7$  Hz, 1H), 2.76 (s, 3H), 2.83 – 2.12 (br, 3H).  $^{13}\text{C NMR}$  (101 MHz,  $\text{CDCl}_3$ )  $\delta$  157.9, 148.8, 139.6, 126.9, 122.5, 22.6. Characterization is in agreement with previous reports for this compound. <sup>[1a]</sup>

#### 3e 4-Methylpyridine-Borane complex

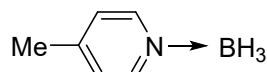

The title compound was isolated as a white solid.  $^1\text{H NMR}$  (400 MHz,  $\text{CDCl}_3$ )  $\delta$  8.43 (d,  $J = 6.3$  Hz, 2H), 7.29 (d,  $J = 6.1$  Hz, 2H), 2.48 (s, 3H), 3.03 – 2.09 (br, 3H).  $^{13}\text{C NMR}$  (101 MHz,  $\text{CDCl}_3$ )  $\delta$  151.6, 147.0, 126.1, 21.4. Characterization is in agreement with previous reports for this compound. <sup>[1c]</sup>



### 3f 3-Methylpyridine-Borane complex

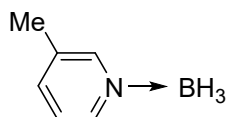

The title compound was isolated as a colorless oil. <sup>1</sup>H NMR (400 MHz, CDCl<sub>3</sub>) δ 8.44 – 8.25 (m, 2H), 7.70 (d, *J* = 7.9 Hz, 1H), 7.37 (dd, *J* = 7.8, 5.7 Hz, 1H), 3.05 – 2.04 (br, 3H), 2.36 (s, 3H). <sup>13</sup>C NMR (101 MHz, CDCl<sub>3</sub>) δ 147.4, 144.5, 139.7, 135.8, 124.9, 18.4. Characterization is in agreement with previous reports for this compound. [1c]

### 3g 4-Bromopyridine-Borane complex

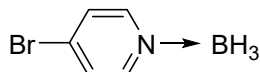

The title compound was isolated as a white solid. <sup>1</sup>H NMR (400 MHz, CDCl<sub>3</sub>) δ 8.43 (d, *J* = 6.4 Hz, 2H), 7.67 (d, *J* = 6.8 Hz, 2H), 3.02–1.94 (br, 3H). <sup>13</sup>C NMR (101 MHz, CDCl<sub>3</sub>) δ 148.3, 136.6, 129.1. Characterization is in agreement with previous reports for this compound. [1c]

### 3h 3-Bromopyridine-Borane complex

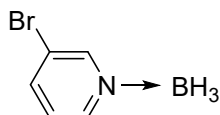

The title compound was isolated as a white solid. <sup>1</sup>H NMR (400 MHz, CDCl<sub>3</sub>) δ 8.76 (s, 1H), 8.57 (d, *J* = 5.6 Hz, 1H), 8.07 (d, *J* = 8.2 Hz, 1H), 7.42 (dd, *J* = 8.2, 5.7 Hz, 1H), 3.09 – 2.09 (3H, br). <sup>13</sup>C NMR (101 MHz, CDCl<sub>3</sub>) δ 149.2, 146.1, 142.0, 126.2, 121.2. Characterization is in agreement with previous reports for this compound. [1c]

### 3i 4-Chloropyridine-Borane complex

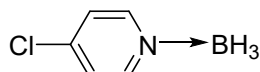

The title compound was isolated as a white solid. <sup>1</sup>H NMR (400 MHz, CDCl<sub>3</sub>) δ 8.53 (d, *J* = 6.4 Hz, 2H), 7.50 (d, *J* = 6.9 Hz, 2H), 2.99 – 2.14 (m, 3H). <sup>13</sup>C NMR (101 MHz, CDCl<sub>3</sub>) δ 148.5, 147.8, 126.0. <sup>11</sup>B NMR (128 MHz, CDCl<sub>3</sub>) δ -12.03. HRMS (ESI) *m/z*: calculated for C<sub>5</sub>H<sub>7</sub>BBrN[Na]<sup>+</sup>: 149.0253; found: 149.0255.

## 4.2 Characterization data of thioesters.

### 4a *S*-dodecyl benzothioate

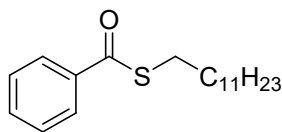

The title compound was isolated as a colorless oil (184 mg, 60% yield),  $^1\text{H NMR}$  (400 MHz,  $\text{CDCl}_3$ )  $\delta$  7.97 (dd,  $J = 8.3, 1.2$  Hz, 2H), 7.56 (t,  $J = 7.4$  Hz, 1H), 7.44 (t,  $J = 7.7$  Hz, 2H), 3.07 (t,  $J = 7.4$  Hz, 2H), 1.67 (m, 2H), 1.46 – 1.38 (m, 2H), 1.33 – 1.22 (m, 16H), 0.88 (t,  $J = 6.8$  Hz, 3H).  $^{13}\text{C NMR}$  (101 MHz,  $\text{CDCl}_3$ )  $\delta$  192.3, 137.4, 133.3, 128.7, 127.3, 32.1, 29.8, 29.8, 29.7, 29.7, 29.6, 29.5, 29.3, 29.2, 29.1, 22.8, 14.3. Characterization is in agreement with previous reports for this compound. <sup>[2a]</sup>

### 4b *S*-dodecyl 4-methylbenzothioate

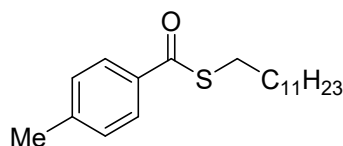

The title compound was isolated as a colorless oil (199 mg, 62% yield),  $^1\text{H NMR}$  (400 MHz,  $\text{CDCl}_3$ )  $\delta$  7.87 (d,  $J = 8.2$  Hz, 2H), 7.23 (d,  $J = 8.0$  Hz, 2H), 3.05 (t,  $J = 7.4$  Hz, 2H), 2.40 (s, 3H), 1.66 (p,  $J = 7.4$  Hz, 2H), 1.42 (p,  $J = 6.8$  Hz, 2H), 1.32 – 1.22 (m, 16H), 0.88 (t,  $J = 6.9$  Hz, 3H).  $^{13}\text{C NMR}$  (101 MHz,  $\text{CDCl}_3$ )  $\delta$  191.9, 144.1, 134.9, 129.3, 127.4, 32.1, 29.8, 29.8, 29.8, 29.7, 29.6, 29.5, 29.3, 29.1, 22.8, 21.8, 14.3. Characterization is in agreement with previous reports for this compound. <sup>[2b]</sup>

### 4c *S*-dodecyl 2-methylbenzothioate

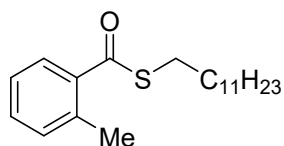

The title compound was isolated as a colorless oil (237 mg, 74% yield),  $^1\text{H NMR}$  (400 MHz,  $\text{CDCl}_3$ )  $\delta$  7.80 – 7.72 (m, 1H), 7.40 – 7.31 (m, 1H), 7.22 (t,  $J = 7.1$  Hz, 2H), 3.02 (t,  $J = 7.4$  Hz, 2H), 2.47 (s, 3H), 1.66 (p,  $J = 7.4$  Hz, 2H), 1.42 (p,  $J = 6.7$  Hz, 2H), 1.32 – 1.22 (m, 16H), 0.88 (t,  $J = 6.8$  Hz, 3H).  $^{13}\text{C NMR}$  (101 MHz,  $\text{CDCl}_3$ )  $\delta$  194.7, 138.0, 136.7, 131.6, 131.5, 128.5, 125.8, 32.1, 29.8, 29.8, 29.7, 29.7, 29.5, 29.3, 29.1, 22.8, 20.7, 14.3. Characterization is in agreement with previous reports for this compound. <sup>[2b]</sup>

### 4d *S*-dodecyl 2,6-dimethylbenzothioate

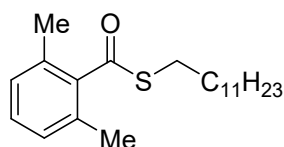

The title compound was isolated as a colorless oil (261 mg, 78% yield),  $^1\text{H NMR}$  (400 MHz,  $\text{CDCl}_3$ )  $\delta$  7.18 (t,  $J = 7.6$  Hz, 1H), 7.02 (d,  $J = 7.6$  Hz, 2H), 3.07 (t,  $J = 7.3$  Hz, 2H), 2.33 (s, 6H), 1.70 (p,  $J = 7.4$  Hz, 2H), 1.44 (p,  $J = 6.7$  Hz, 2H), 1.35 – 1.25 (m, 16H), 0.90 (t,  $J = 6.8$  Hz, 3H).  $^{13}\text{C NMR}$  (101 MHz,

$\text{CDCl}_3$ )  $\delta$  198.0, 140.6, 133.7, 129.3, 127.7, 32.1, 29.8, 29.7, 29.6, 29.6, 29.5, 29.3, 29.0, 22.8, 19.1, 14.2. **HRMS (ESI)**  $m/z$ : calculated for  $\text{C}_{21}\text{H}_{34}\text{OS}[\text{H}]^+$ : 335.2404; found: 335.2409.

**4e** *S*-dodecyl 4-methoxybenzothioate

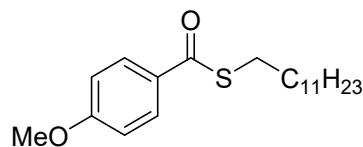

The title compound was isolated as a colorless oil (281 mg, 83% yield),  $^1\text{H NMR}$  (400 MHz,  $\text{CDCl}_3$ )  $\delta$  7.95 (d,  $J = 8.5$  Hz, 2H), 6.91 (d,  $J = 8.5$  Hz, 2H), 3.85 (s, 3H), 3.04 (t,  $J = 7.4$  Hz, 2H), 1.65 (p,  $J = 7.5$  Hz, 2H), 1.40 (q,  $J = 7.3, 6.3$  Hz, 2H), 1.32 – 1.22 (m, 16H), 0.88 (t,  $J = 6.7$  Hz, 3H).  $^{13}\text{C NMR}$  (101 MHz,  $\text{CDCl}_3$ )  $\delta$  190.8, 163.7, 130.3, 129.4, 113.8, 55.6, 32.1, 29.8, 29.8, 29.7, 29.7, 29.7, 29.5, 29.3, 29.1, 29.1, 22.8, 14.3. Characterization is in agreement with previous reports for this compound. [2c]

**4f** *S*-dodecyl [1,1'-biphenyl]-4-carbothioate

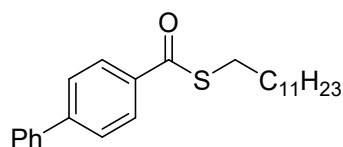

The title compound was isolated as a white solid (233 mg, 61% yield),  $^1\text{H NMR}$  (400 MHz,  $\text{CDCl}_3$ )  $\delta$  8.04 (d,  $J = 8.5$  Hz, 2H), 7.67 (d,  $J = 8.5$  Hz, 2H), 7.62 (d,  $J = 7.1$  Hz, 2H), 7.47 (t,  $J = 7.4$  Hz, 2H), 7.40 (t,  $J = 7.3$  Hz, 1H), 3.09 (t,  $J = 7.4$  Hz, 2H), 1.69 (p,  $J = 7.4$  Hz, 2H), 1.44 (p,  $J = 6.7$  Hz, 2H), 1.32 – 1.22 (s, 16H), 0.88 (t,  $J = 6.8$  Hz, 3H).  $^{13}\text{C NMR}$  (101 MHz,  $\text{CDCl}_3$ )  $\delta$  191.8, 146.1, 134.0, 136.1, 129.1, 128.3, 127.9, 127.4, 127.3, 32.1, 29.8, 29.8, 29.7, 29.7, 29.5, 29.3, 29.2, 29.1, 22.8, 14.3. Characterization is in agreement with previous reports for this compound. [2d]

**4g** *S*-dodecyl 2-fluorobenzothioate

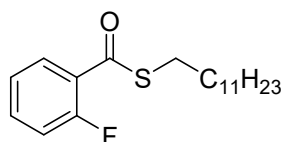

The title compound was isolated as a yellow oil (193 mg, 59% yield),  $^1\text{H NMR}$  (400 MHz,  $\text{CDCl}_3$ )  $\delta$  7.85 (td,  $J = 7.6, 1.8$  Hz, 1H), 7.49 (dddd,  $J = 8.3, 7.2, 5.0, 1.8$  Hz, 1H), 7.20 (td,  $J = 7.7, 1.0$  Hz, 1H), 7.13 (ddd,  $J = 10.7, 8.3, 0.9$  Hz, 1H), 3.06 (t,  $J = 7.4$  Hz, 2H), 1.77 – 1.59 (m, 2H), 1.42 (p,  $J = 6.8$  Hz, 2H), 1.33 – 1.22 (m, 16H), 0.87 (t,  $J = 6.8$  Hz, 3H).  $^{13}\text{C NMR}$  (101 MHz,  $\text{CDCl}_3$ )  $\delta$  189.1 (d,  $J = 4.6$  Hz), 160.4 (d,  $J = 257.7$  Hz), 134.2 (d,  $J = 8.8$  Hz), 129.8 (d,  $J = 1.4$  Hz), 126.0 (d,  $J = 11.3$  Hz), 124.2 (d,  $J = 3.5$  Hz), 117.0 (d,  $J = 22.4$  Hz), 32.0, 29.8, 29.7, 29.6, 29.5, 29.5, 29.4, 29.3, 29.1, 22.8, 14.2.  $^{19}\text{F NMR}$  (377 MHz,  $\text{CDCl}_3$ )  $\delta$  -111.00 (ddd,  $J = 11.1, 6.9, 4.3$  Hz). **HRMS (ESI)**  $m/z$ : calculated for  $\text{C}_{19}\text{H}_{29}\text{FOS}[\text{H}]^+$ : 325.1996; found: 325.1990.

#### 4h *S*-dodecyl 4-iodobenzothioate

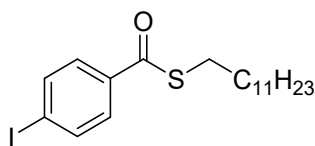

The title compound was isolated as a white solid (208 mg, 48% yield),  $^1\text{H NMR}$  (400 MHz,  $\text{CDCl}_3$ )  $\delta$  7.79 (d,  $J = 8.5$  Hz, 2H), 7.67 (d,  $J = 8.5$  Hz, 2H), 3.05 (t,  $J = 7.4$  Hz, 2H), 1.65 (p,  $J = 7.4$  Hz, 2H), 1.46 – 1.34 (m, 2H), 1.32 – 1.22 (s, 16H), 0.87 (t,  $J = 6.8$  Hz, 3H).  $^{13}\text{C NMR}$  (101 MHz,  $\text{CDCl}_3$ )  $\delta$  191.5, 137.9, 136.7, 128.6, 101.0, 32.0, 29.8, 29.7, 29.6, 29.6, 29.5, 29.3, 29.0, 22.8, 14.3. Characterization is in agreement with previous reports for this compound. <sup>[2e]</sup>

#### 4i *S*-dodecyl 4-bromobenzothioate

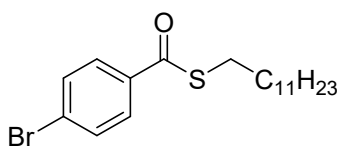

The title compound was isolated as a yellow oil (160 mg, 42% yield),  $^1\text{H NMR}$  (400 MHz,  $\text{CDCl}_3$ )  $\delta$  7.83 (d,  $J = 8.1$  Hz, 2H), 7.58 (d,  $J = 8.2$  Hz, 2H), 3.06 (t,  $J = 7.4$  Hz, 2H), 1.66 (p,  $J = 7.4$  Hz, 2H), 1.40 (q,  $J = 7.2$  Hz, 2H), 1.33–1.22 (m, 16H), 0.88 (t,  $J = 6.7$  Hz, 3H).  $^{13}\text{C NMR}$  (101 MHz,  $\text{CDCl}_3$ )  $\delta$  191.3, 136.2, 132.0, 128.8, 128.3, 32.1, 29.8, 29.7, 29.6, 29.6, 29.5, 29.3, 29.3, 29.1, 22.8, 14.3. Characterization is in agreement with previous reports for this compound. <sup>[2e]</sup>

#### 4j *S*-dodecyl 4-(trifluoromethyl)benzothioate

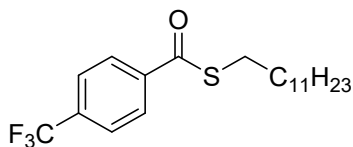

The title compound was isolated as a yellow oil (153 mg, 41% yield),  $^1\text{H NMR}$  (400 MHz,  $\text{CDCl}_3$ )  $\delta$  8.07 (d,  $J = 8.1$  Hz, 2H), 7.71 (d,  $J = 8.2$  Hz, 2H), 3.10 (t,  $J = 7.3$  Hz, 2H), 1.69 (p,  $J = 7.4$  Hz, 2H), 1.49 – 1.38 (m, 2H), 1.31 – 1.22 (m, 16H), 0.88 (t,  $J = 6.7$  Hz, 3H).  $^{13}\text{C NMR}$  (101 MHz,  $\text{CDCl}_3$ )  $\delta$  191.3, 140.1, 134.7 (q,  $J = 32.7$  Hz), 127.6, 125.8 (q,  $J = 3.7$  Hz), 123.7 (d,  $J = 272.6$  Hz), 32.1, 29.9, 29.8, 29.7, 29.7, 29.6, 29.5, 29.5, 29.3, 29.1, 22.8, 14.2. Characterization is in agreement with previous reports for this compound. <sup>[2e]</sup>

#### 4k *S*-dodecyl 4-nitrobenzothioate

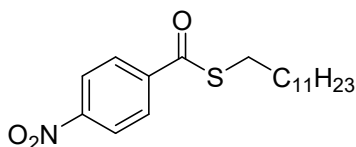

The title compound was isolated as a white solid (107 mg, 30% yield),  $^1\text{H NMR}$  (400 MHz,  $\text{CDCl}_3$ )  $\delta$  8.29 (d,  $J = 8.8$  Hz, 2H), 8.11 (d,  $J = 8.9$  Hz, 2H), 3.11 (t,  $J = 7.3$  Hz, 2H), 1.69 (p,  $J = 7.4$  Hz, 2H), 1.42 (dt,  $J = 14.6, 6.7$  Hz, 2H), 1.31–1.25 (br, 16H), 0.87 (t,  $J = 6.8$  Hz, 3H).  $^{13}\text{C NMR}$  (101 MHz,  $\text{CDCl}_3$ )  $\delta$  190.8, 150.6, 142.0, 128.3, 124.0, 32.0, 29.8, 29.7, 29.6, 29.5, 29.4, 29.2, 29.0, 22.8, 14.3. Characterization is in agreement with previous reports for this compound. <sup>[2p]</sup>

**4l** methyl 4-((dodecylthio)carbonyl)benzoate

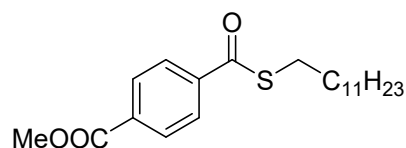

The title compound was isolated as a white solid (179 mg, 49% yield),  $^1\text{H NMR}$  (400 MHz,  $\text{CDCl}_3$ )  $\delta$  8.10 (d,  $J = 8.4$  Hz, 2H), 8.01 (d,  $J = 8.5$  Hz, 2H), 3.95 (s, 3H), 3.09 (t,  $J = 7.3$  Hz, 2H), 1.68 (p,  $J = 7.3$  Hz, 2H), 1.42 (p,  $J = 6.9$  Hz, 2H), 1.36 – 1.25 (m, 16H), 0.87 (t,  $J = 6.8$  Hz, 3H).  $^{13}\text{C NMR}$  (101 MHz,  $\text{CDCl}_3$ )  $\delta$  191.8, 166.3, 140.7, 134.1, 130.0, 127.2, 52.6, 32.1, 29.8, 29.8, 29.7, 29.6, 29.6, 29.5, 29.5, 29.3, 29.1, 22.8, 14.3. Characterization is in agreement with previous reports for this compound. <sup>[2q]</sup>

**4o** *S*-dodecyl furan-2-carbothioate

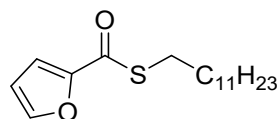

The title compound was isolated as a yellow oil (160 mg, 54% yield),  $^1\text{H NMR}$  (400 MHz,  $\text{CDCl}_3$ )  $\delta$  7.60 – 7.46 (m, 1H), 7.15 (d,  $J = 3.4$  Hz, 1H), 6.50 (dd,  $J = 3.6, 1.7$  Hz, 1H), 3.03 (t,  $J = 7.3$  Hz, 2H), 1.64 (p,  $J = 7.4$  Hz, 2H), 1.39 (p,  $J = 6.7$  Hz, 2H), 1.32 – 1.22 (m, 16H), 0.86 (t,  $J = 6.8$  Hz, 3H).  $^{13}\text{C NMR}$  (101 MHz,  $\text{CDCl}_3$ )  $\delta$  180.8, 151.2, 146.0, 115.3, 112.2, 32.0, 29.7, 29.7, 29.6, 29.4, 29.2, 29.0, 28.2, 22.8, 14.2. Characterization is in agreement with previous reports for this compound. <sup>[2c]</sup>

**4p** *S*-dodecyl benzofuran-3-carbothioate

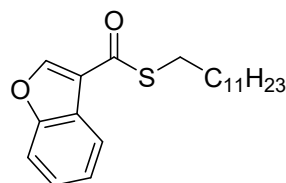

The title compound was isolated as a white solid (216 mg, 62% yield),  $^1\text{H NMR}$  (400 MHz,  $\text{CDCl}_3$ )  $\delta$  7.69 (d,  $J = 7.8$  Hz, 1H), 7.58 (dd,  $J = 8.5, 1.0$  Hz, 1H), 7.51 (d,  $J = 1.0$  Hz, 1H), 7.46 (ddd,  $J = 8.5, 7.2, 1.3$  Hz, 1H), 7.33 – 7.27 (m, 1H), 3.11 (t,  $J = 7.3$  Hz, 2H), 1.69 (p,  $J = 7.4$  Hz, 2H), 1.43 (p,  $J = 6.8$  Hz, 2H), 1.38 – 1.26 (m, 16H), 0.88 (t,  $J = 6.8$  Hz, 3H).  $^{13}\text{C NMR}$  (101 MHz,  $\text{CDCl}_3$ )  $\delta$  182.6, 155.5, 151.5, 128.1, 127.1, 124.1, 123.2, 112.5, 111.0, 32.0, 29.8, 29.8, 29.7, 29.6, 29.6, 29.5, 29.3, 29.0, 28.6, 22.8, 14.3. **HRMS (ESI)**  $m/z$ : calculated for  $\text{C}_{21}\text{H}_{30}\text{O}_2\text{S}[\text{H}]^+$ : 347.2040; found: 347.2039.

**4q** *S*-dodecyl chromane-2-carbothioate

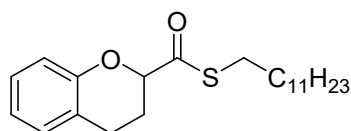

The title compound was isolated as a white solid (219 mg, 60% yield),  $^1\text{H NMR}$  (400 MHz,  $\text{CDCl}_3$ )  $\delta$  7.15 (t,  $J = 7.7$  Hz, 1H), 7.04 (d,  $J = 6.0$  Hz, 1H), 6.96 (d,  $J = 7.1$  Hz, 1H), 6.89 (t,  $J = 7.4$  Hz, 1H), 4.72 (dd,  $J = 6.8, 4.3$  Hz, 1H), 2.96 – 2.81 (m, 2H), 2.80 – 2.74 (m, 2H), 2.30 – 2.15 (m, 2H), 1.64 – 1.51 (m, 2H), 1.38 – 1.26 (m, 18H), 0.89 (t,  $J = 6.8$  Hz, 3H).  $^{13}\text{C NMR}$  (101 MHz,  $\text{CDCl}_3$ )  $\delta$  201.9, 153.2, 129.6, 127.8, 121.8, 121.1, 117.0, 80.3, 32.0, 29.8, 29.8, 29.7, 29.6, 29.5, 29.4, 29.2, 29.0, 28.4, 25.0, 23.0, 22.8,

14.3. **HRMS (ESI)**  $m/z$ : calculated for  $C_{22}H_{34}O_2S[K]^+$ : 385.2172; found: 385.2161.

**4r** *S*-dodecyl benzo[*b*]thiophene-3-carbothioate

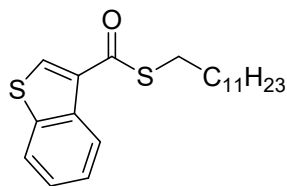

The title compound was isolated as a yellow oil (298 mg, 55% yield),  $^1H$  NMR (400 MHz,  $CDCl_3$ )  $\delta$  8.58 (d,  $J = 8.1$  Hz, 1H), 8.39 (s, 1H), 7.85 (d,  $J = 8.1$  Hz, 1H), 7.52 – 7.45 (m, 1H), 7.45 – 7.37 (m, 1H), 3.10 (t,  $J = 7.4$ , 2H), 1.71 (p,  $J = 7.4$  Hz, 2H), 1.45 (p,  $J = 6.7$  Hz, 2H), 1.35 – 1.25 (m, 16H), 0.90 (t,  $J = 6.8$  Hz, 3H).  $^{13}C$  NMR (101 MHz,  $CDCl_3$ )  $\delta$  186.4, 140.0, 135.9, 135.1, 135.0, 125.9, 125.6, 125.0, 122.5, 32.1, 29.9, 29.8, 29.8, 29.7, 29.7, 29.5, 29.3, 29.1, 29.1, 22.8, 14.3. **HRMS (ESI)**  $m/z$ : calculated for  $C_{21}H_{30}OS_2[Na]^+$ : 385.1631; found: 385.1631.

**4s** *S*-dodecyl 1-methyl-1H-pyrrole-3-carbothioate

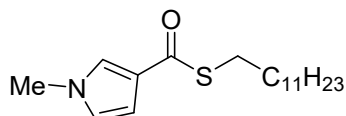

The title compound was isolated as a white solid (107 mg, 35% yield),  $^1H$  NMR (400 MHz,  $CDCl_3$ )  $\delta$  7.07 (dd,  $J = 4.1, 1.7$  Hz, 1H), 6.78 (t,  $J = 2.1$  Hz, 1H), 6.10 (dd,  $J = 4.1, 2.5$  Hz, 1H), 3.90 (s, 3H), 2.96 (t,  $J = 7.3$  Hz, 2H), 1.63 (p,  $J = 6.8$  Hz, 2H), 1.39 (q,  $J = 6.5, 5.7$  Hz, 2H), 1.38 – 1.26 (m, 16H), 0.88 (t,  $J = 6.8$  Hz, 3H).  $^{13}C$  NMR (101 MHz,  $CDCl_3$ )  $\delta$  182.3, 130.2, 129.7, 118.1, 108.4, 37.2, 32.0, 30.1, 29.8, 29.8, 29.7, 29.7, 29.5, 29.3, 29.1, 28.4, 22.8, 14.3. **HRMS (ESI)**  $m/z$ : calculated for  $C_{18}H_{31}NOS[H]^+$ : 310.2200; found: 310.2199.

**4t** *S*-dodecyl 1-methyl-1H-indole-3-carbothioate

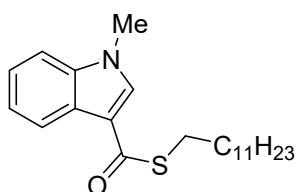

The title compound was isolated as a yellow solid (204 mg, 57% yield),  $^1H$  NMR (400 MHz,  $CDCl_3$ )  $\delta$  8.32 – 8.21 (m, 1H), 7.85 (s, 1H), 7.39 – 7.26 (m, 3H), 3.83 (s, 3H), 3.08 (t,  $J = 7.4$  Hz, 2H), 1.79 – 1.60 (m, 2H), 1.44 (p,  $J = 6.6$  Hz, 2H), 1.34 – 1.26 (m, 16H), 0.88 (t,  $J = 6.8$  Hz, 3H).  $^{13}C$  NMR (101 MHz,  $CDCl_3$ )  $\delta$  185.0, 137.4, 134.3, 125.6, 123.4, 122.6, 122.2, 116.0, 109.9, 33.7, 32.1, 30.3, 29.8, 29.8, 29.7, 29.7, 29.5, 29.4, 29.1, 28.3, 22.8, 14.3. **HRMS (ESI)**  $m/z$ : calculated for  $C_{22}H_{33}NOS[H]^+$ : 360.2356; found: 360.2338.

**4u** *S*-dodecyl 2-(naphthalen-1-yl)ethanethioate

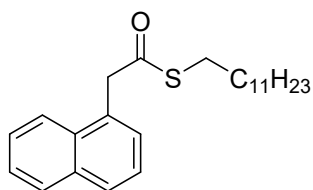

The title compound was isolated as a colorless oil (266 mg, 71% yield),  $^1\text{H NMR}$  (400 MHz,  $\text{CDCl}_3$ )  $\delta$  7.98 (d,  $J = 8.3$  Hz, 1H), 7.90 – 7.85 (m, 1H), 7.82 (dd,  $J = 6.4, 3.1$  Hz, 1H), 7.57 – 7.47 (m, 2H), 7.44 (q,  $J = 3.5$  Hz, 2H), 4.28 (s, 2H), 2.94 – 2.65 (m, 2H), 1.51 (p,  $J = 7.3$  Hz, 2H), 1.32 – 1.22 (d,  $J = 8.51$  Hz, 18H), 0.88 (t,  $J = 6.9$  Hz, 3H).  $^{13}\text{C NMR}$  (101 MHz,  $\text{CDCl}_3$ )  $\delta$  198.0, 134.0, 132.3, 130.4, 128.9, 128.9, 128.5, 126.6, 126.0, 125.6, 124.1, 48.5, 32.1, 29.8, 29.68, 29.6, 29.5, 29.4, 29.2, 28.9, 22.8, 14.3. Characterization is in agreement with previous reports for this compound. [20]

**4v** *S*-dodecyl 2,2-dimethylpropanethioate

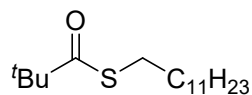

The title compound was isolated as a colorless oil (171 mg, 60% yield),  $^1\text{H NMR}$  (400 MHz,  $\text{CDCl}_3$ )  $\delta$  2.84 – 2.76 (m, 2H), 1.53 (dt,  $J = 15.0, 7.4$  Hz, 2H), 1.36 – 1.18 (m, 27H), 0.86 (t,  $J = 6.8$  Hz, 3H).  $^{13}\text{C NMR}$  (101 MHz,  $\text{CDCl}_3$ )  $\delta$  207.1, 46.5, 32.1, 29.8, 29.7, 29.7, 29.6, 29.5, 29.3, 29.1, 28.7, 27.5, 22.8, 14.2. Characterization is in agreement with previous reports for this compound. [21]

**4w** *S*-dodecyl 2-methylpropanethioate

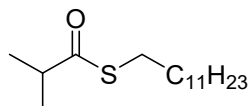

The title compound was isolated as a colorless oil (169 mg, 62% yield),  $^1\text{H NMR}$  (400 MHz,  $\text{CDCl}_3$ )  $\delta$  2.83 (t,  $J = 7.4$  Hz, 2H), 2.76 – 2.66 (m, 1H), 1.58 – 1.50 (m, 2H), 1.36 – 1.21 (m, 18H), 1.17 (d,  $J = 6.9$  Hz, 6H), 0.86 (t,  $J = 6.7$  Hz, 3H).  $^{13}\text{C NMR}$  (101 MHz,  $\text{CDCl}_3$ )  $\delta$  204.5, 43.2, 32.0, 29.8, 29.7, 29.7, 29.6, 29.5, 29.3, 29.0, 28.7, 22.8, 19.5, 14.2. Characterization is in agreement with previous reports for this compound. [21]

**4x** *S*-dodecyl 3-methylbut-2-enethioate

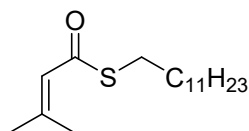

The title compound was isolated as a colorless oil (200 mg, 70% yield),  $^1\text{H NMR}$  (400 MHz,  $\text{CDCl}_3$ )  $\delta$  5.97 (t,  $J = 1.4$  Hz, 1H), 2.87 (t,  $J = 7.4$  Hz, 2H), 2.15 (d,  $J = 1.2$  Hz, 3H), 1.86 (d,  $J = 1.3$  Hz, 3H), 1.60 – 1.53 (m, 2H), 1.40 – 1.16 (m, 18H), 0.87 (t,  $J = 6.8$  Hz, 3H).  $^{13}\text{C NMR}$  (101 MHz,  $\text{CDCl}_3$ )  $\delta$  189.6, 153.3, 123.5, 32.0, 29.9, 29.8, 29.8, 29.7, 29.6, 29.5, 29.3, 29.1, 28.9, 27.3, 22.8, 21.2, 14.2. **HRMS (ESI)**  $m/z$ : calculated for  $\text{C}_{17}\text{H}_{32}\text{OS}[\text{H}]^+$ : 285.2247; found: 285.2247.

**4y** *S*-dodecyl 3-(4-cyanophenyl)propanethioate

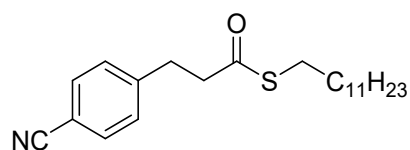

The title compound was isolated as a white solid (231 mg, 64% yield), <sup>1</sup>H NMR (400 MHz, CDCl<sub>3</sub>) δ 7.57 (d, *J* = 8.3 Hz, 2H), 7.29 (d, *J* = 8.2 Hz, 2H), 3.03 (t, *J* = 7.5 Hz, 2H), 2.89 – 2.77 (m, 4H), 1.53 (p, *J* = 7.8, 7.2 Hz, 2H), 1.33 – 1.25 (m, 18H), 0.87 (t, *J* = 6.8 Hz, 3H). <sup>13</sup>C NMR (101 MHz, CDCl<sub>3</sub>) δ 198.2, 145.9, 132.5, 129.4, 119.0, 110.5, 44.6, 32.0, 31.5, 29.8, 29.7, 29.6, 29.6, 29.5, 29.2, 29.1, 28.9, 22.8, 14.3. HRMS (ESI) *m/z*: calculated for C<sub>22</sub>H<sub>33</sub>NOS[H]<sup>+</sup>: 360.2356; found: 360.2356.

**4z** *S*-benzyl benzothioate

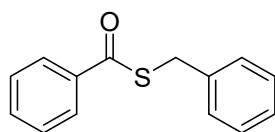

The title compound was isolated as a colorless oil (132 mg, 58% yield; gram-scale reaction: 1.152g, 50% yield), <sup>1</sup>H NMR (400 MHz, CDCl<sub>3</sub>) δ 7.96 (dt, *J* = 8.5, 1.6 Hz, 2H), 7.53 (tt, *J* = 6.9, 1.2 Hz, 1H), 7.39 – 7.32 (m, 3H), 7.30 – 7.25 (m, 1H), 7.32 – 7.27 (m, 2H), 7.26 – 7.19 (m, 1H), 4.30 (s, 2H). <sup>13</sup>C NMR (101 MHz, CDCl<sub>3</sub>) δ 191.3, 137.6, 136.8, 133.5, 129.1, 128.7, 128.7, 127.4, 127.4, 33.4. Characterization is in agreement with previous reports for this compound. [2g]

**4aa** *S*-(*m*-tolyl) benzothioate

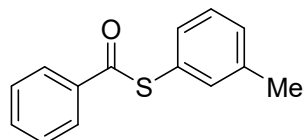

The title compound was isolated as a colorless oil (113 mg, 49% yield), <sup>1</sup>H NMR (400 MHz, CDCl<sub>3</sub>) δ 8.05 (dt, *J* = 8.5, 1.7 Hz, 2H), 7.62 (t, *J* = 7.4 Hz, 1H), 7.50 (t, *J* = 7.7 Hz, 2H), 7.38 – 7.26 (m, 4H), 2.41 (s, 3H). <sup>13</sup>C NMR (101 MHz, CDCl<sub>3</sub>) δ 190.5, 139.2, 136.8, 135.8, 133.7, 132.2, 130.5, 129.2, 128.9, 127.6, 127.1, 21.4. Characterization is in agreement with previous reports for this compound. [2h]

**4ab** *S*-(4-methoxyphenyl) benzothioate

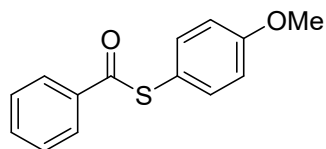

The title compound was isolated as a colorless oil (89 mg, 36% yield), <sup>1</sup>H NMR (400 MHz, CDCl<sub>3</sub>) δ 8.03 (d, *J* = 7.2 Hz, 2H), 7.61 (t, *J* = 7.4 Hz, 1H), 7.48 (t, *J* = 7.7 Hz, 2H), 7.42 (d, *J* = 8.8 Hz, 2H), 6.99 (d, *J* = 8.8 Hz, 2H), 3.85 (s, 3H). <sup>13</sup>C NMR (101 MHz, CDCl<sub>3</sub>) δ 191.2, 160.9, 136.8, 133.7, 128.9, 127.6, 118.0, 115.1, 55.5. Characterization is in agreement with previous reports for this compound. [2i]



**4ac** *S*-(4-bromophenyl) benzothioate

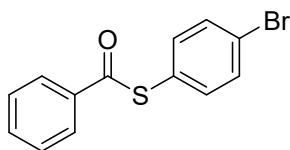

The title compound was isolated as a white solid (86 mg, 30% yield),  $^1\text{H NMR}$  (400 MHz,  $\text{CDCl}_3$ )  $\delta$  8.03 (d,  $J = 7.3$  Hz, 2H), 7.65 – 7.57 (m, 3H), 7.50 (t,  $J = 7.7$  Hz, 2H), 7.38 (d,  $J = 8.4$  Hz, 2H).  $^{13}\text{C NMR}$  (101 MHz,  $\text{CDCl}_3$ )  $\delta$  189.5, 136.6, 136.4, 133.9, 132.5, 128.9, 127.6, 126.6, 124.3, Characterization is in agreement with previous reports for this compound. [2j]

**4ad** *S*-(4-fluorophenyl) 4-methoxybenzothioate

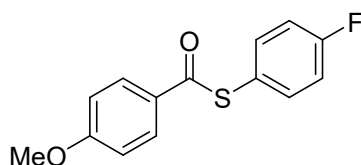

The title compound was isolated as a white solid (79 mg, 30% yield),  $^1\text{H NMR}$  (400 MHz,  $\text{CDCl}_3$ )  $\delta$  8.00 (d,  $J = 8.9$  Hz, 2H), 7.57 – 7.41 (m, 2H), 7.14 (t,  $J = 8.6$  Hz, 2H), 6.96 (d,  $J = 8.9$  Hz, 2H), 3.87 (s, 3H).  $^{13}\text{C NMR}$  (101 MHz,  $\text{CDCl}_3$ )  $\delta$  188.6, 164.2, 163.6 (d,  $J = 249.8$  Hz), 137.3 (d,  $J = 8.6$  Hz), 129.8, 129.2, 123.0 (d,  $J = 3.8$  Hz), 116.5 (d,  $J = 22.1$  Hz), 114.0, 55.6. Characterization is in agreement with previous reports for this compound. [2k]

**4ae** *S*-(4-methoxyphenyl) 4-methoxybenzothioate

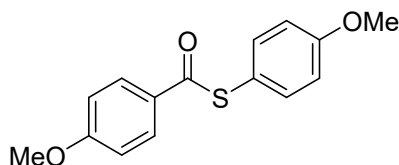

The title compound was isolated as a white solid (89 mg, 32% yield),  $^1\text{H NMR}$  (400 MHz,  $\text{CDCl}_3$ )  $\delta$  8.34 – 7.75 (m, 2H), 7.42 (d,  $J = 8.8$  Hz, 2H), 7.11 – 6.85 (m, 4H), 3.86 (s, 3H), 3.84 (s, 3H).  $^{13}\text{C NMR}$  (101 MHz,  $\text{CDCl}_3$ )  $\delta$  189.5, 164.0, 160.7, 136.8, 129.7, 129.5, 118.2, 114.9, 113.9, 55.6, 55.4. Characterization is in agreement with previous reports for this compound. [2l]

**4af** *S*-(2,6-dimethylphenyl) 4-methoxybenzothioate

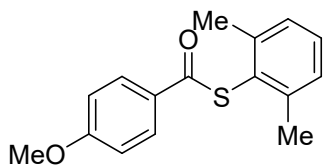

The title compound was isolated as a colorless oil (76 mg, 28% yield),  $^1\text{H NMR}$  (400 MHz,  $\text{CDCl}_3$ )  $\delta$  8.06 (d,  $J = 8.9$  Hz, 2H), 7.29 – 7.24 (m, 1H), 7.19 (d,  $J = 8.0$  Hz, 2H), 6.96 (d,  $J = 8.9$  Hz, 2H), 3.87 (s, 3H), 2.40 (s, 6H).  $^{13}\text{C NMR}$  (101 MHz,  $\text{CDCl}_3$ )  $\delta$  187.7, 164.0, 143.4, 129.9, 129.9, 128.4, 128.3, 127.0, 113.9, 55.6, 21.9. Characterization is in agreement with previous reports for this compound. [2m]

**4ag** *S*-benzyl 4-methoxybenzothioate

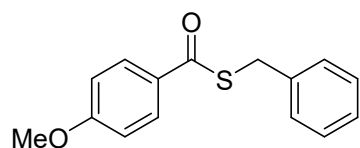

The title compound was isolated as a colorless oil (Gram-scale reaction: 1.453 g, 56% yield),  $^1\text{H NMR}$  (400 MHz,  $\text{CDCl}_3$ )  $\delta$  7.95 (d,  $J = 9.0$  Hz, 2H), 7.38 (d,  $J = 6.9$  Hz, 2H), 7.31 (t,  $J = 7.4$  Hz, 2H), 7.28 – 7.23 (m, 1H), 6.91 (d,  $J = 8.9$  Hz, 2H), 4.30 (s, 2H), 3.85 (s, 3H).  $^{13}\text{C NMR}$  (101 MHz,  $\text{CDCl}_3$ )  $\delta$  189.9, 163.9, 137.9, 129.8, 129.6, 129.1, 128.7, 127.4, 113.9, 55.6, 33.3. Characterization is in agreement with previous reports for this compound. [2g]

**4ah** *S*-dodecyl 2-(4-isobutylphenyl)propanethioate

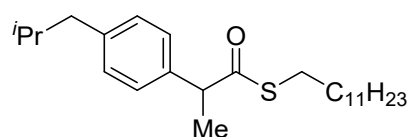

The title compound was isolated as a colorless oil (229 mg, 59% yield),  $^1\text{H NMR}$  (400 MHz,  $\text{CDCl}_3$ )  $\delta$  7.22 (d,  $J = 8.1$  Hz, 2H), 7.11 (d,  $J = 8.1$  Hz, 2H), 3.86 (q,  $J = 7.1$  Hz, 1H), 2.93 – 2.70 (m, 2H), 2.46 (d,  $J = 7.2$  Hz, 2H), 1.86 (dp,  $J = 13.6, 6.7$  Hz, 1H), 1.53 (d,  $J = 7.1$  Hz, 5H), 1.35 – 1.19 (m, 18H), 0.87 – 0.92 (m, 9H).  $^{13}\text{C NMR}$  (101 MHz,  $\text{CDCl}_3$ )  $\delta$  201.7, 140.9, 137.4, 129.5, 127.7, 54.0, 45.2, 32.1, 30.3, 29.8, 29.7, 29.6, 29.6, 29.5, 29.2, 29.2, 29.0, 22.8, 22.5, 18.6, 14.3. **HRMS (ESI)**  $m/z$ : calculated for  $\text{C}_{25}\text{H}_{42}\text{OS}[\text{H}]^+$ : 391.3030; found: 391.3014.

**4ai** *S*-dodecyl 2-(6-methoxynaphthalen-2-yl)propanethioate

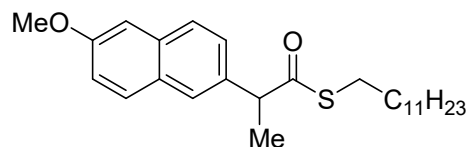

The title compound was isolated as a colorless oil (208 mg, 50% yield),  $^1\text{H NMR}$  (400 MHz,  $\text{CDCl}_3$ )  $\delta$  7.78 – 7.64 (m, 3H), 7.41 (dd,  $J = 8.5, 1.8$  Hz, 1H), 7.19 – 7.07 (m, 2H), 4.02 (q,  $J = 7.1$  Hz, 1H), 3.92 (s, 3H), 2.83 (tt,  $J = 13.3, 6.6$  Hz, 2H), 1.62 (d,  $J = 7.1$  Hz, 3H), 1.52 (p,  $J = 7.5, 7.0$  Hz, 2H), 1.30 – 1.24 (m, 18H), 0.89 (t,  $J = 6.9$  Hz, 3H).  $^{13}\text{C NMR}$  (101 MHz,  $\text{CDCl}_3$ )  $\delta$  201.6, 157.8, 135.3, 134.0, 129.5, 129.1, 127.3, 126.7, 126.5, 119.1, 105.7, 55.4, 54.3, 32.0, 29.8, 29.7, 29.6, 29.5, 29.5, 29.3, 29.2, 29.0, 22.8, 18.6, 14.3. **HRMS (ESI)**  $m/z$ : calculated for  $\text{C}_{26}\text{H}_{38}\text{O}_2\text{S}[\text{H}]^+$ : 415.2666; found: 415.2657.

**4aj** *S*-dodecyl 3-(1-(4-chlorobenzoyl)-5-methoxy-2-methyl-1*H*-indol-3-yl)propanethioate

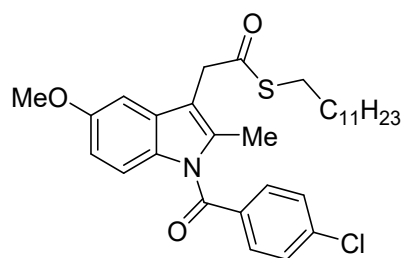

The title compound was isolated as a yellow oil (225 mg, 40% yield),  $^1\text{H NMR}$  (101 MHz,  $\text{CDCl}_3$ )  $\delta$  7.66 (d,  $J = 8.5$  Hz, 2H), 7.47 (d,  $J = 8.4$  Hz, 2H), 6.95 (d,  $J = 2.5$  Hz, 1H), 6.89 (d,  $J = 9.0$  Hz, 1H), 6.68 (dd,  $J = 9.0, 2.5$  Hz, 1H), 3.85 (s, 2H), 3.84 (s, 3H), 2.85 (t,  $J = 7.4$  Hz, 2H), 2.39 (s, 3H), 1.54 (p,  $J = 7.5, 7.0$  Hz, 2H), 1.32 – 1.22 (s, 18H), 0.88 (t,  $J = 6.8$  Hz, 3H).  $^{13}\text{C NMR}$  (101 MHz,  $\text{CDCl}_3$ )  $\delta$  197.4, 168.4, 156.2, 139.4, 136.6, 133.9, 131.3, 130.9, 130.7, 129.2, 115.1, 112.5, 111.9, 101.3, 55.8, 39.5, 32.0, 29.7, 29.7, 29.7, 29.6, 29.5, 29.5, 29.4, 29.2, 29.0, 22.8, 14.2, 13.6. HRMS (ESI)  $m/z$ : calculated for  $\text{C}_{31}\text{H}_{40}\text{ClNO}_3\text{S}[\text{Na}]^+$ : 654.2310; found: 654.2304.

### 4.3 Characterization data of amide.

#### 5 *N*-benzylbenzamide

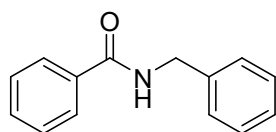

The title compound was isolated as a white solid (49 mg, 77% yield),  $^1\text{H NMR}$  (101 MHz,  $\text{CDCl}_3$ )  $\delta$  7.78 (d,  $J = 7.2$  Hz, 2H), 7.46 (t,  $J = 7.4$  Hz, 1H), 7.37 (t,  $J = 7.5$  Hz, 2H), 7.33 – 7.22 (m, 5H), 6.79 (s, 1H), 4.58 (d,  $J = 5.7$  Hz, 2H).  $^{13}\text{C NMR}$  (101 MHz,  $\text{CDCl}_3$ )  $\delta$  167.6, 138.3, 134.4, 131.6, 128.8, 128.6, 127.9, 127.6, 127.1, 44.1. Characterization is in agreement with previous reports for this compound. <sup>[2n]</sup>

## 5. References

- [1] a): P. V. Ramachandran, A. S. Kulkarni, Y. Zhao and J. G. Mei, *Chem. Commun.*, **2016**, 52, 11885. b): E. Jeong, J. Heo, S. Park, and S. Chang, *Chem.- Eur. J.*, **2019**, 25, 6320. c): M.-C. Wang, J.-Y. F, J.-F. Zhou, W.-X. Zhang, and B.-J. Li. *Chemistryselect*, **2024**, 9, e202400325.
- [2] a): M. Xuan, C. Lu, M. Liu, and B.-L. Lin, *J. Org. Chem.*, **2019**, 84, 7694. b): Y.-T. Huang, S.-Y. Lu, C.-L. Yi, and C.-F. Lee, *J. Org. Chem.*, **2014**, 79, 4561. c): Y.-J. Lin, Y.-P. Wu, M. Thul, M.-W. Hung, S.-H. Chou, W.-T. Chen, W. Lin, M. Lin, D. M. Reddy, H.-R. Wu, W.-Y. Ho, and S.-Y. Luo, *Molecules*, **2020**, 25, 352. d): Y. Hu, J. Liu, Z. Lü, X. Luo, H. Zhang, Y. Lan, A. Lei, *J. Am. Chem. Soc.*, **2010**, 132, 3153. e): D. Kato, T. Murase, J. Talode, H. Nagae, H. Tsurugi, M. Seki, K. Mashima, *Chem.- Eur. J.*, **2022**, 28, e202200474. f): A. Temperini, D. Annesi, L. Testaferri, M. Tiecco, *Tetrahedron Lett.*, **2010**, 51, 5368. g): P. Singh, and R. K. Peddinti, *Tetrahedron Lett.*, **2017**, 58, 1875. h): X. Qi, Z.-P. Bao, X.-T. Yao, and X.-F. Wu, *Org. Lett.*, **2020**, 22, 6671. i): Y. Shi, X. Liu, H. Cao, F. Bie, Y. Han, P. Yan, R. Szostak, M. Szostak, and C. Liu, *Org. Biomol. Chem.*, **2021**, 19, 2991. j): M. Moghadam, S. Tangestaninejad, V. Mirkhani, I. Mohammadpoor-Baltork, M. Babaghanbari, M. Zarea, L. Shariati, and S. A. Taghavi, *J. Iran. Chem. Soc.*, **2009**, 6, 523. k): X. Qi, Z.-P. Bao, and X.-F. Wu, *Org. Chem. Front.*, **2020**, 7, 885. l): S. Xie, L. Su, M. Mo, W. Zhou, Y. Zhou, and J. Dong, *J. Org. Chem.*, **2021**, 86, 739. m): M. N. Burhardt, R. H. Taaning, and T. Skrydstrup, *Org. Lett.*, **2013**, 15, 948. n): P. V. Ramachandran, and H. J. Hamann, *Org. Lett.*, **2021**, 23, 2938. o): M. Asadi, S. Bonke, A. Polyzos, and D. W. Lupton, *ACS Catal.*, **2014**, 4, 2070. p): T.-J. Chai, X.-S. Chiou, N.-X. Lin, Y.-T. Kuo, and C.-K. Lin, *Org. Biomol. Chem.*, **2023**, 21, 7541. q): Z. Zhu, Y. Gong, W. Tong, W. Xue, and H. Gong, *Org. Lett.*, **2021**, 23, 2158. r): S. Naik, V. Kavala, R. Gopinath, and B. K. Patel, *ARKIVOC*, **2006**, 2006, 21.

## 6. NMR spectra

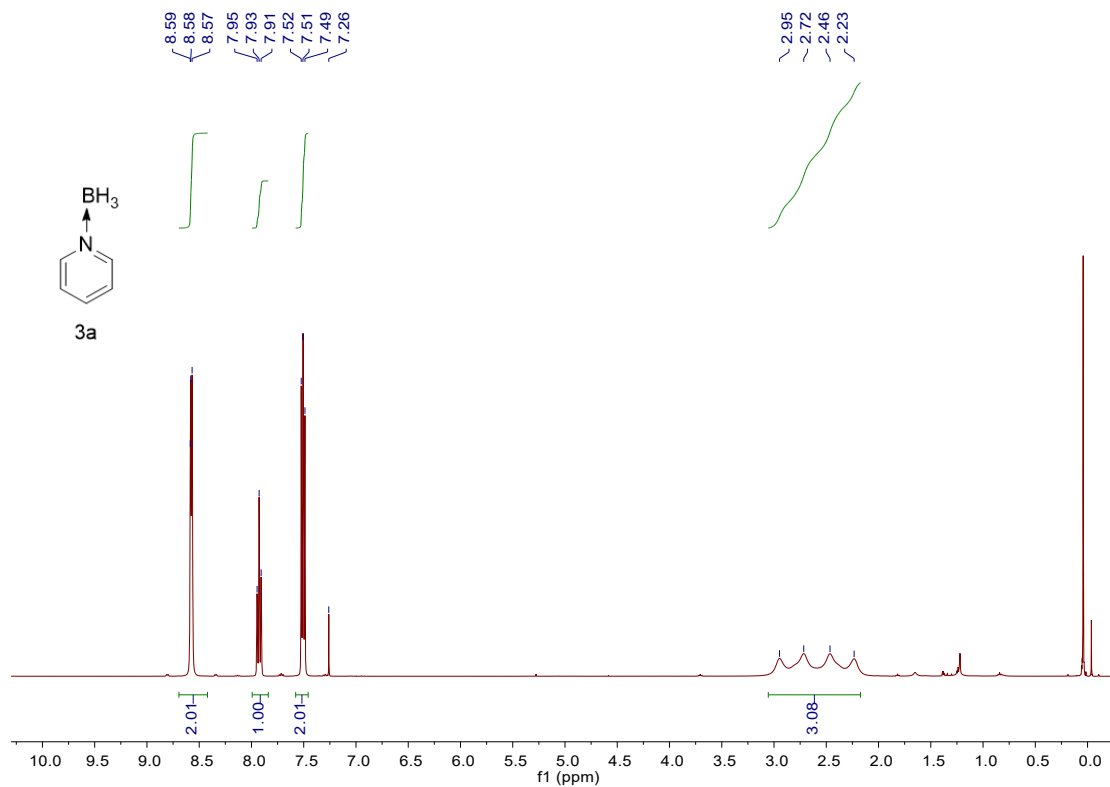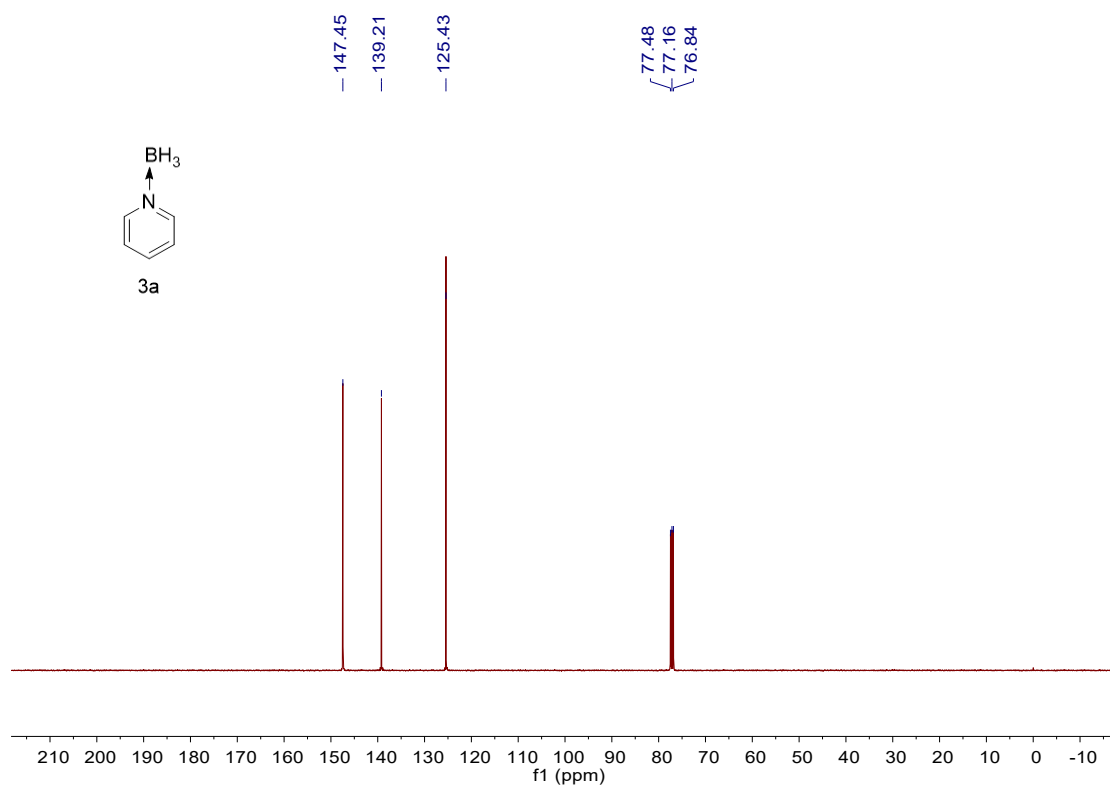

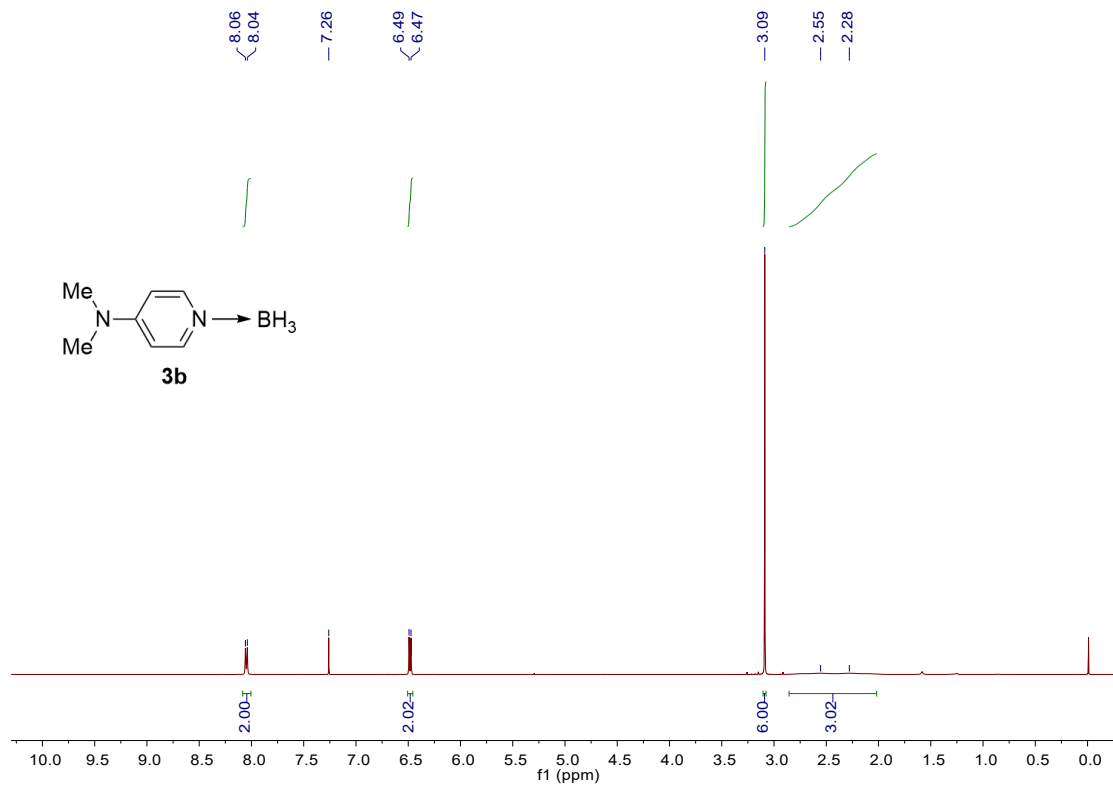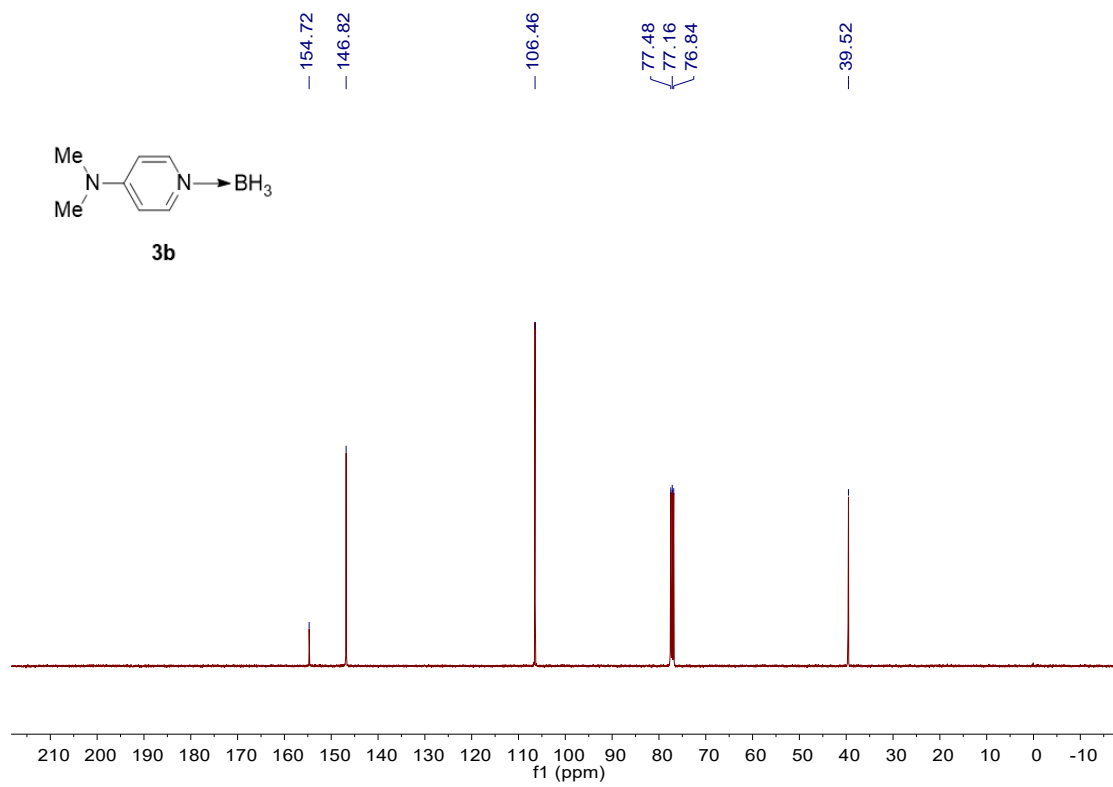

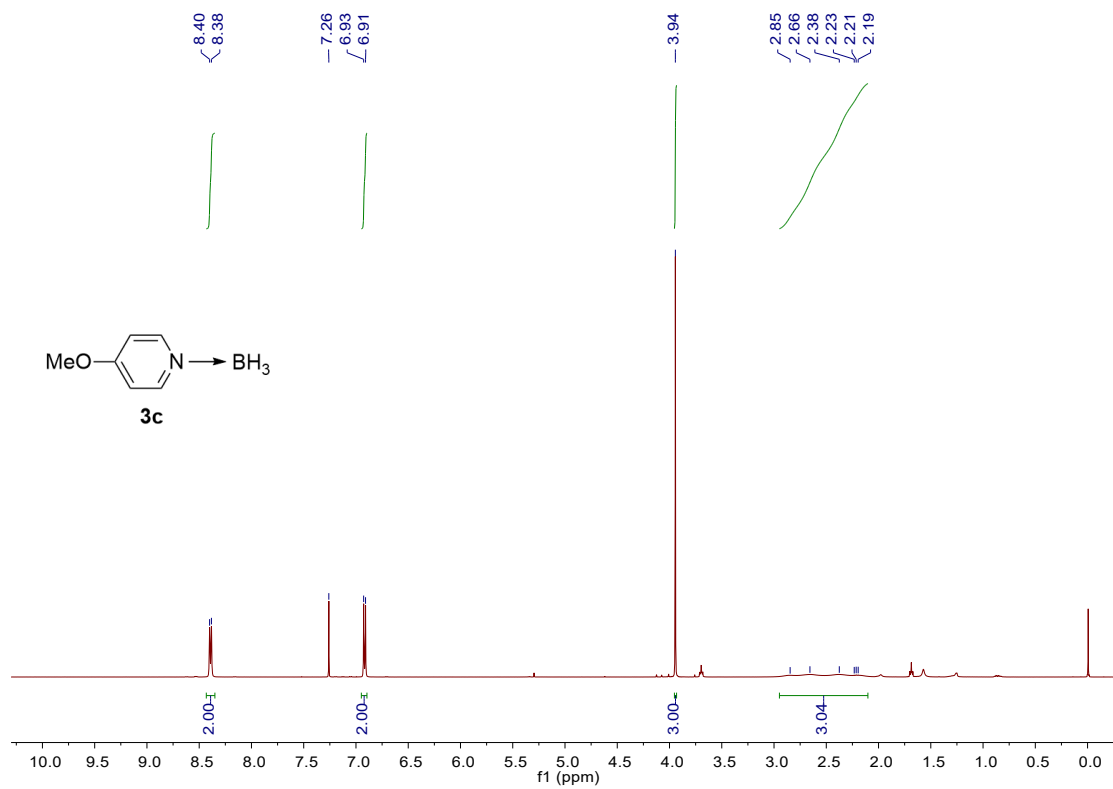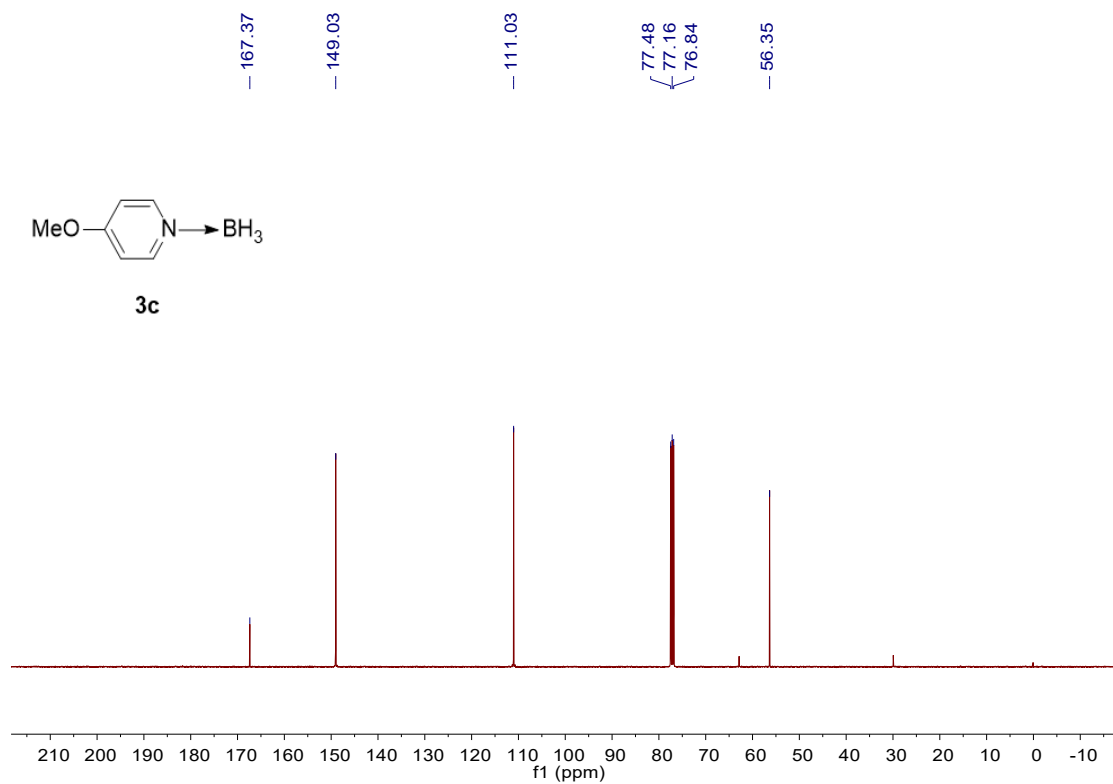

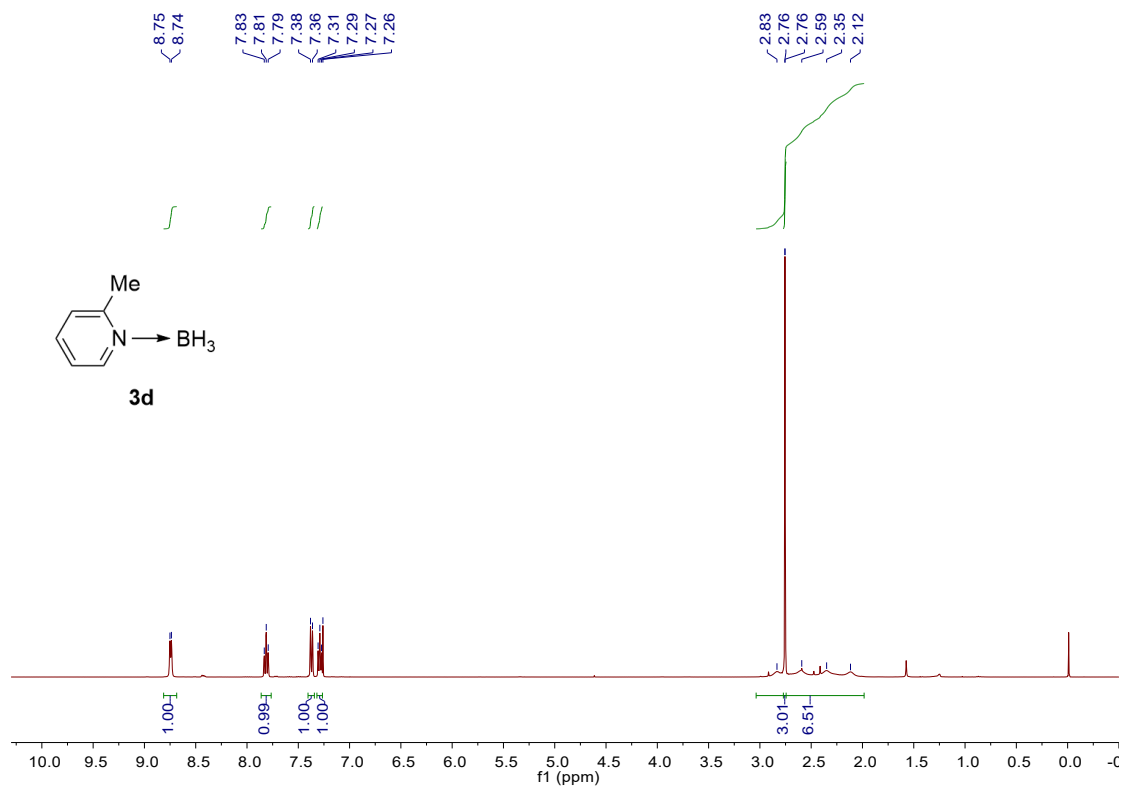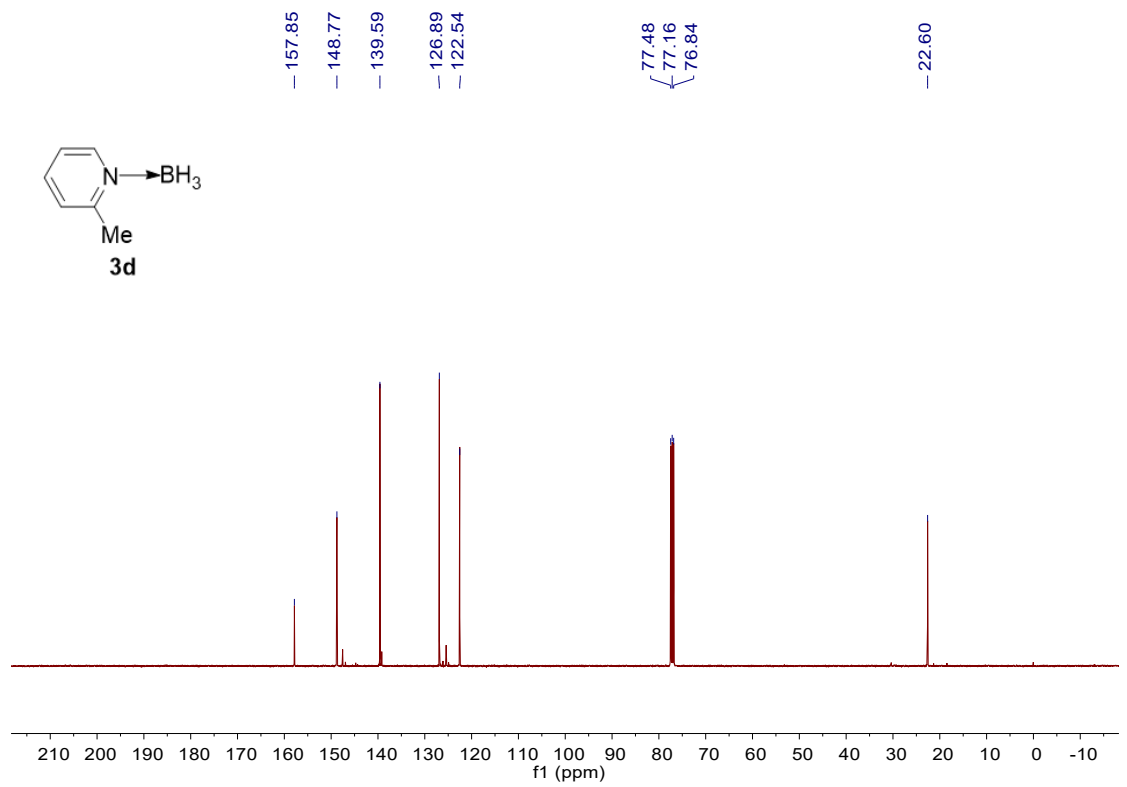



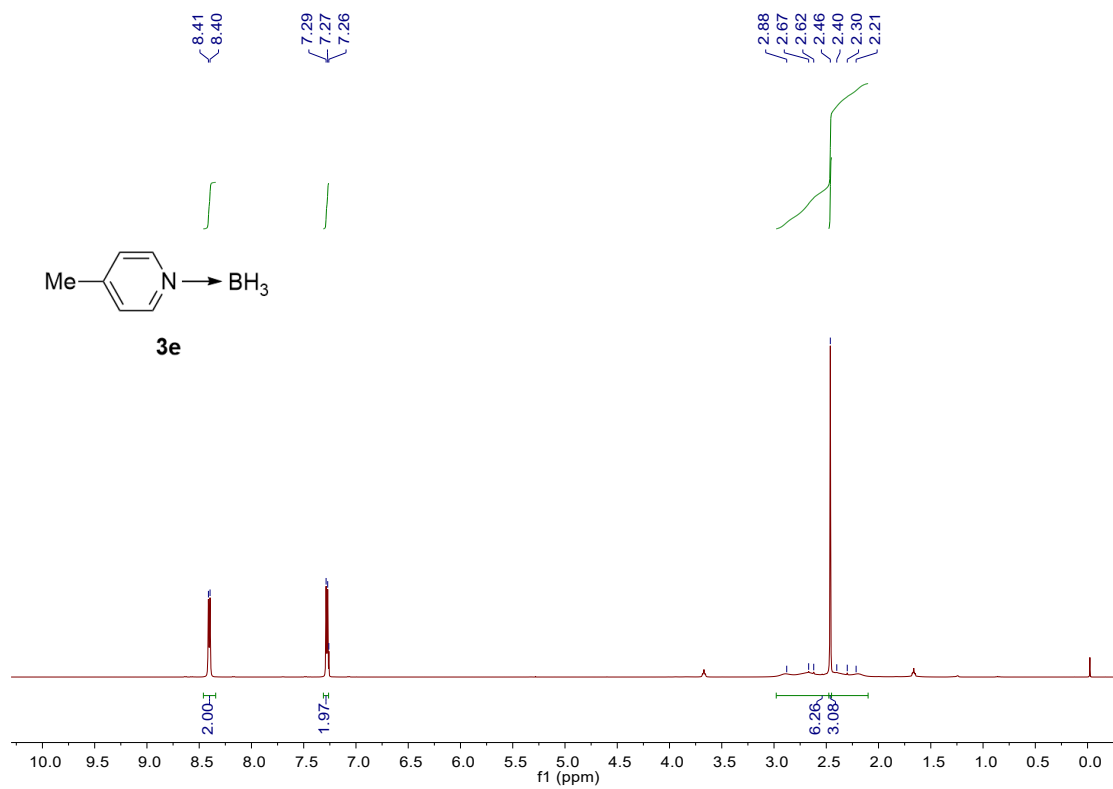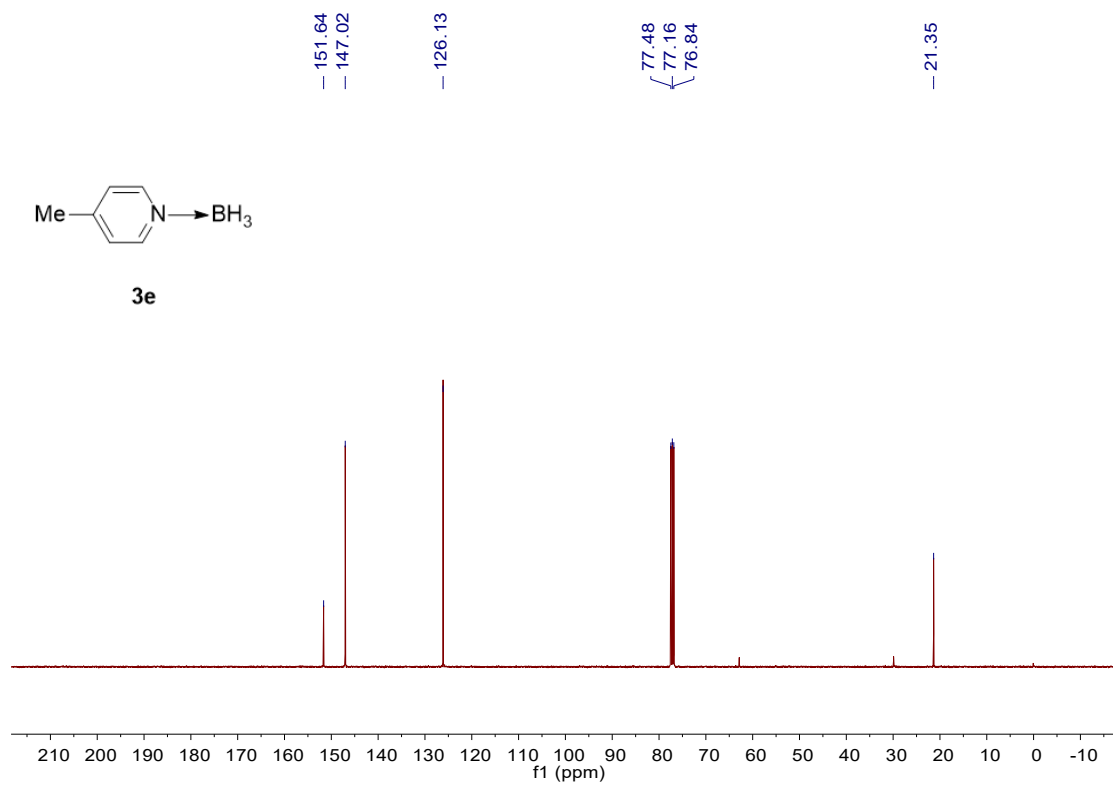

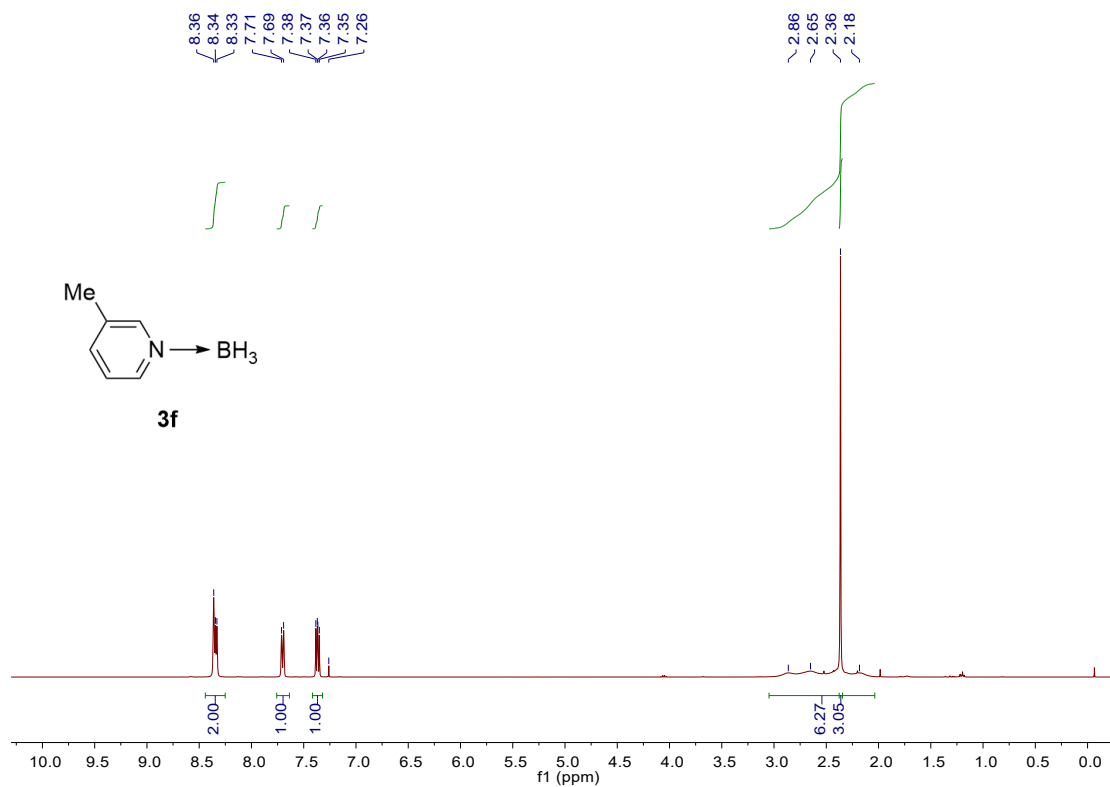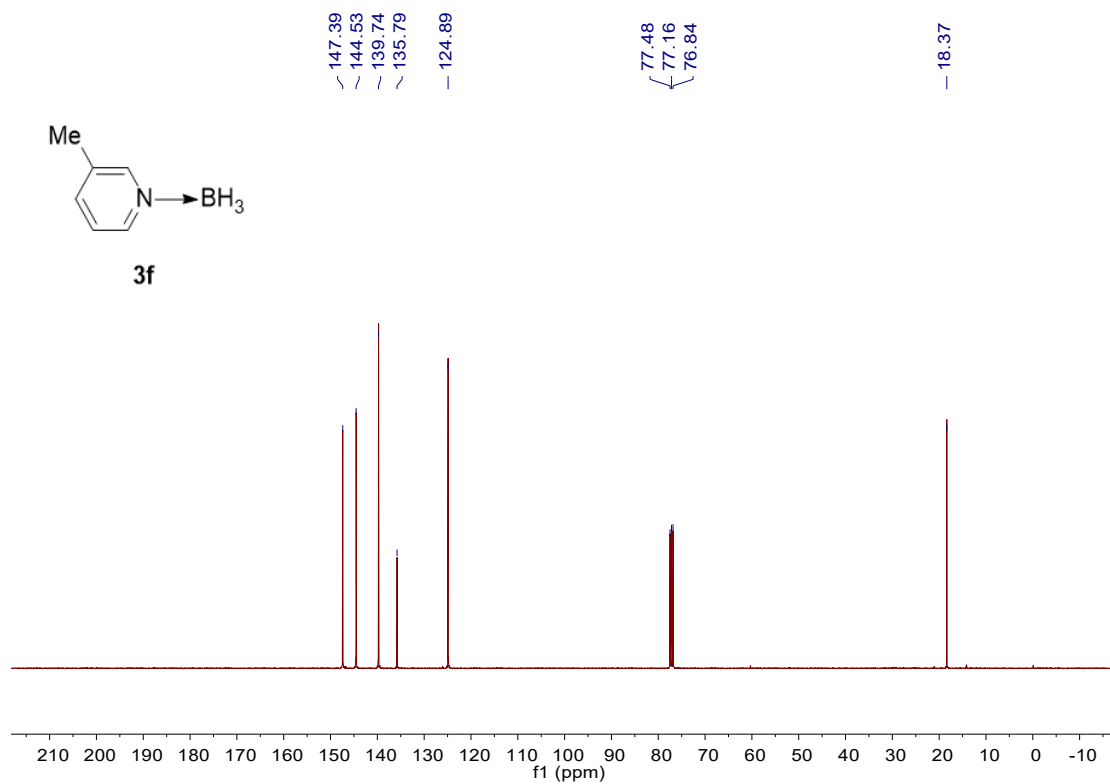

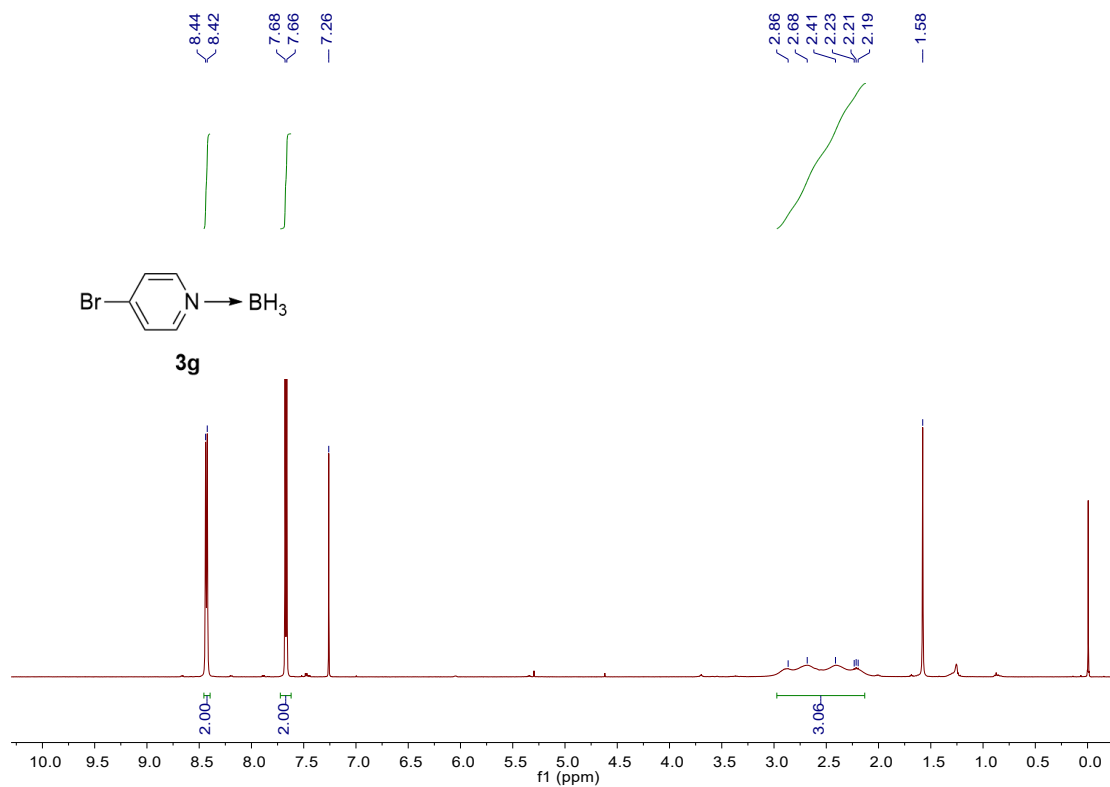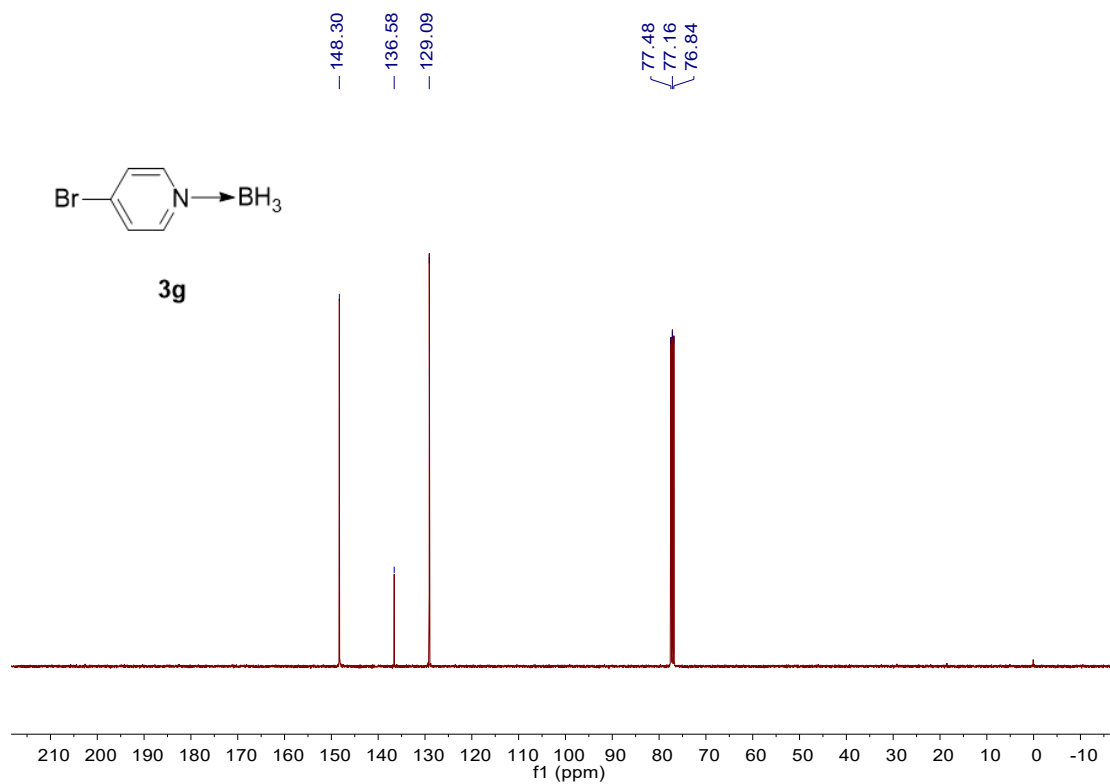

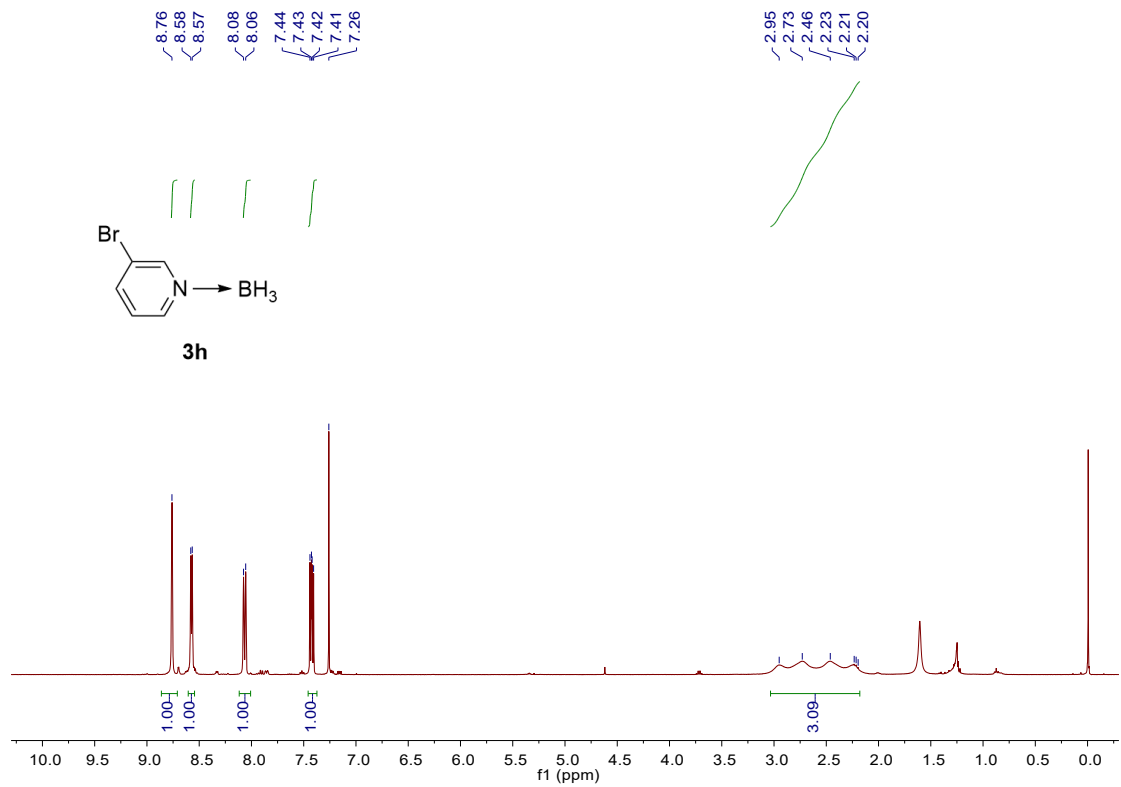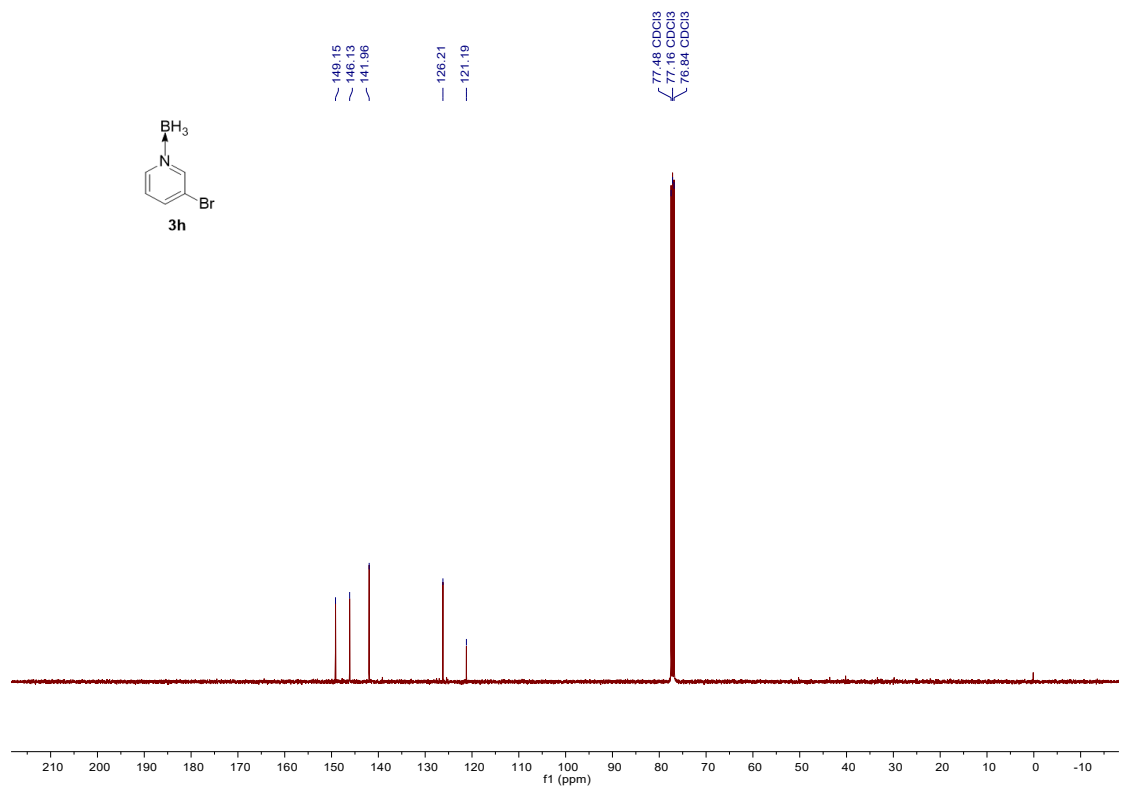

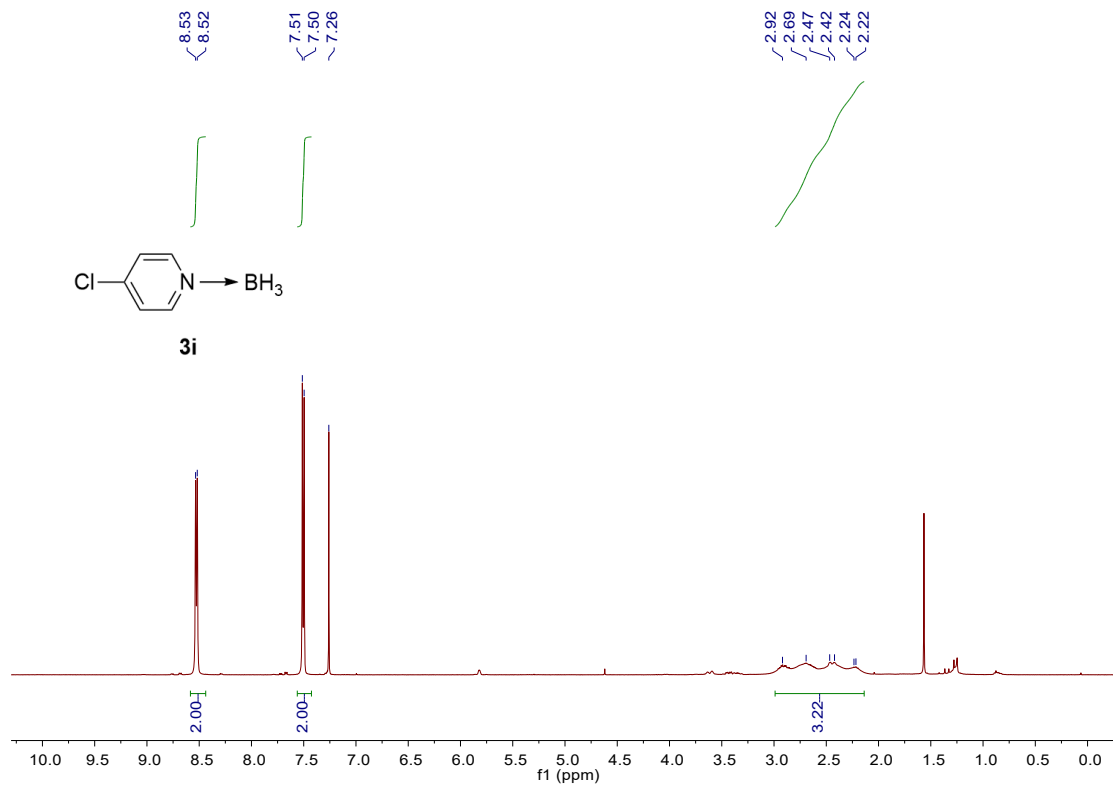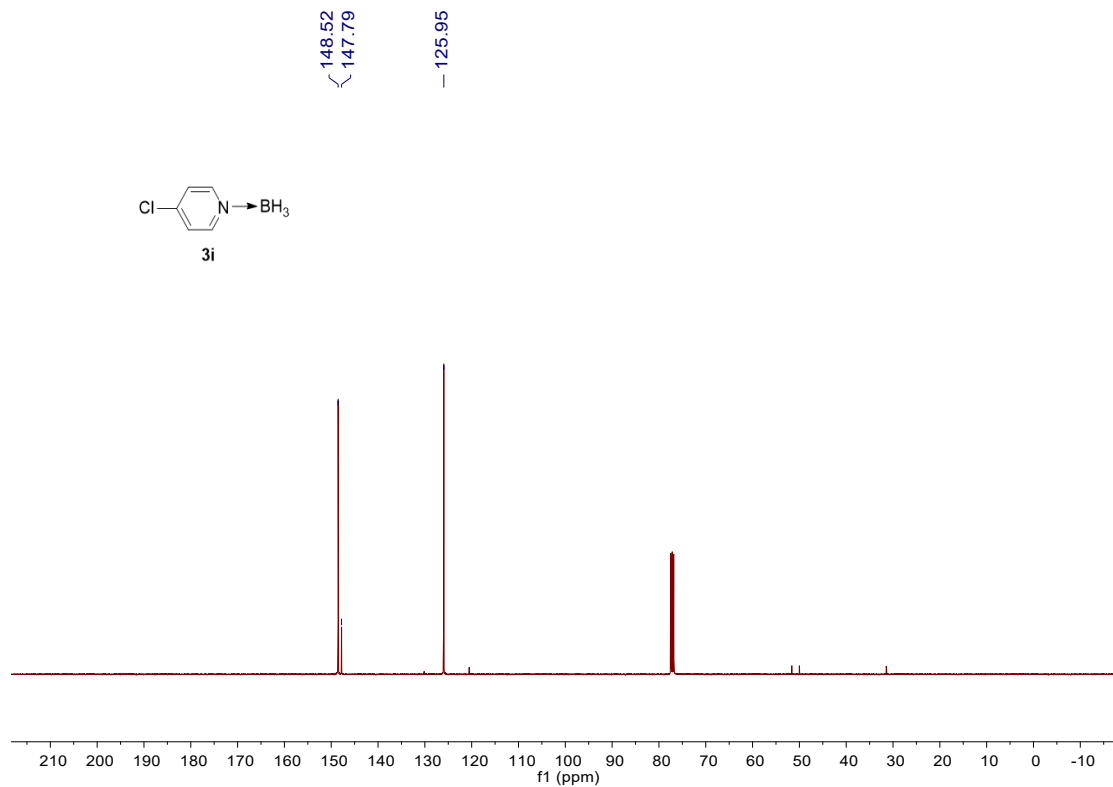

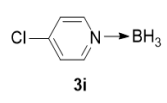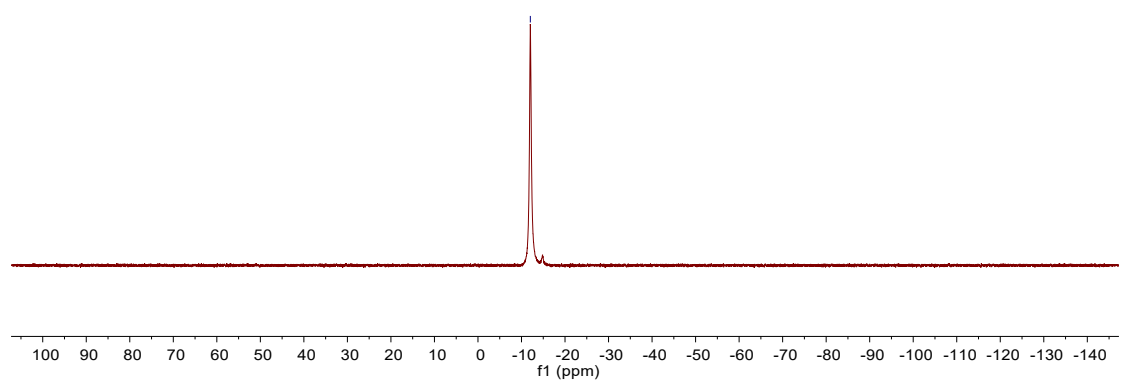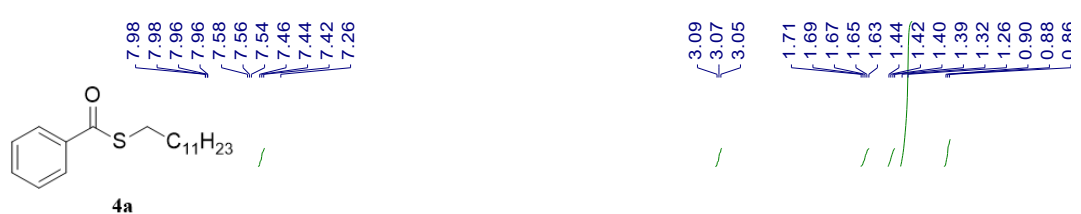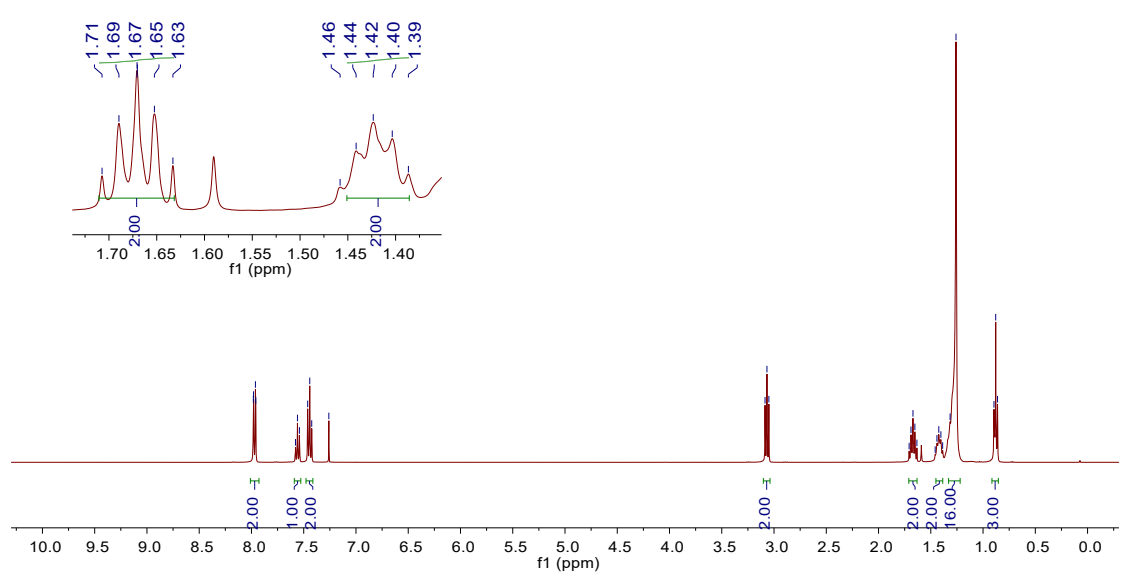

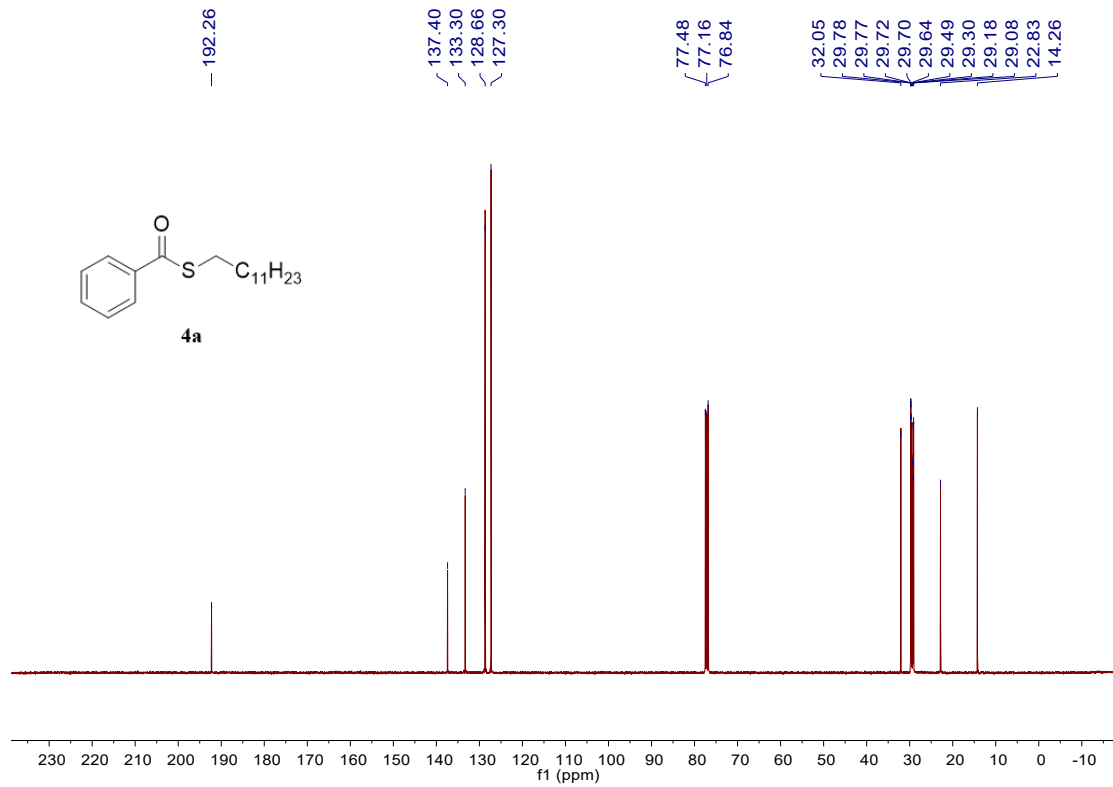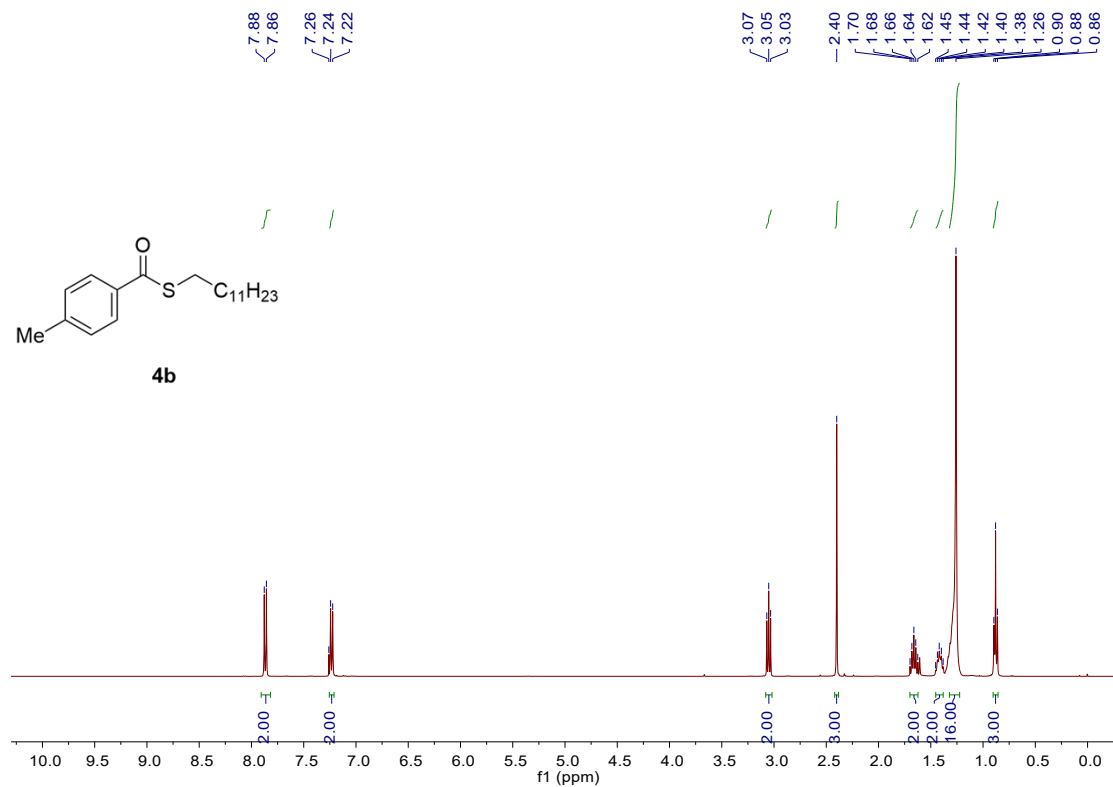

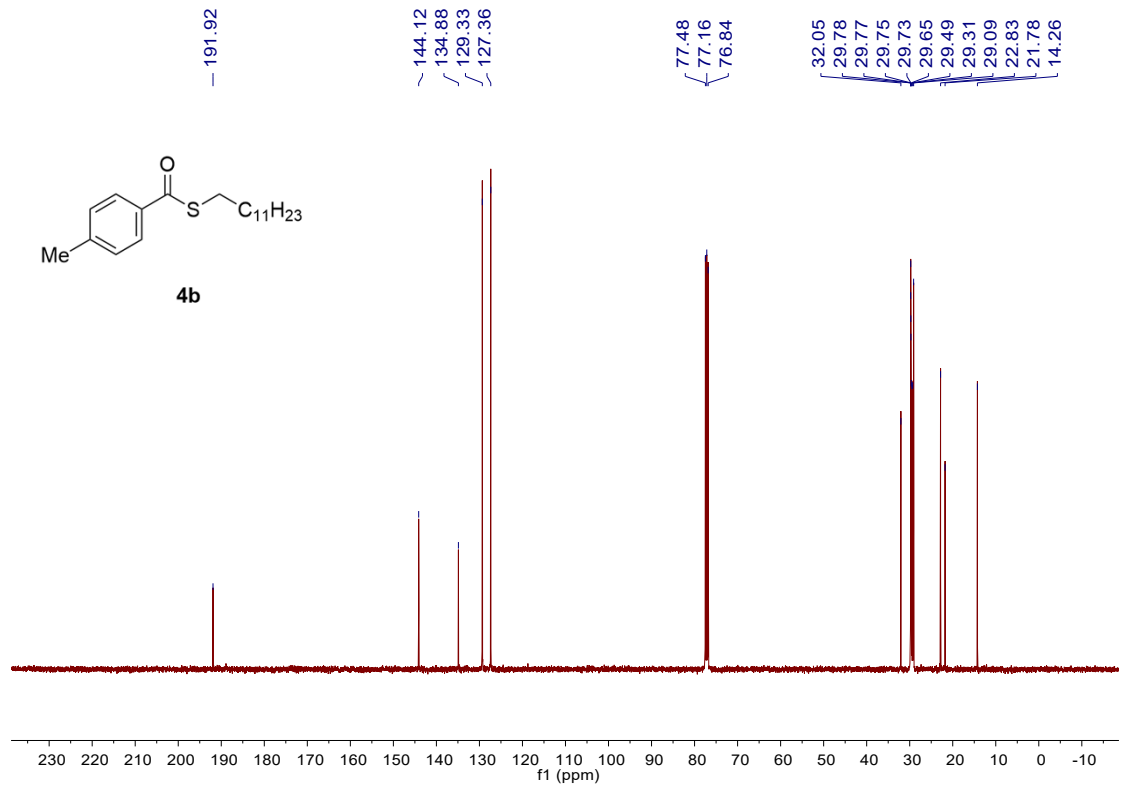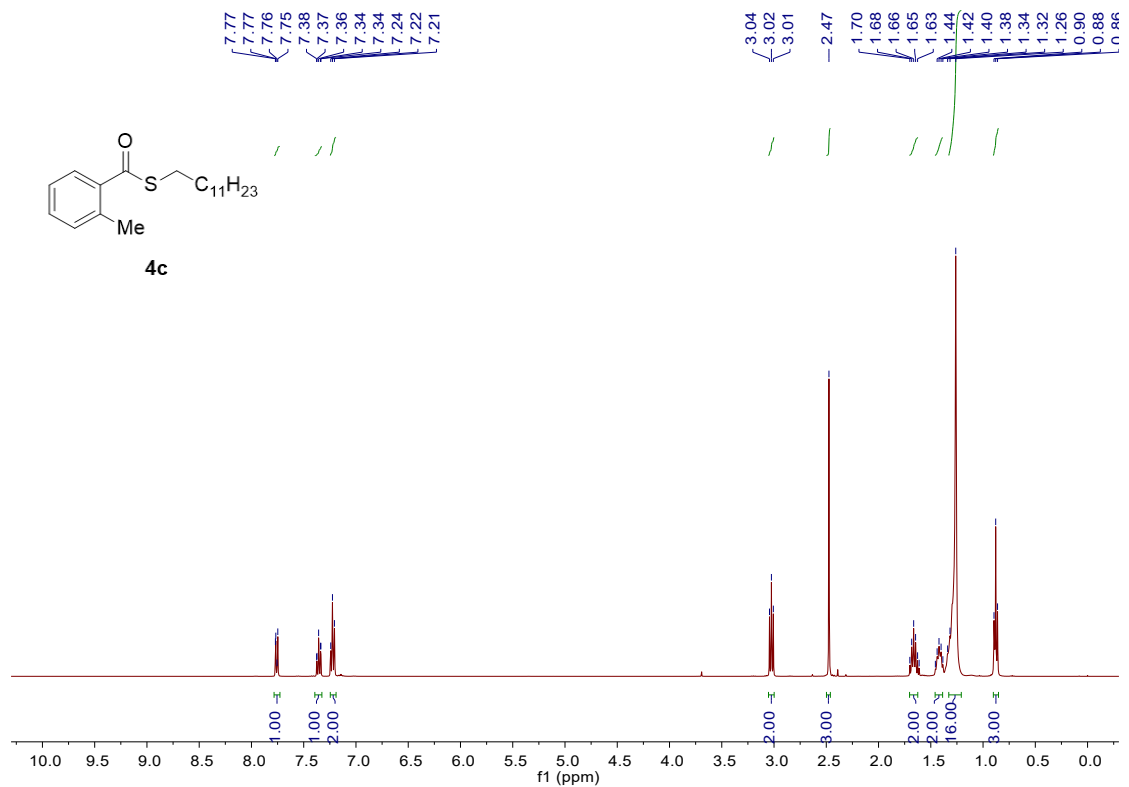



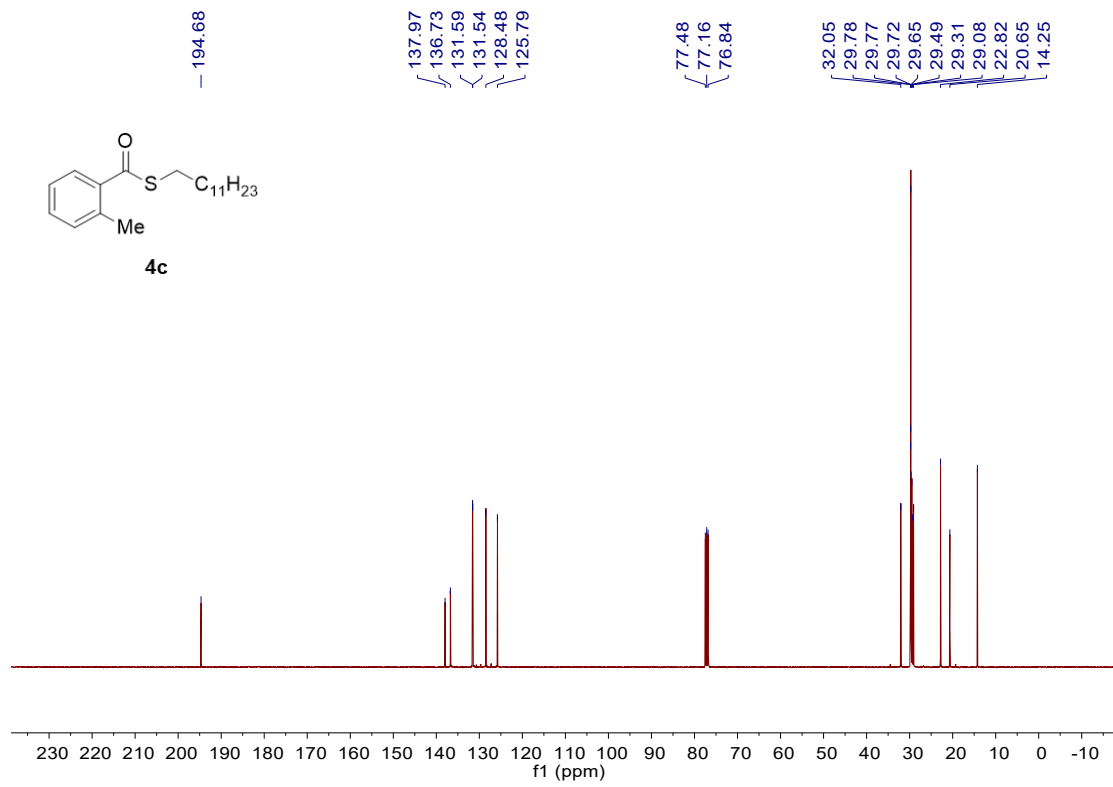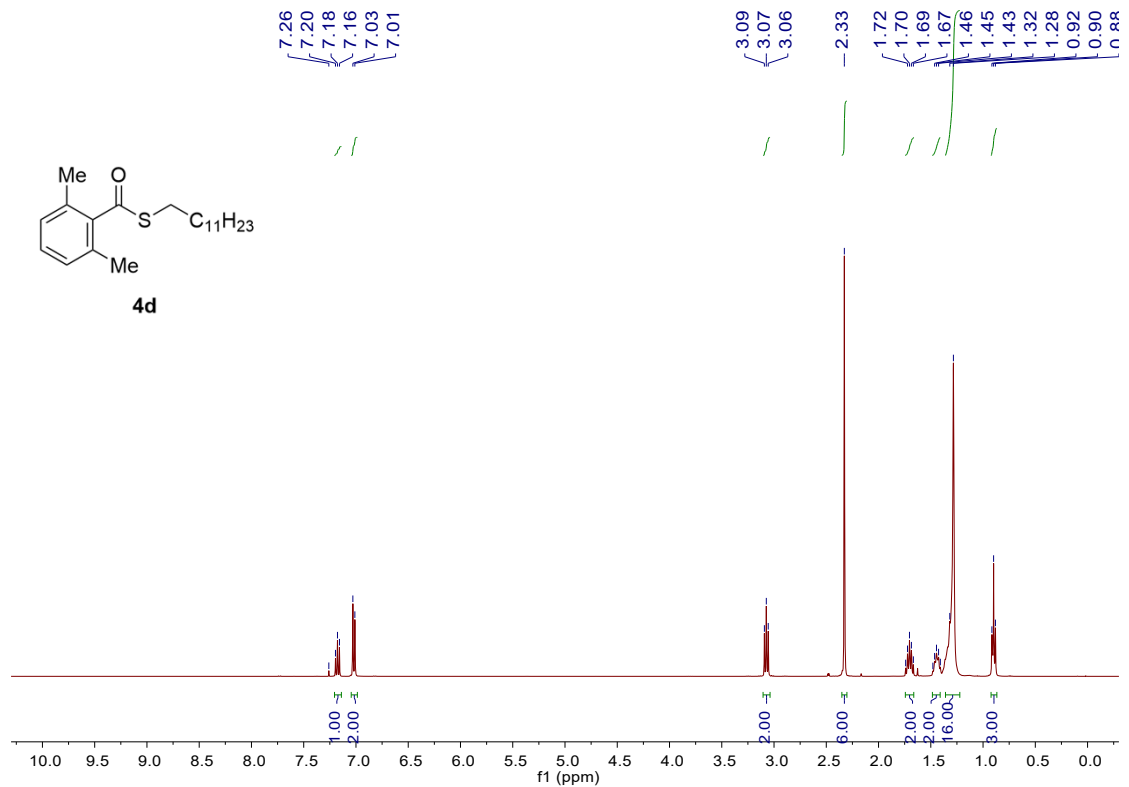

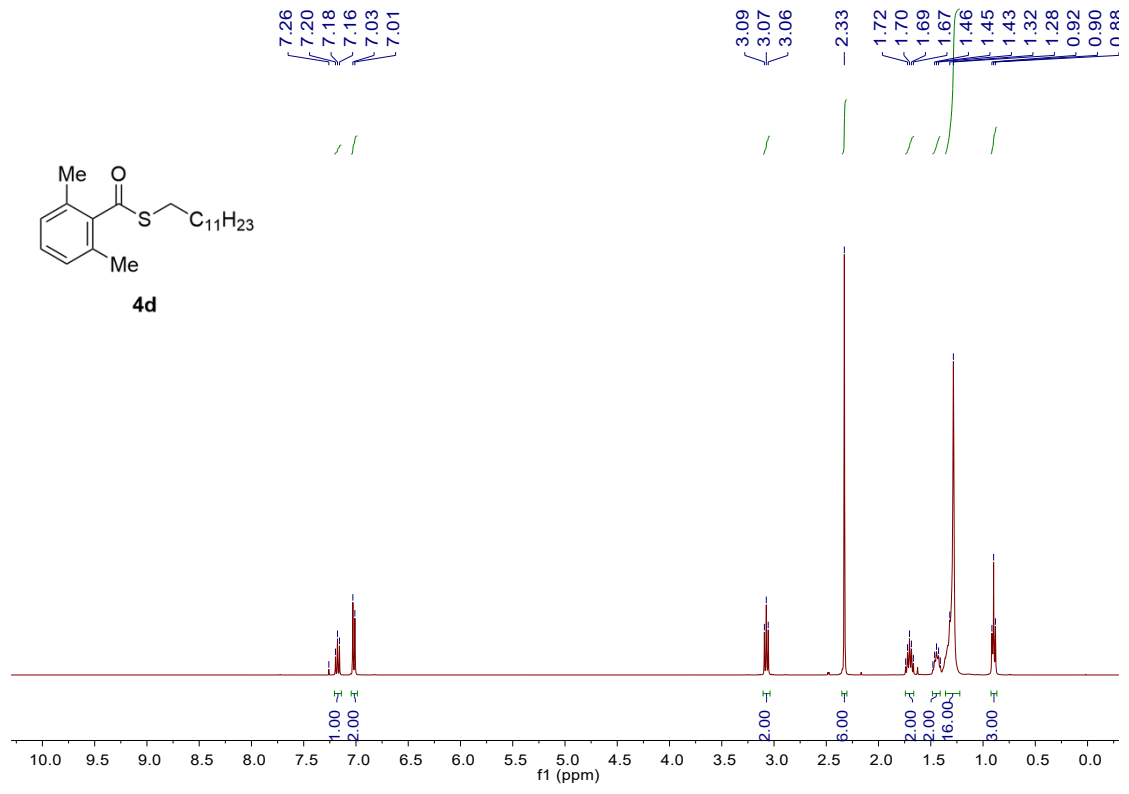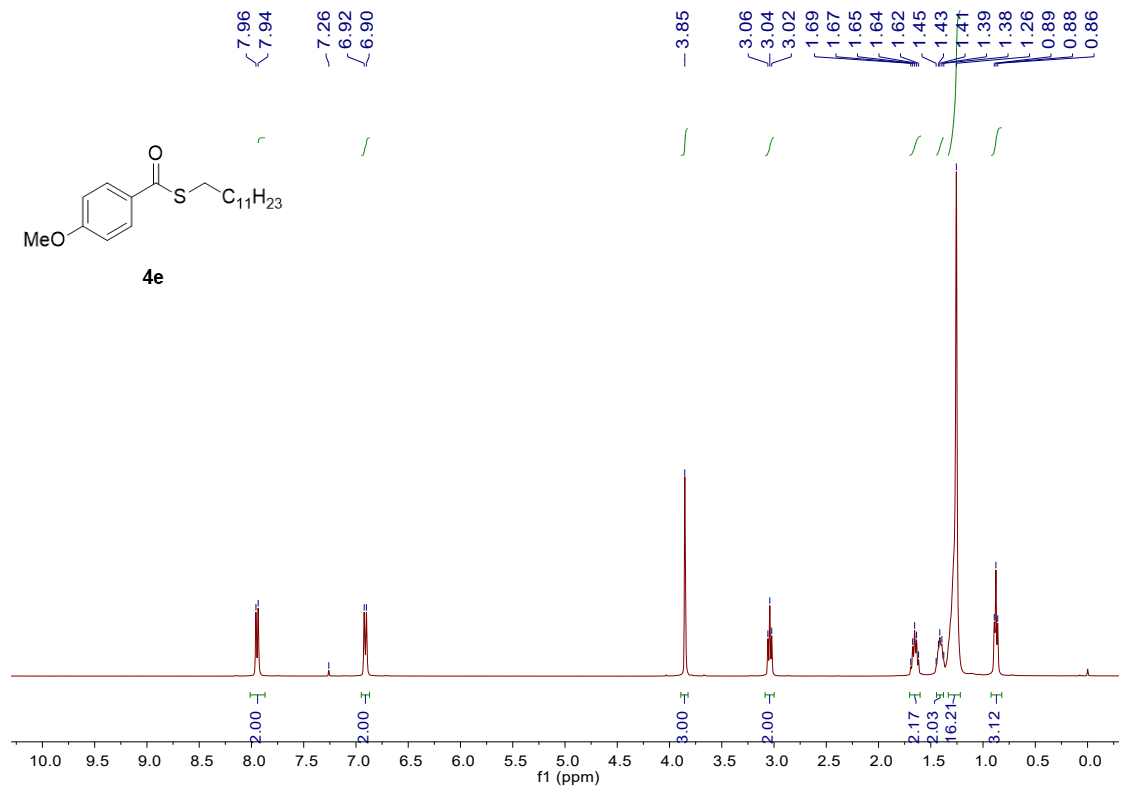

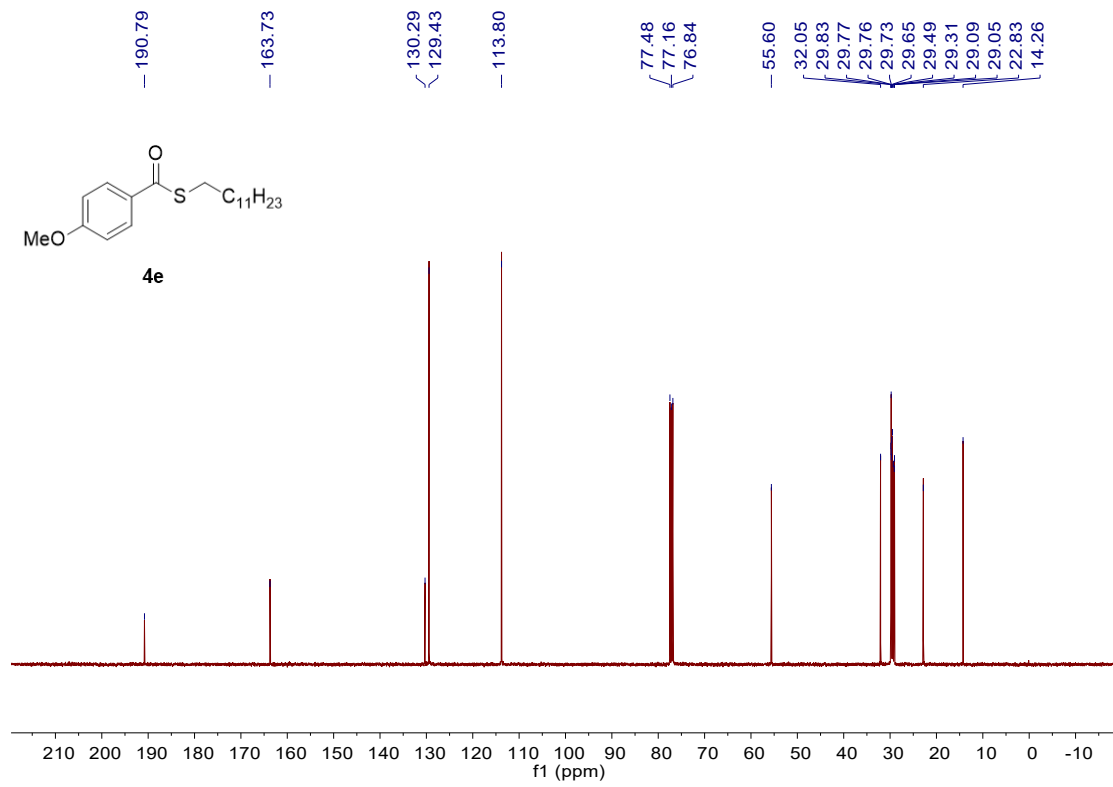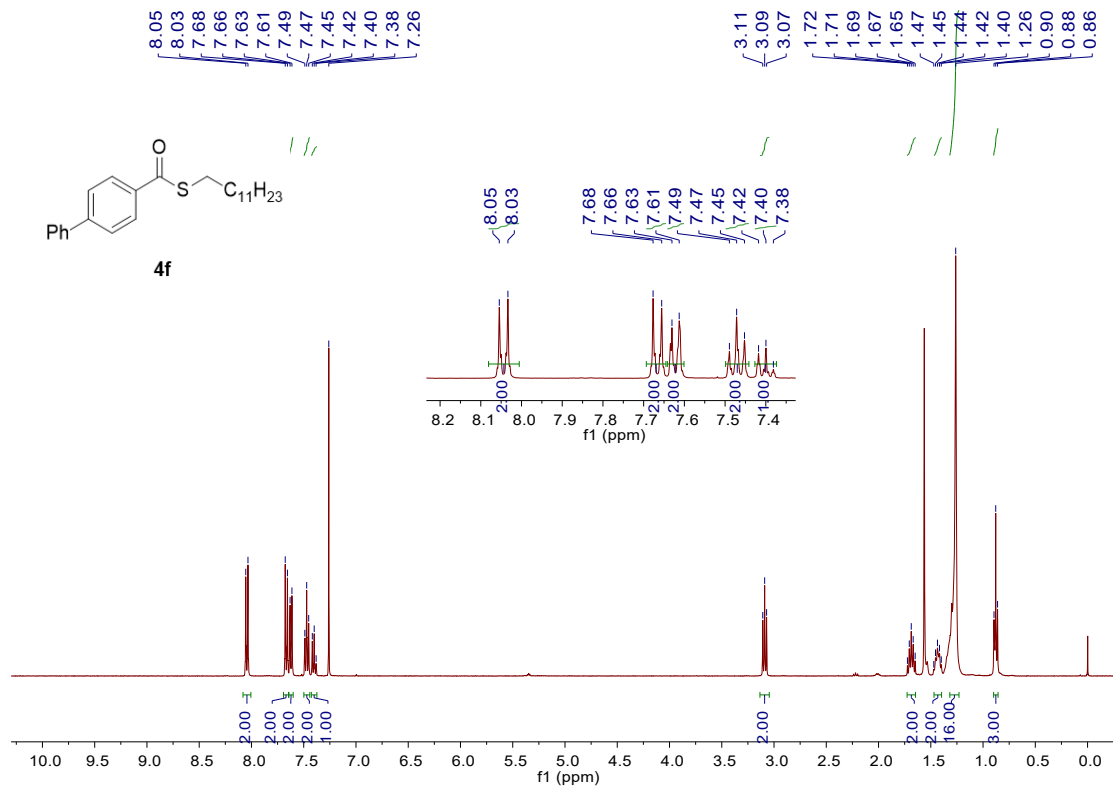

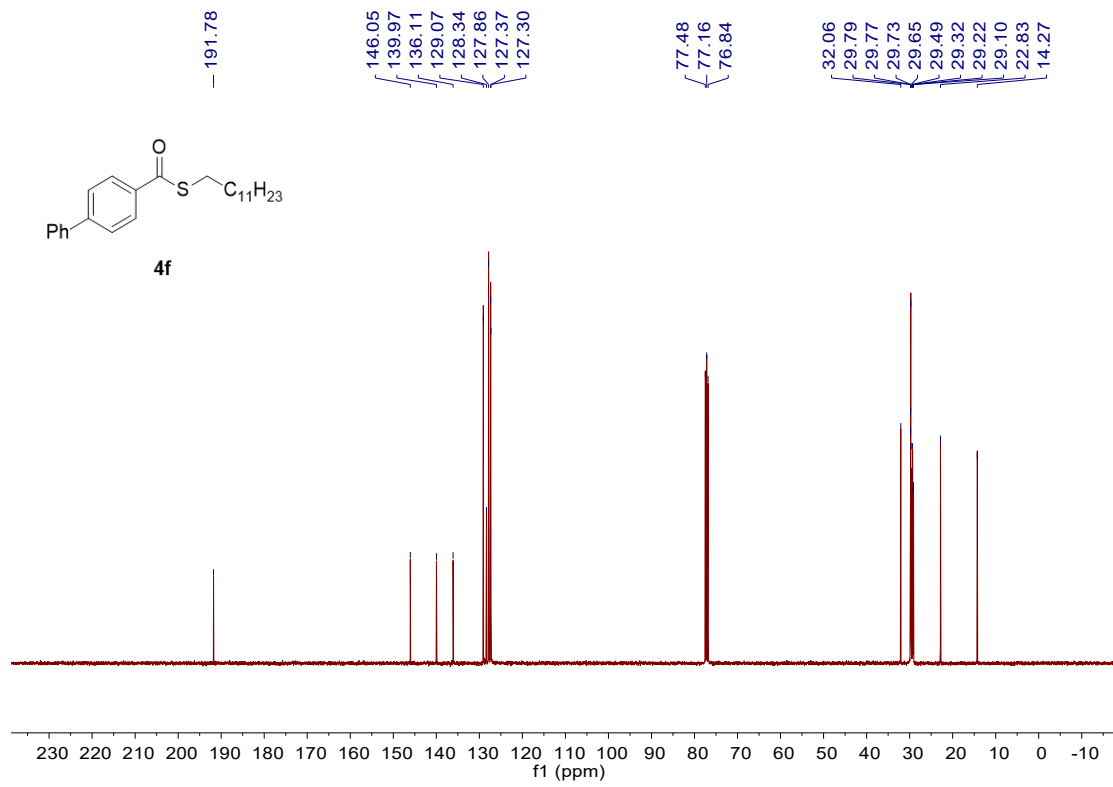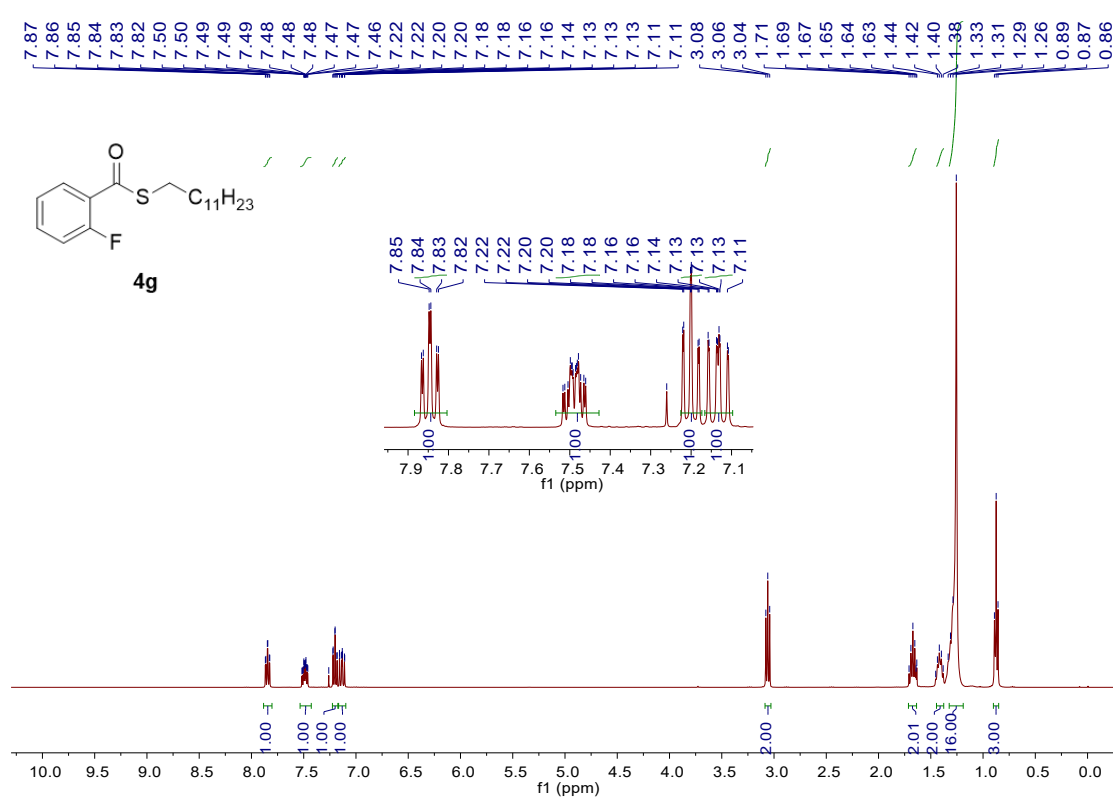

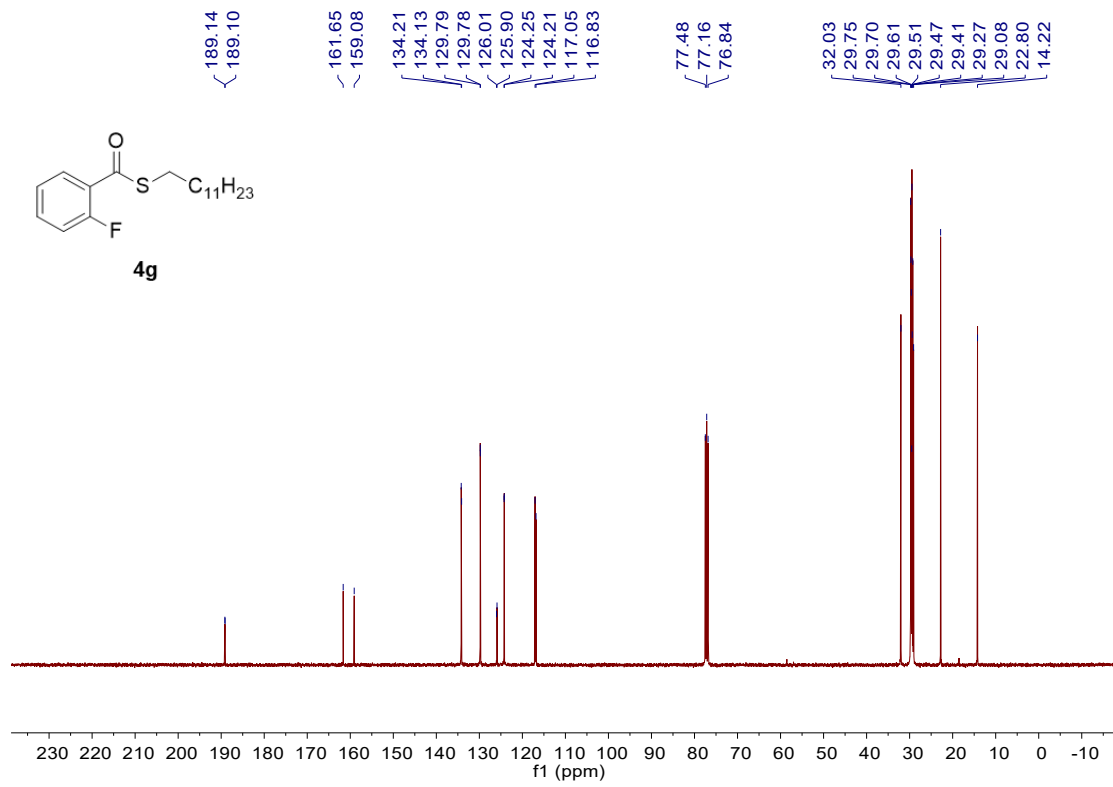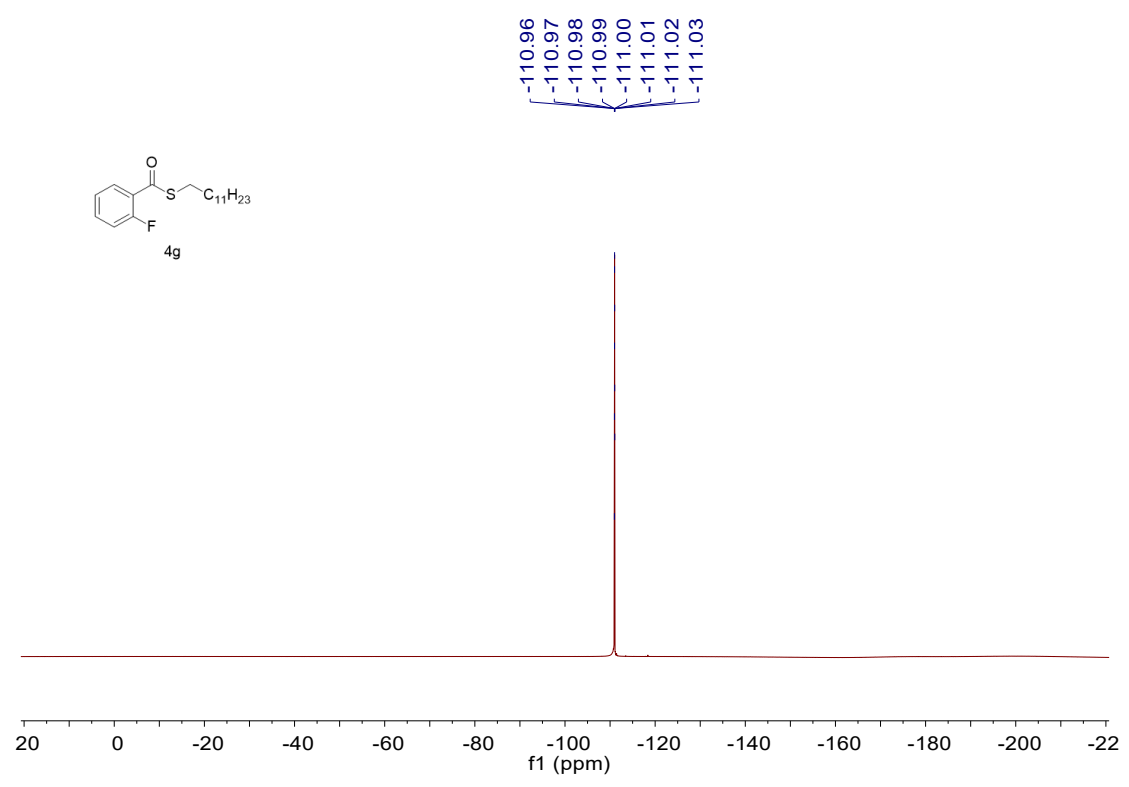

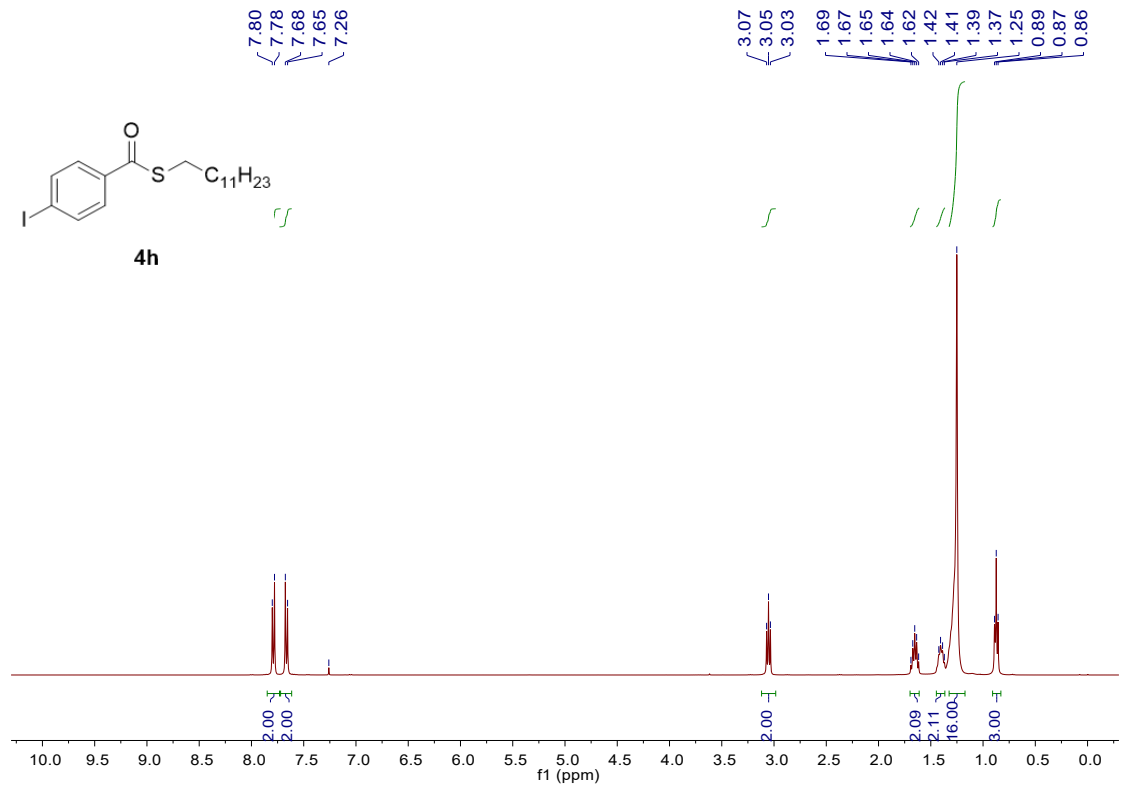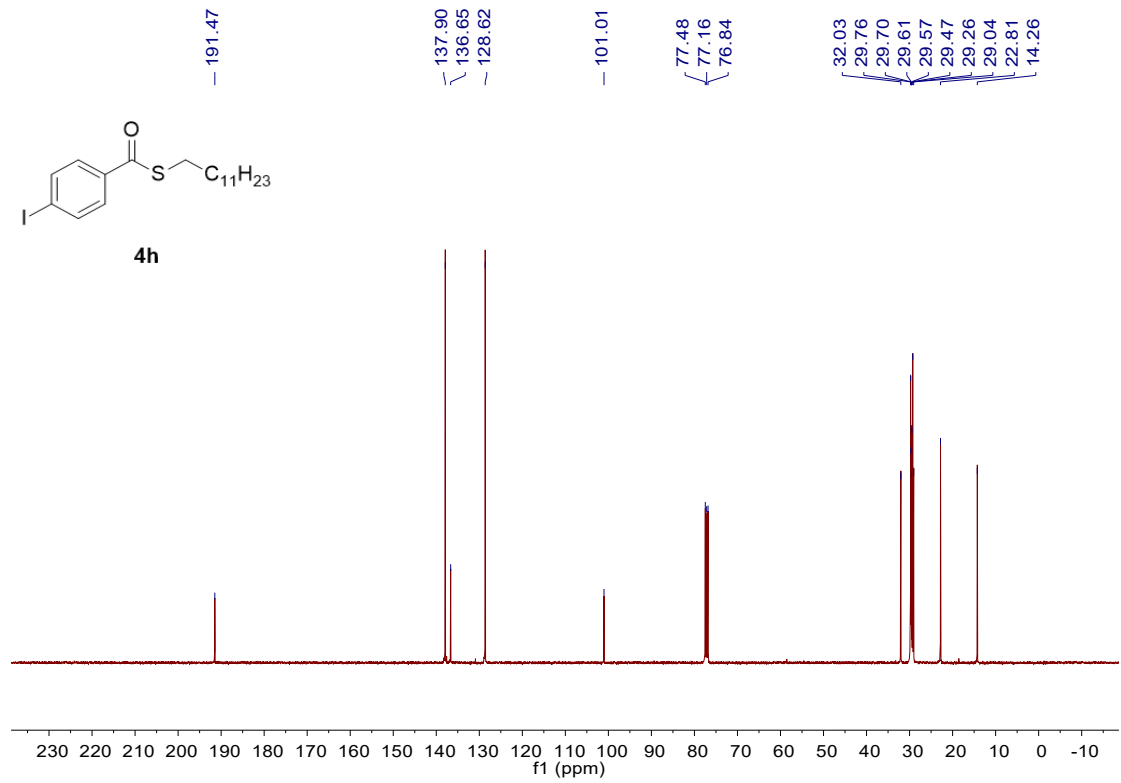

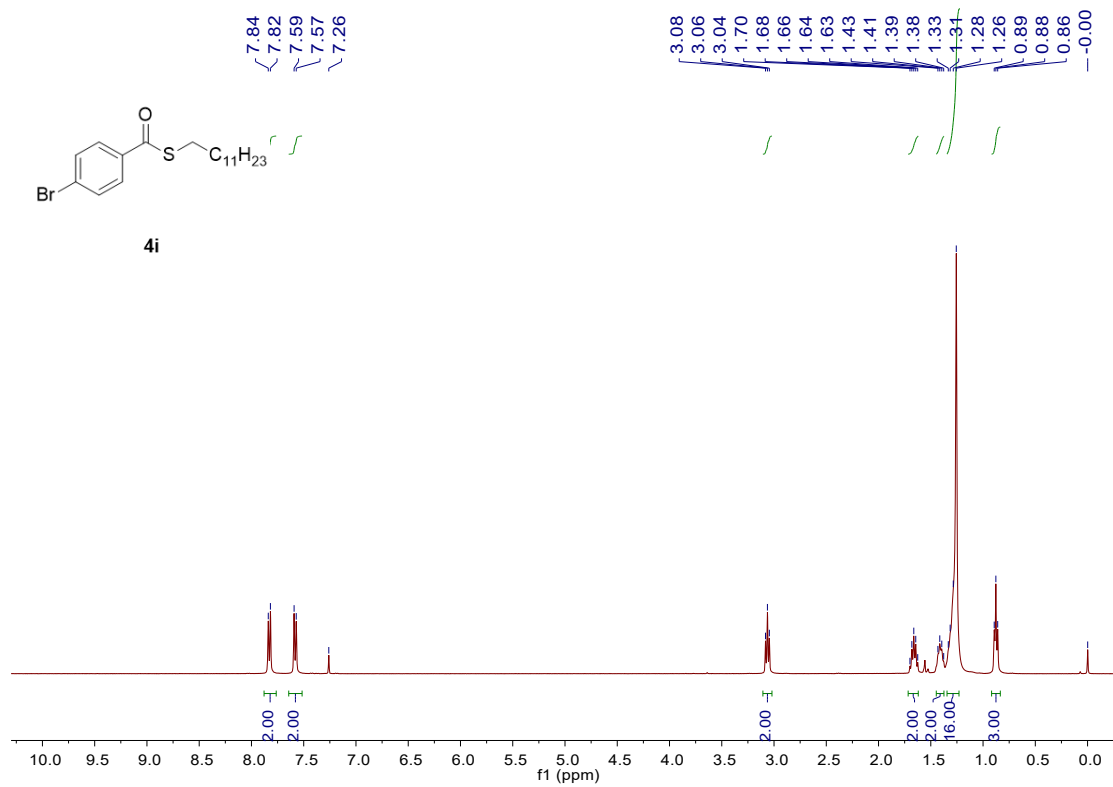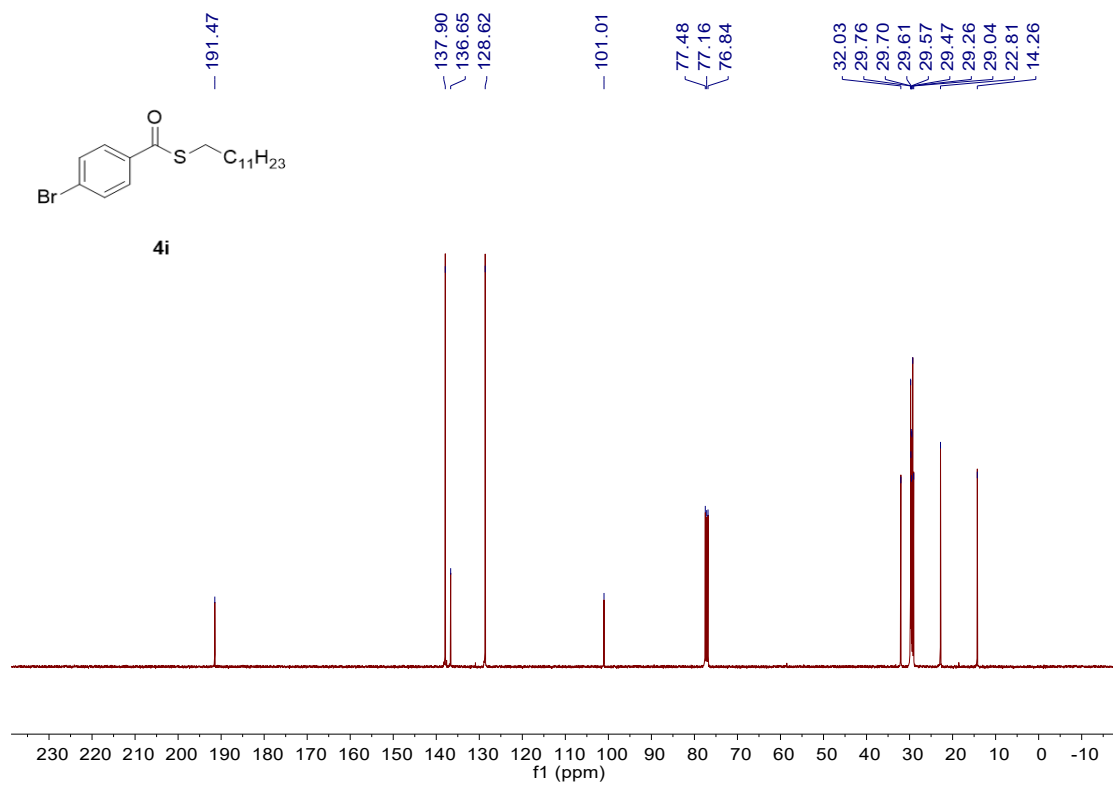

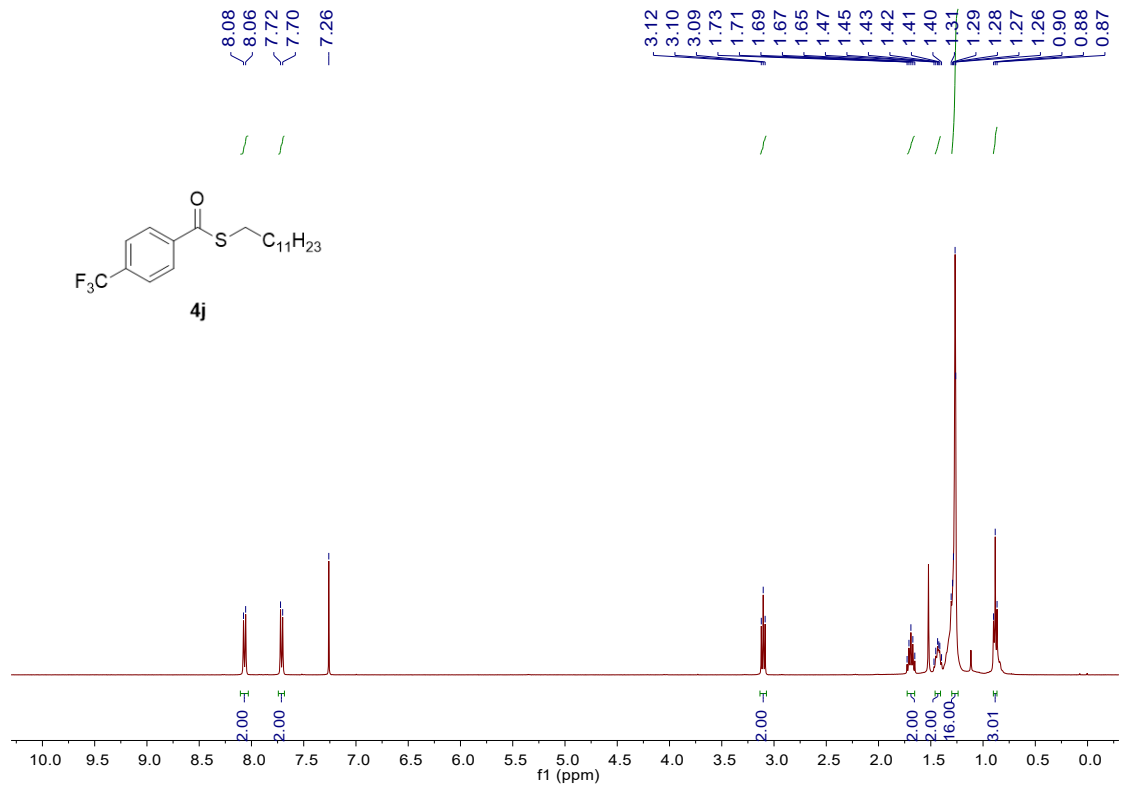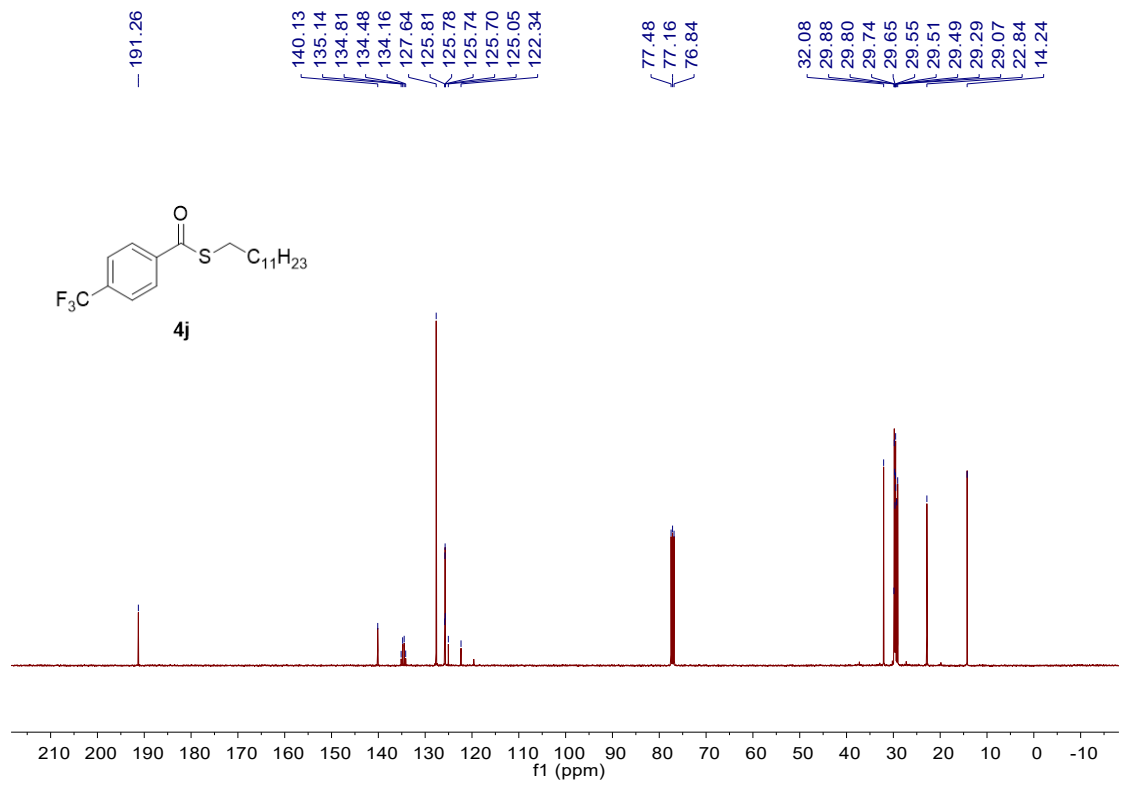



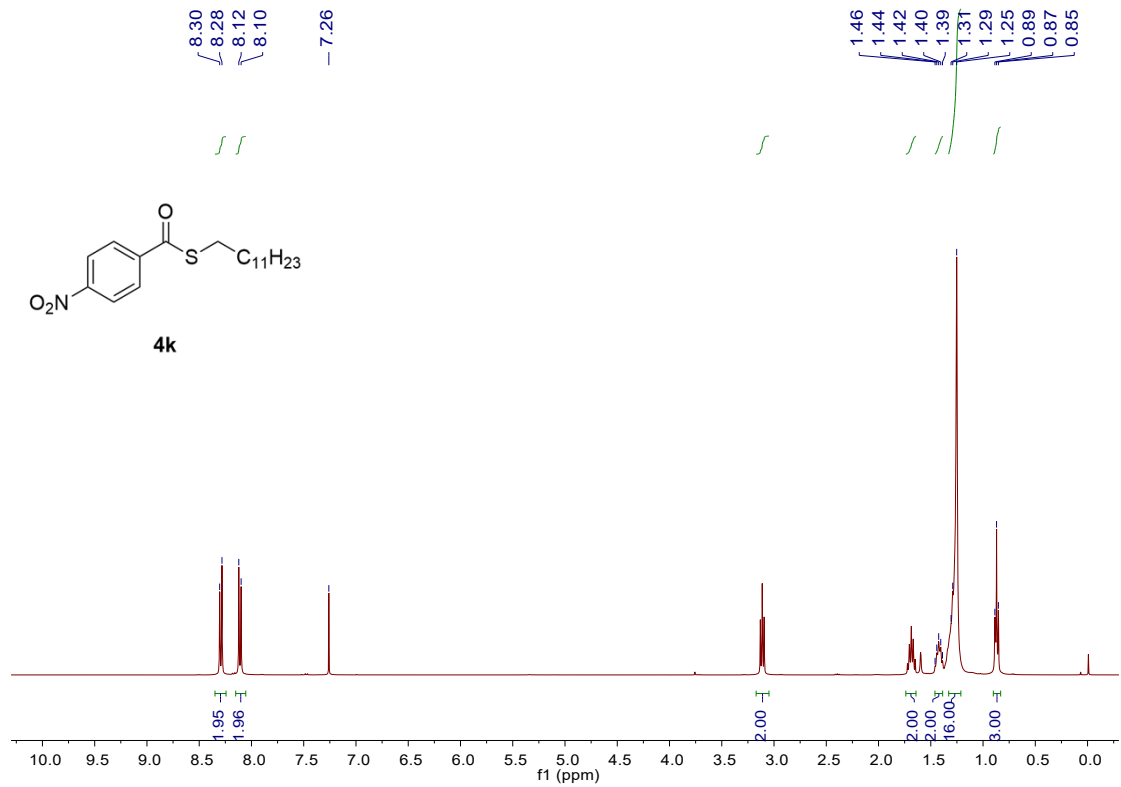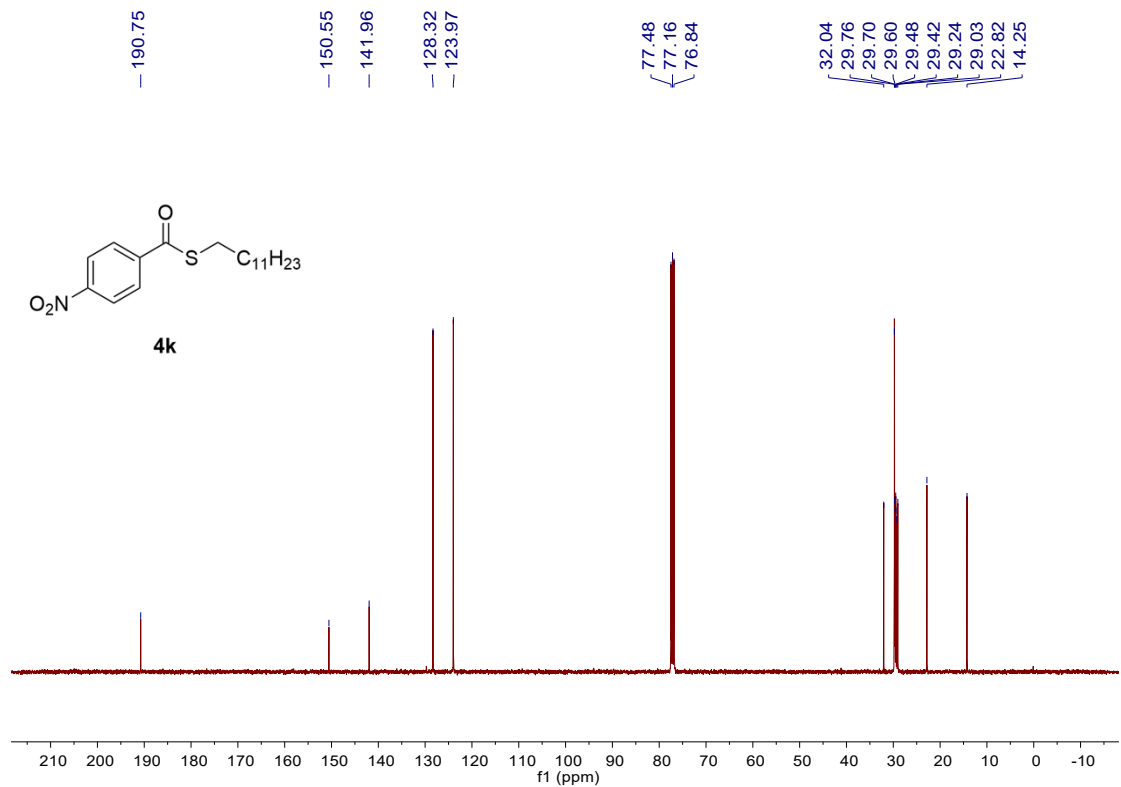

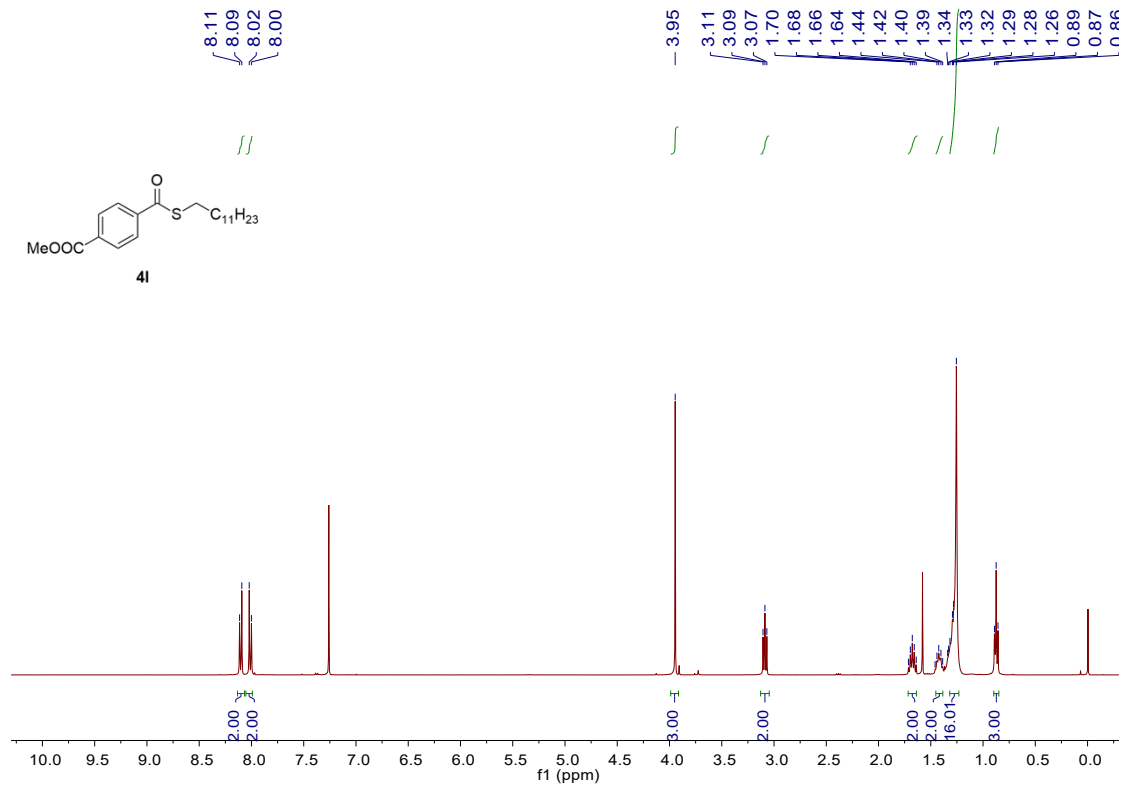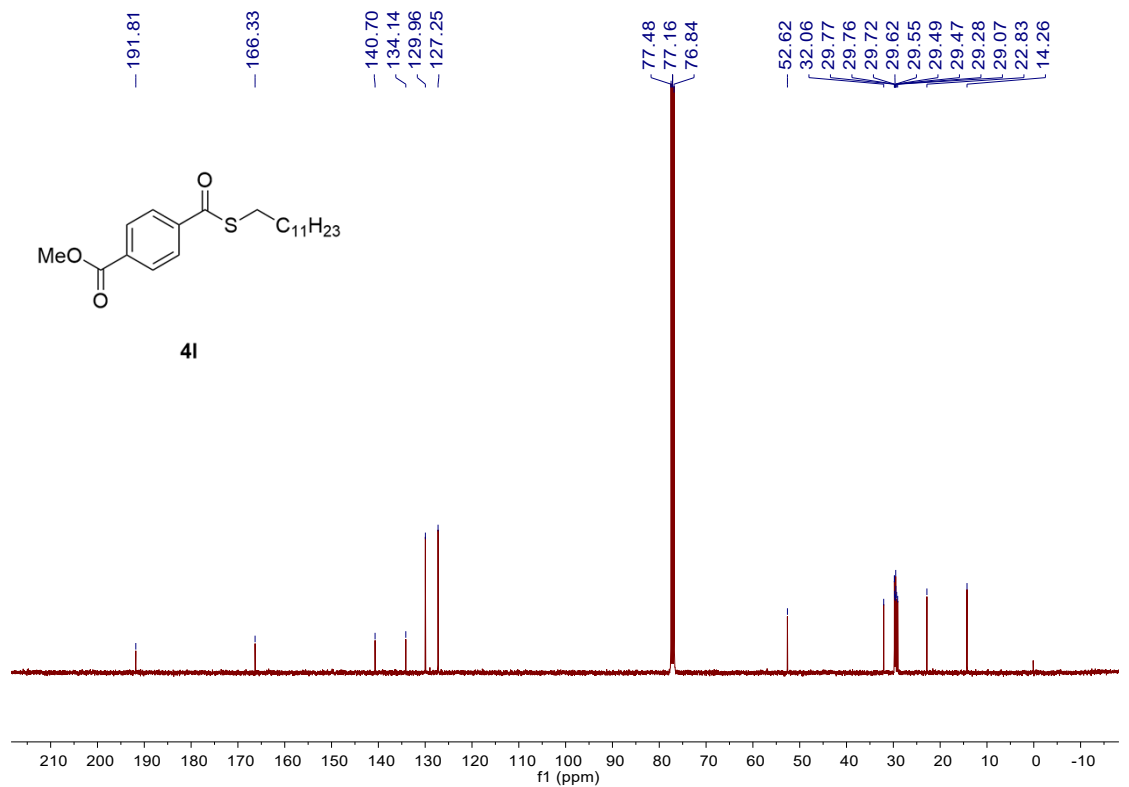

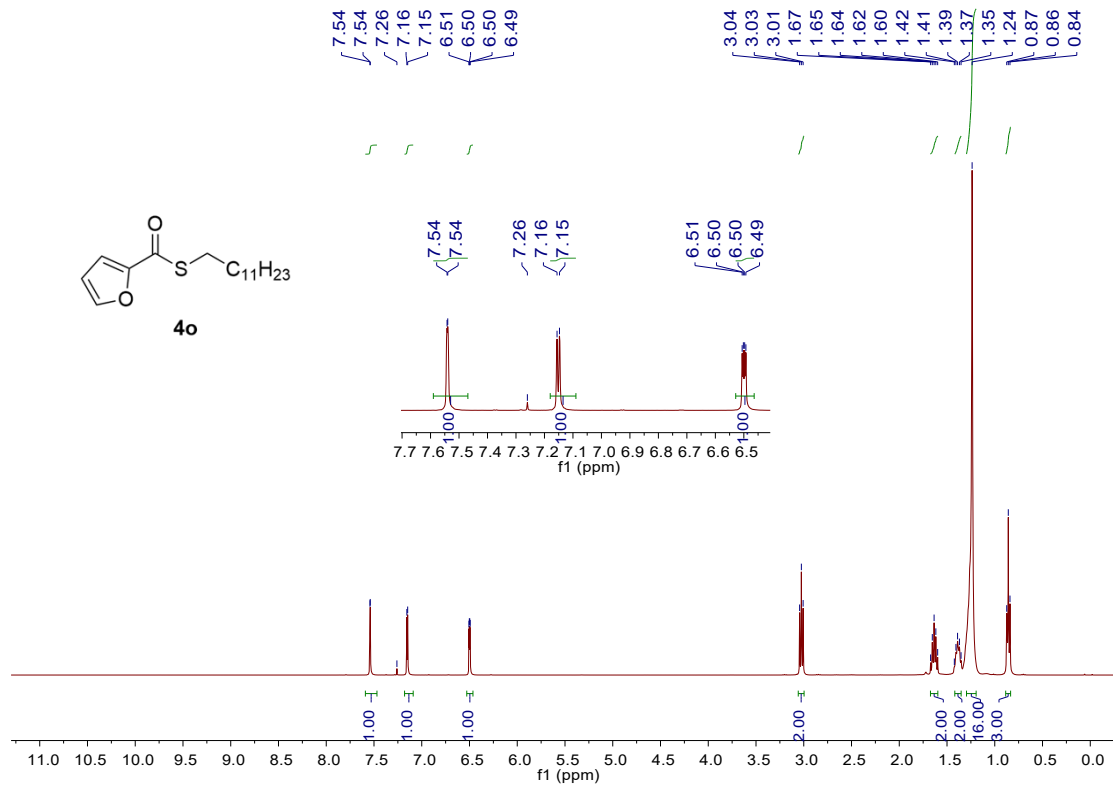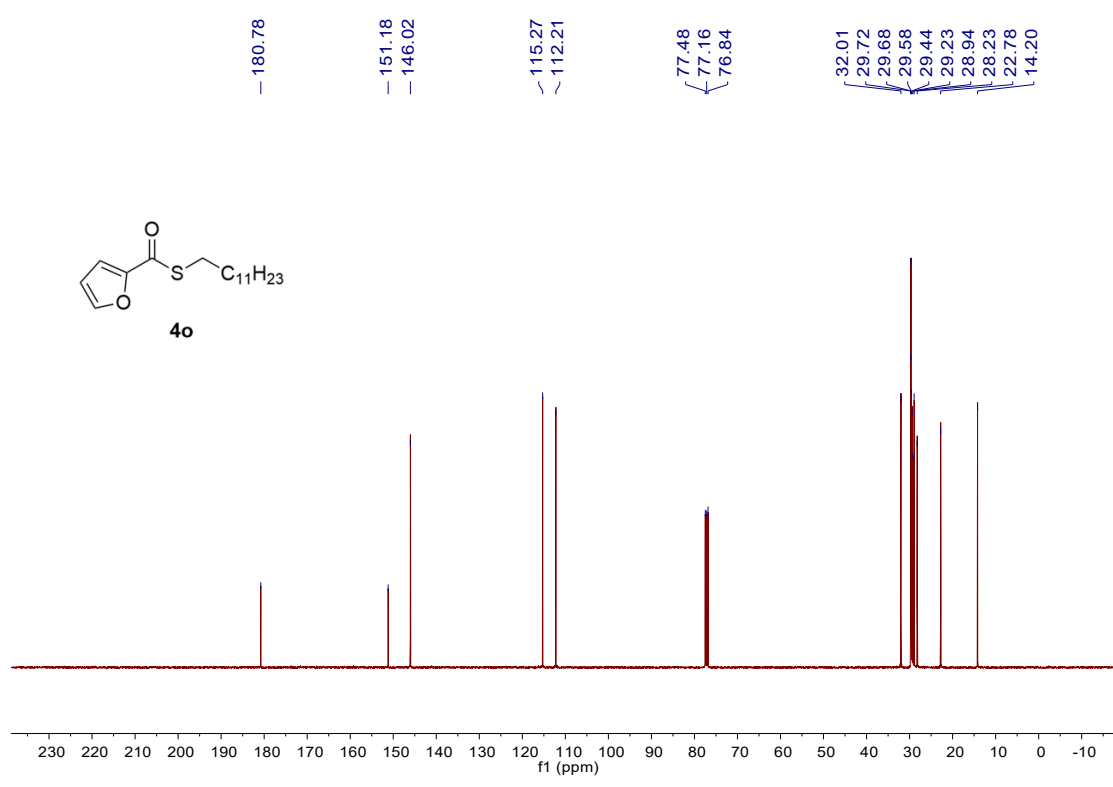

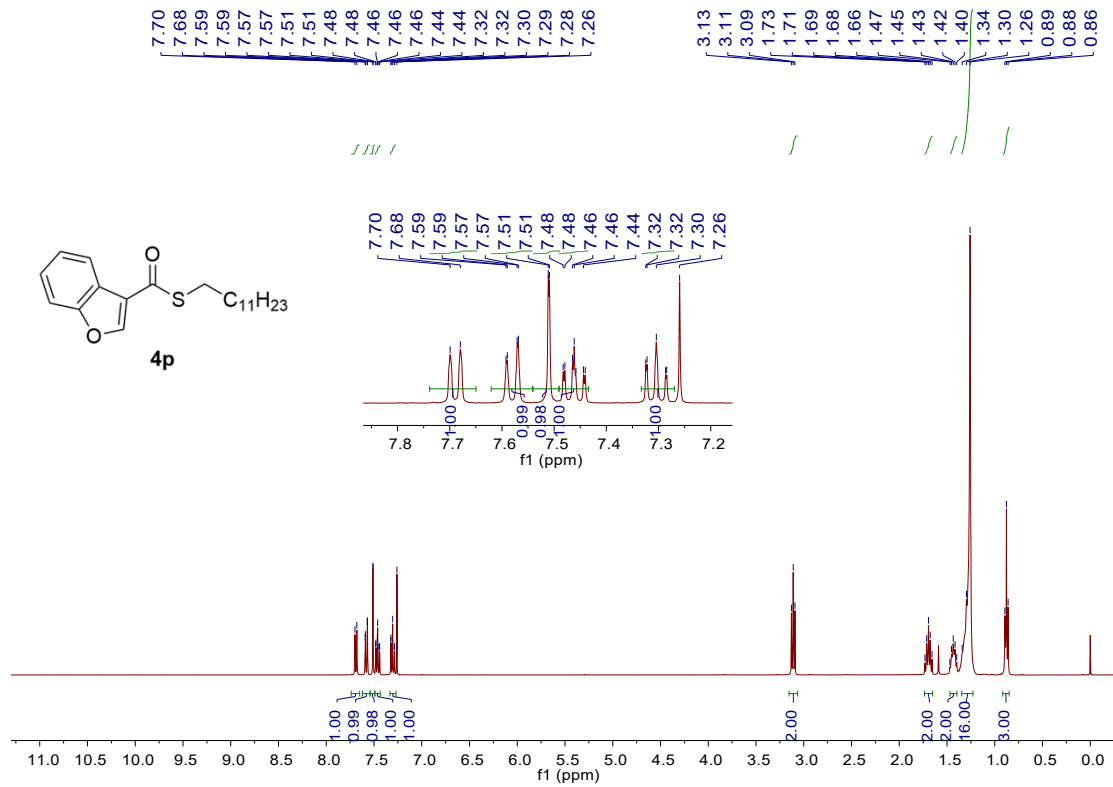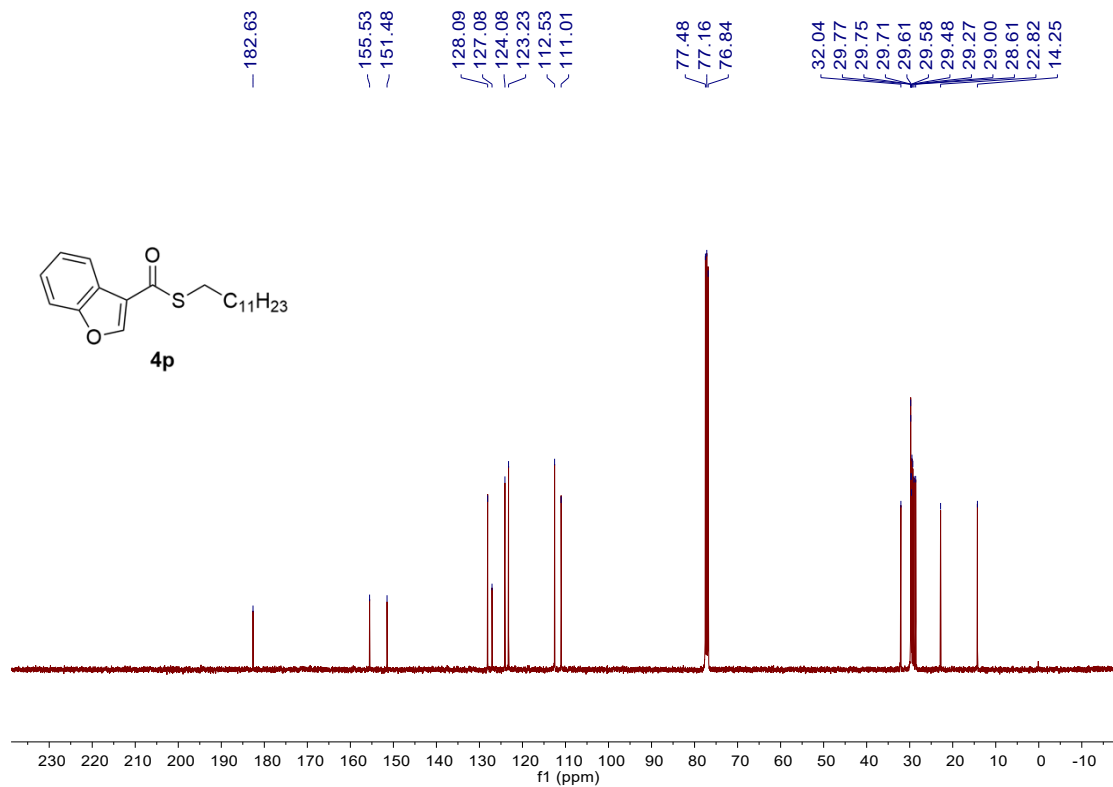

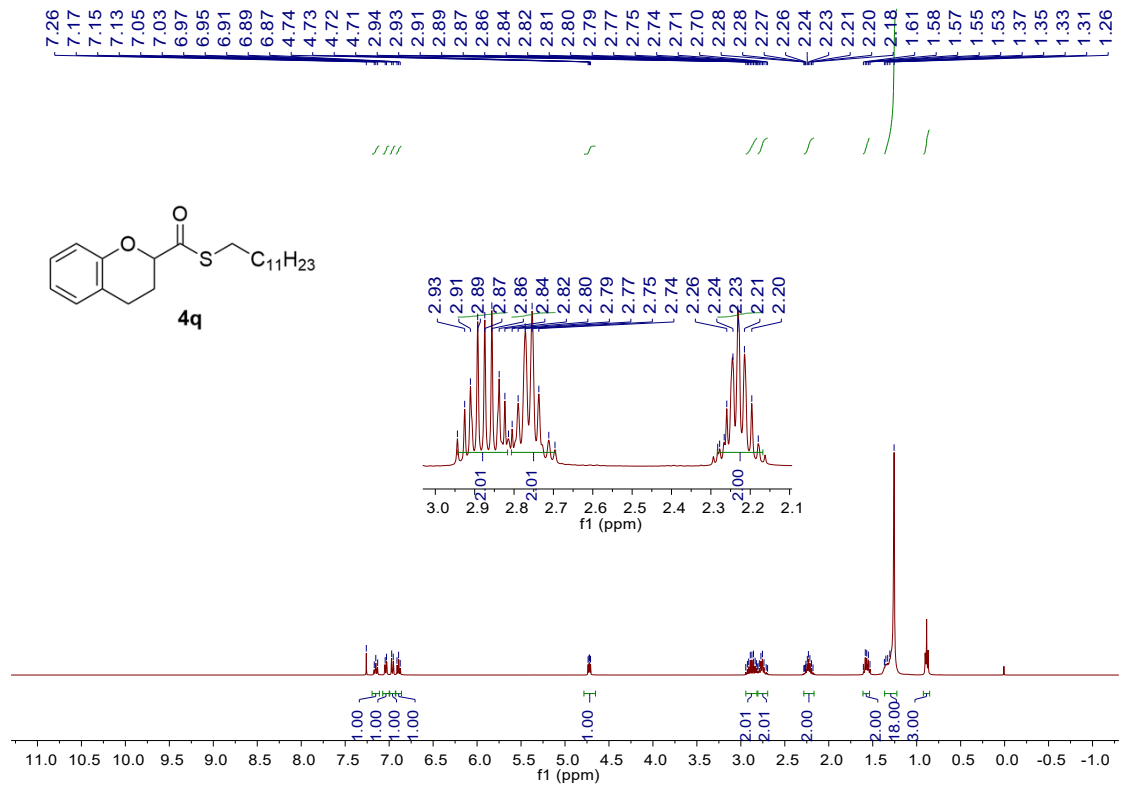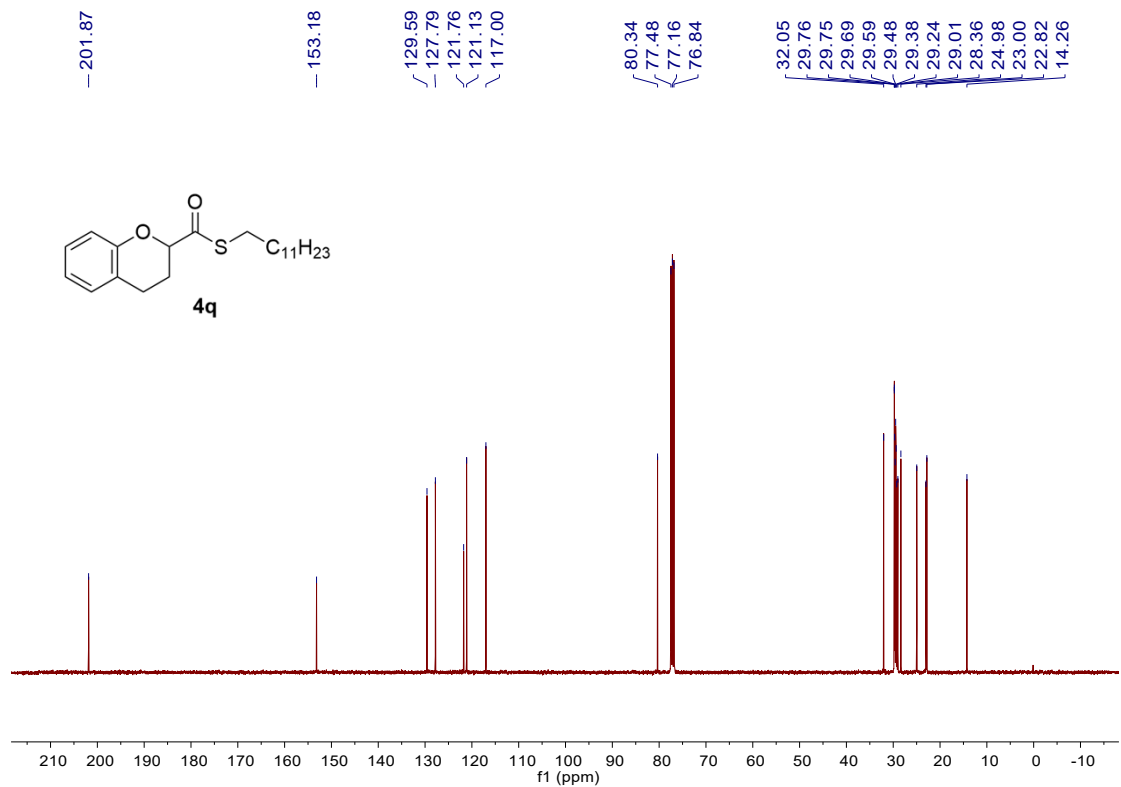

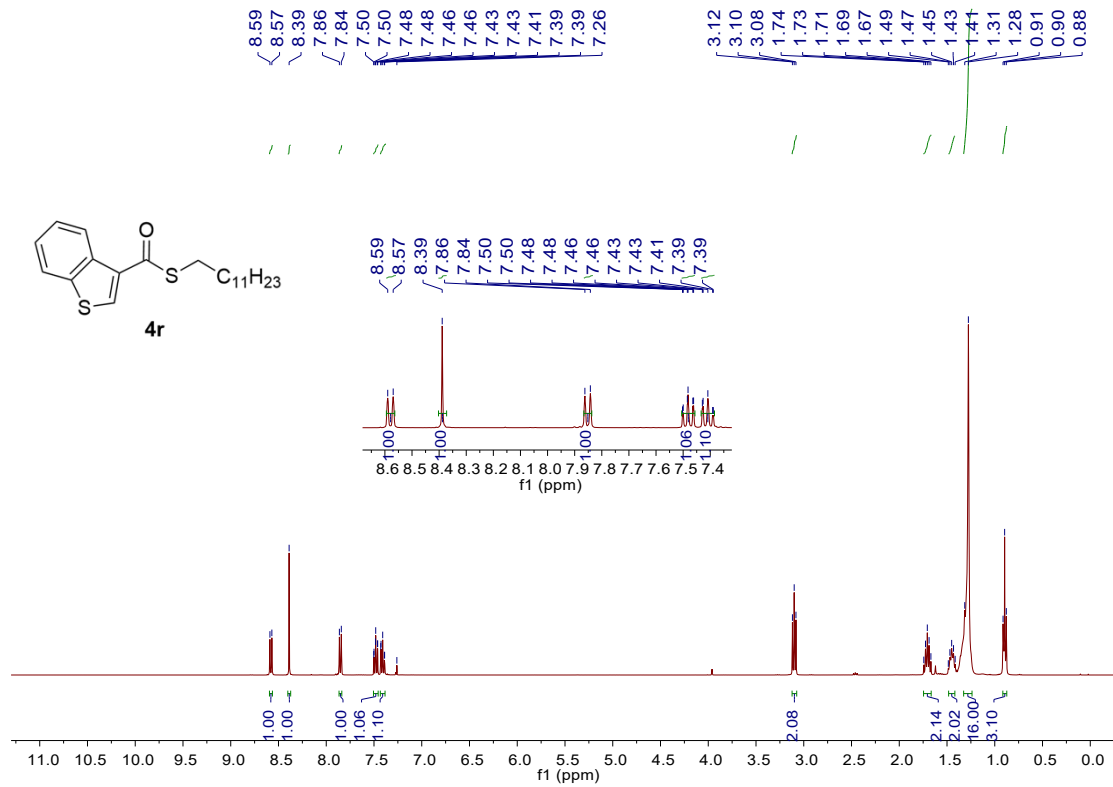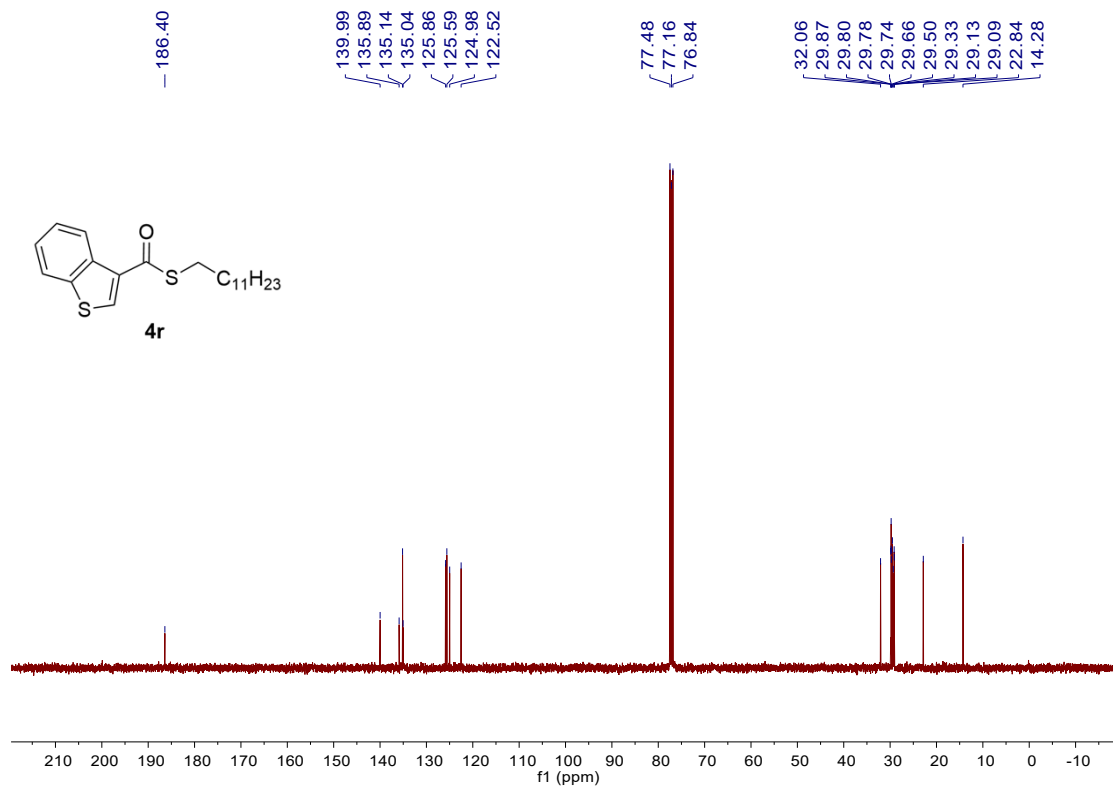

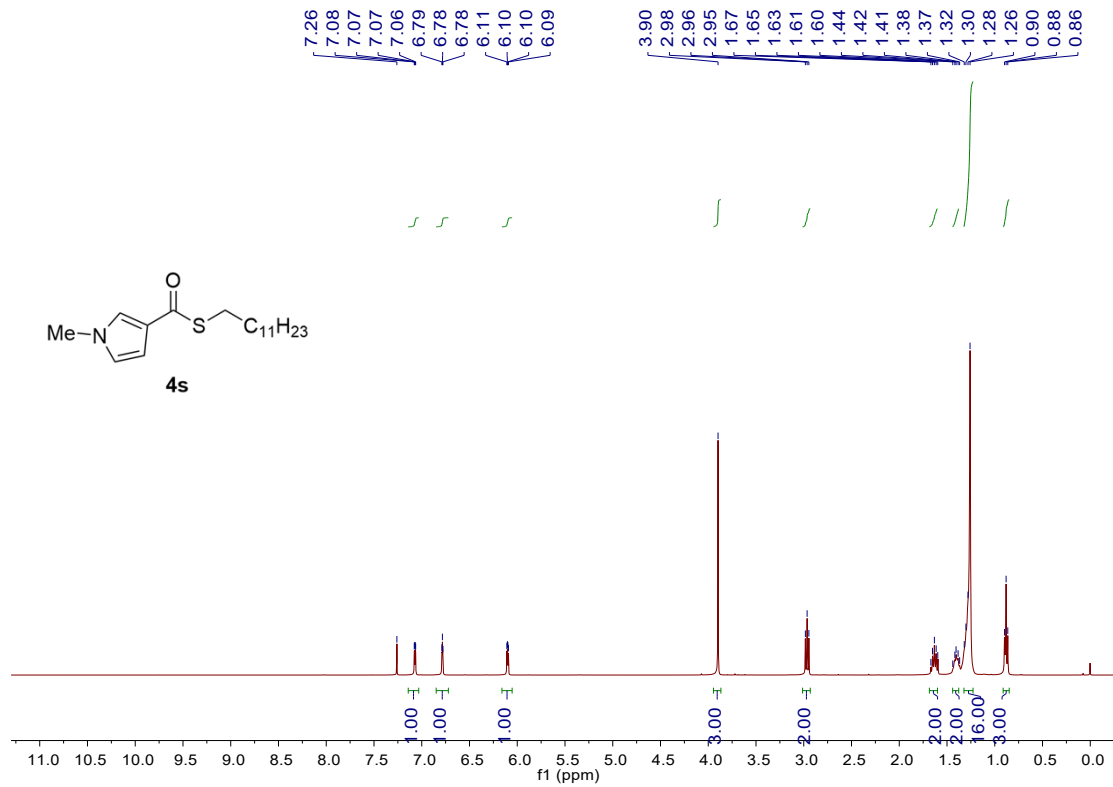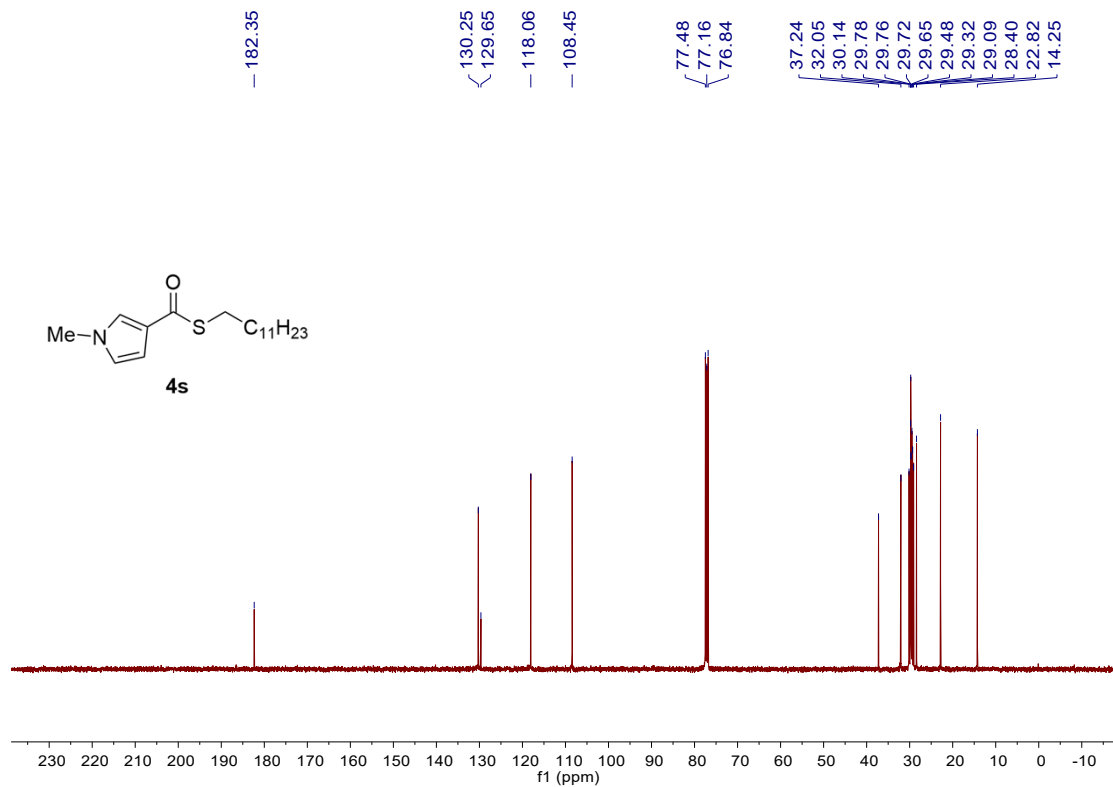

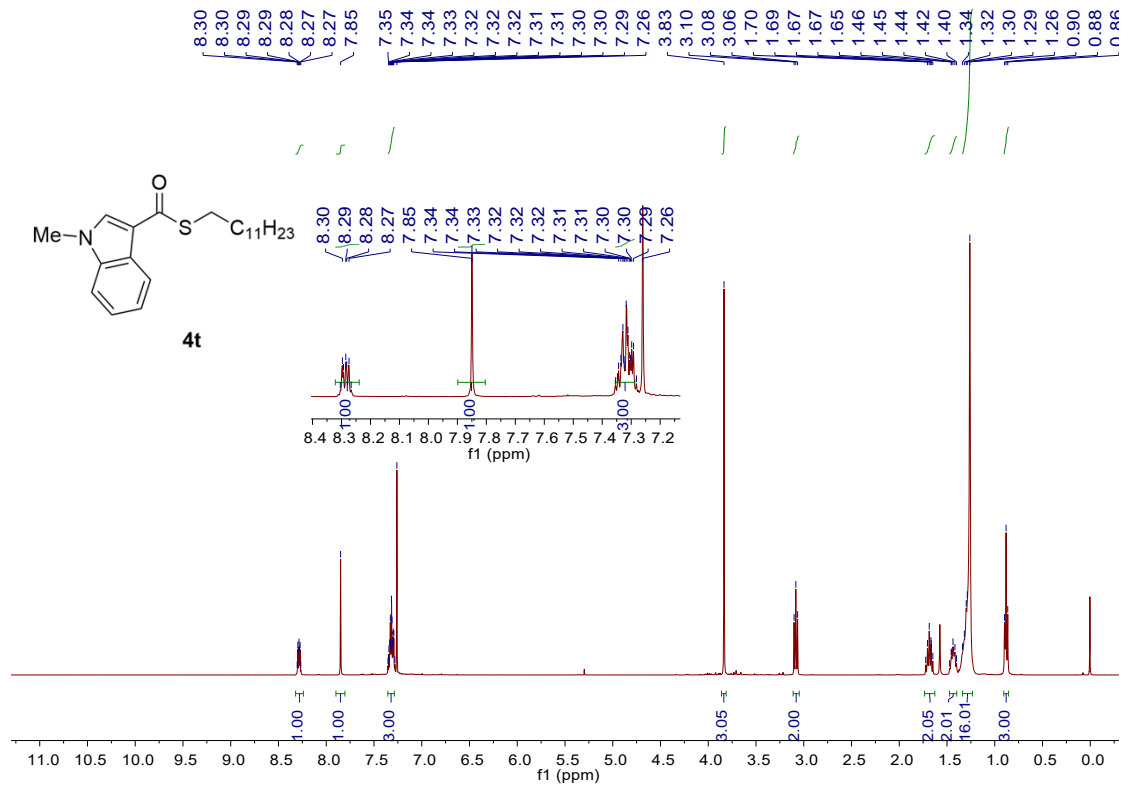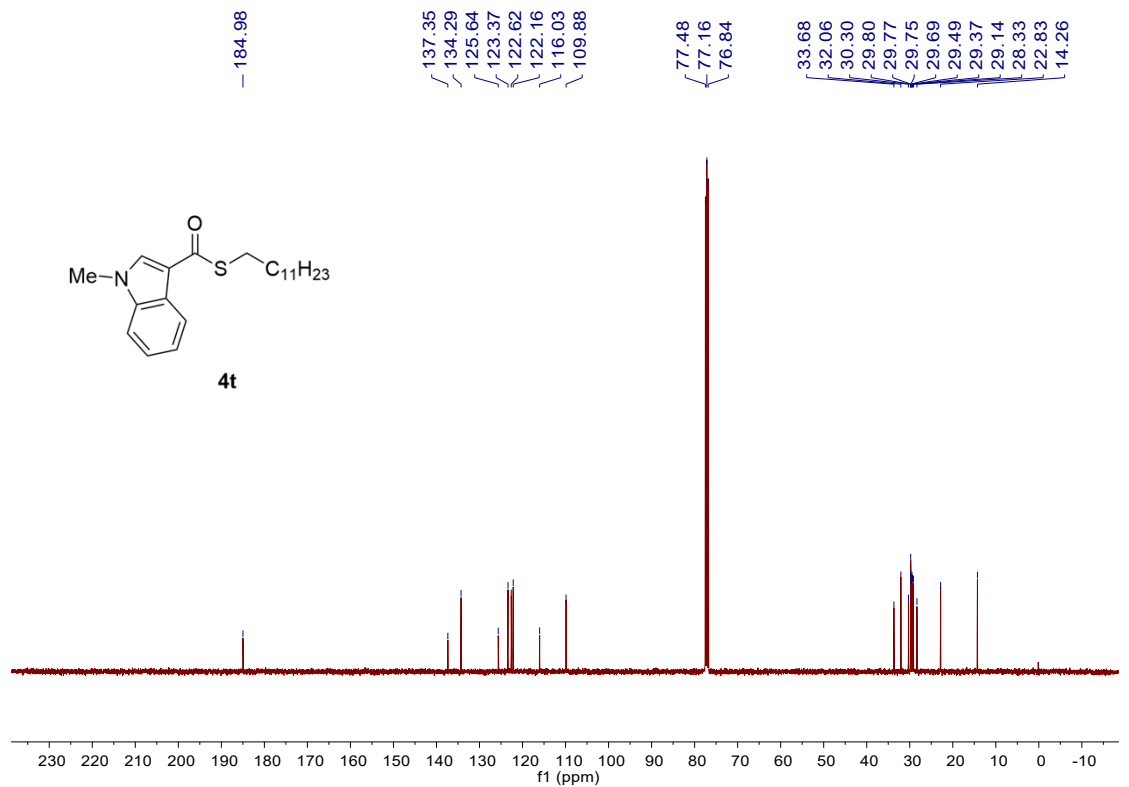



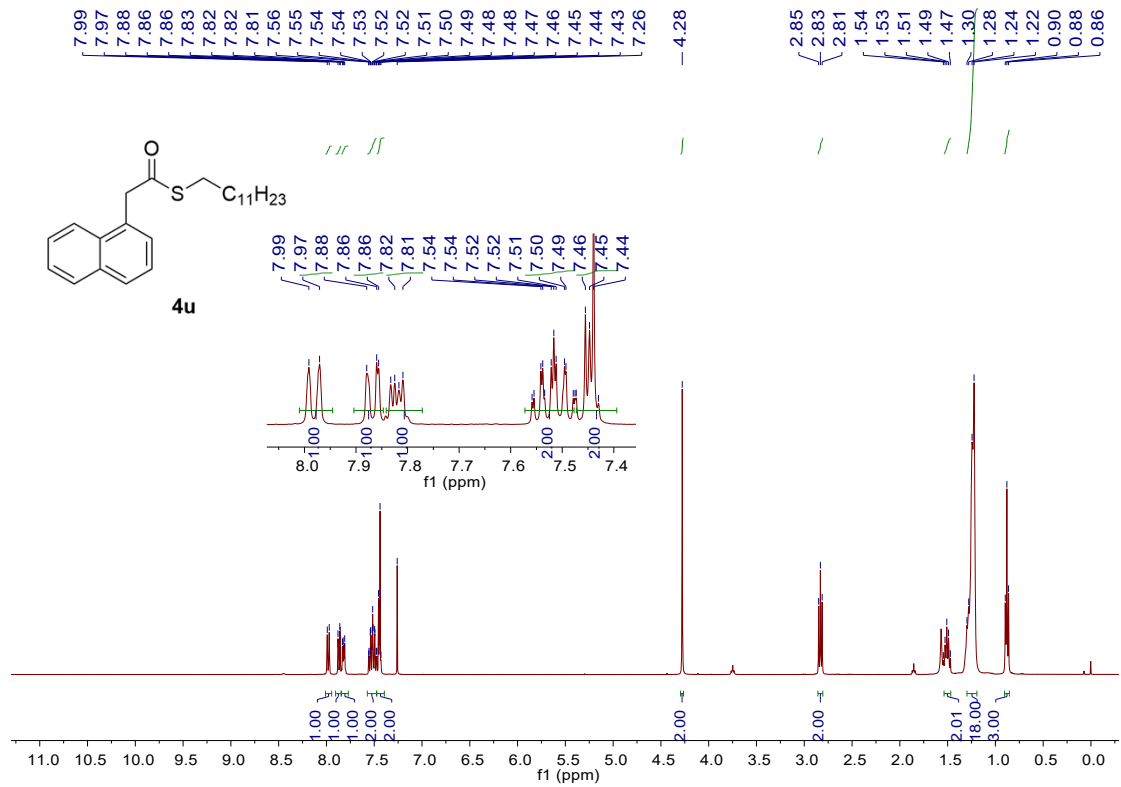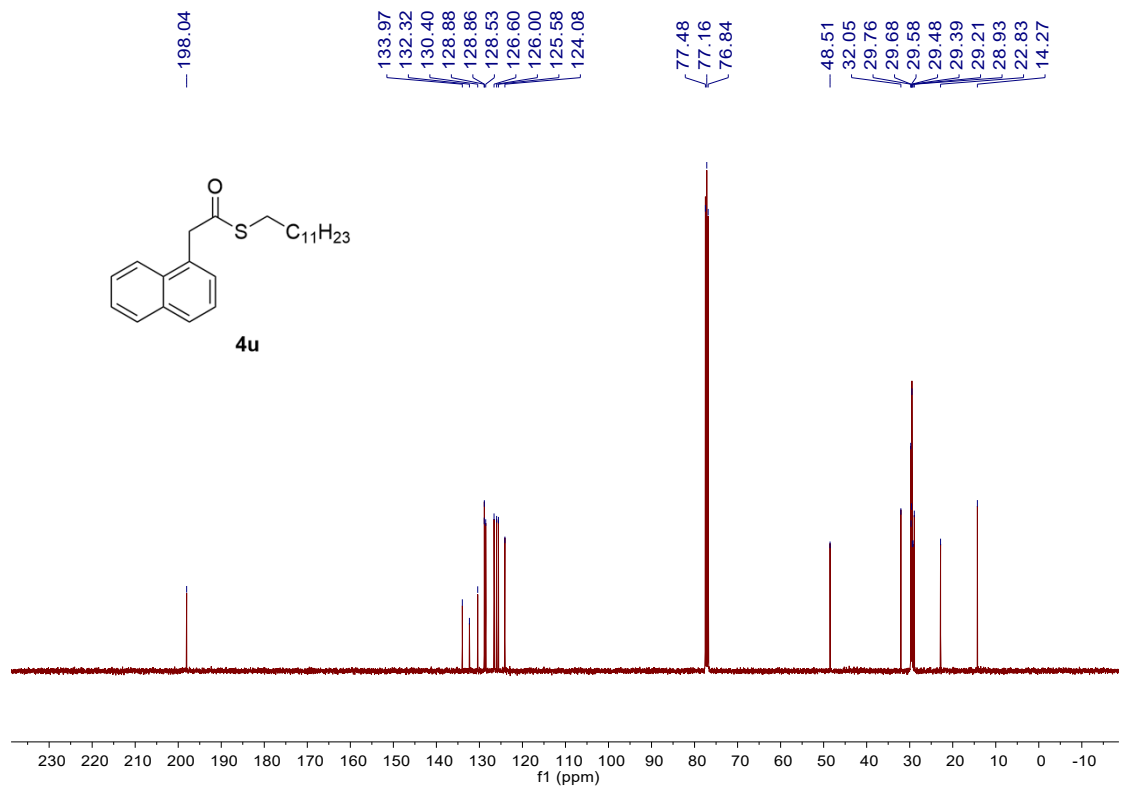

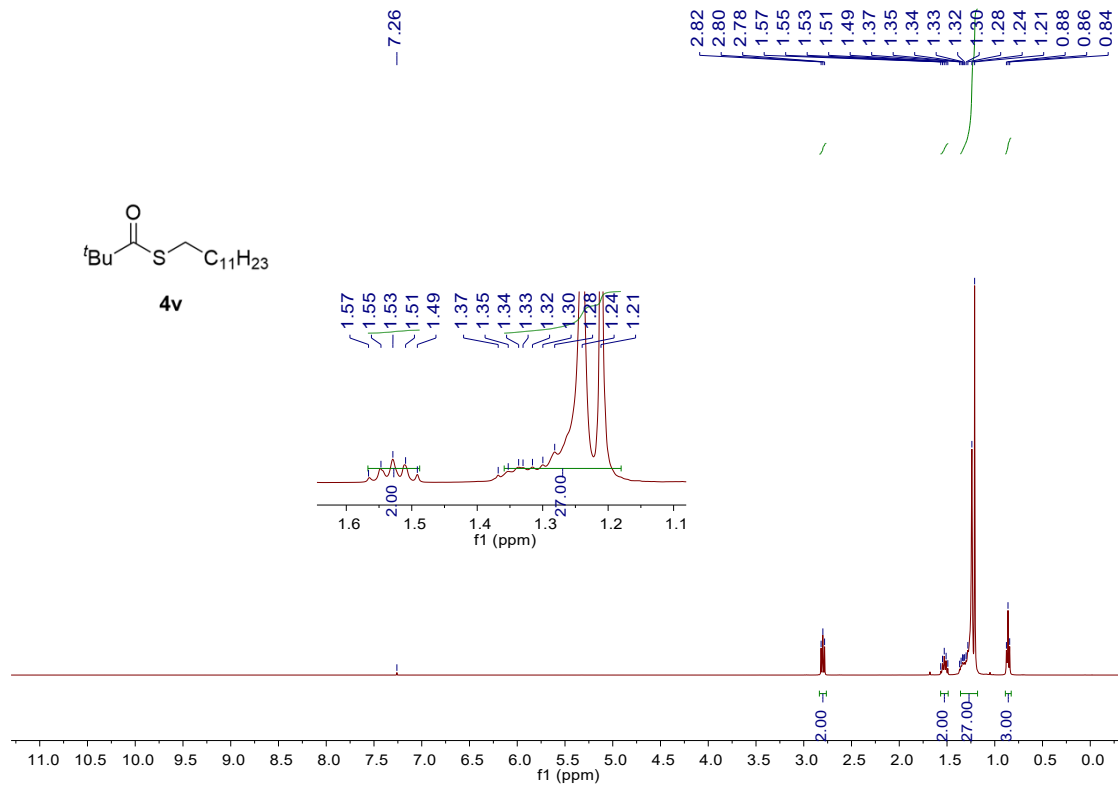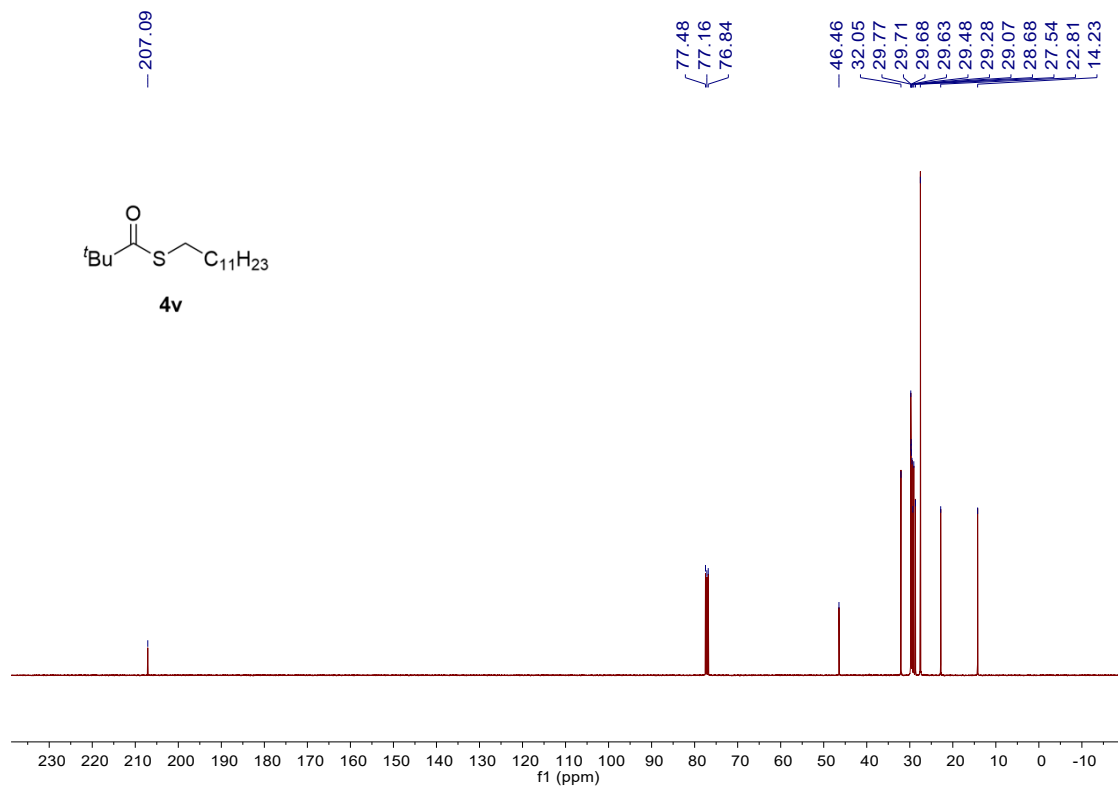

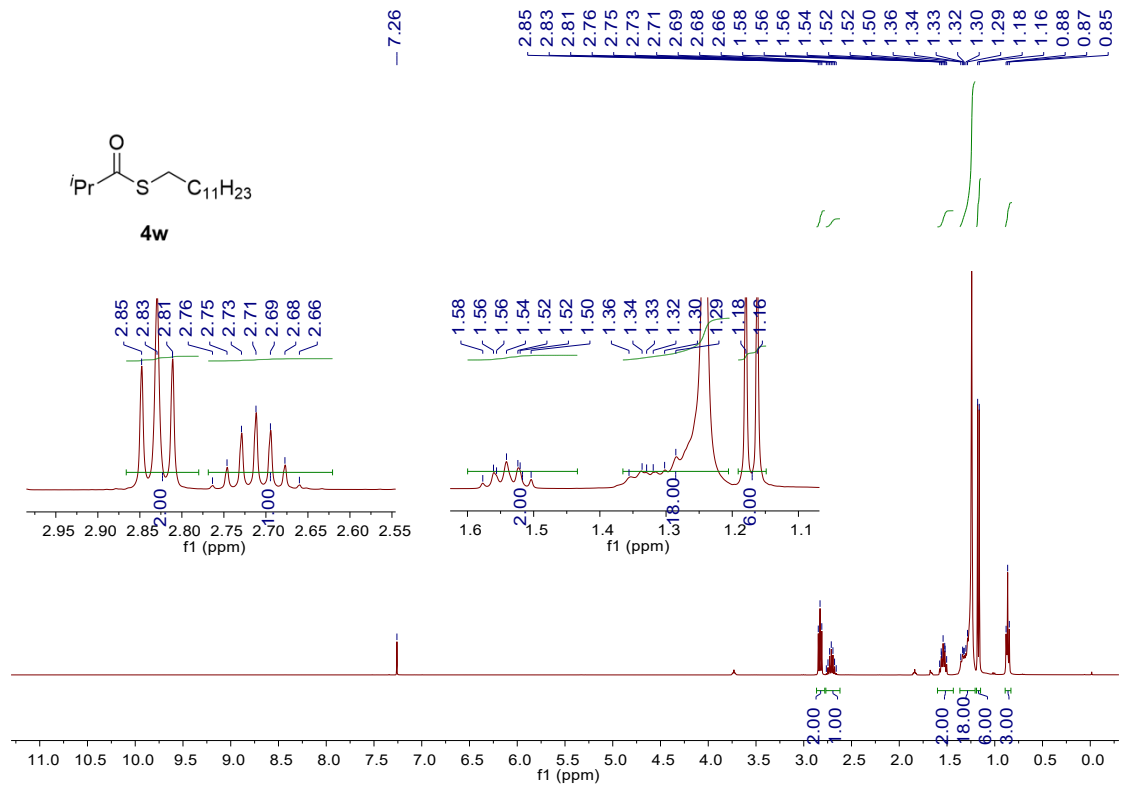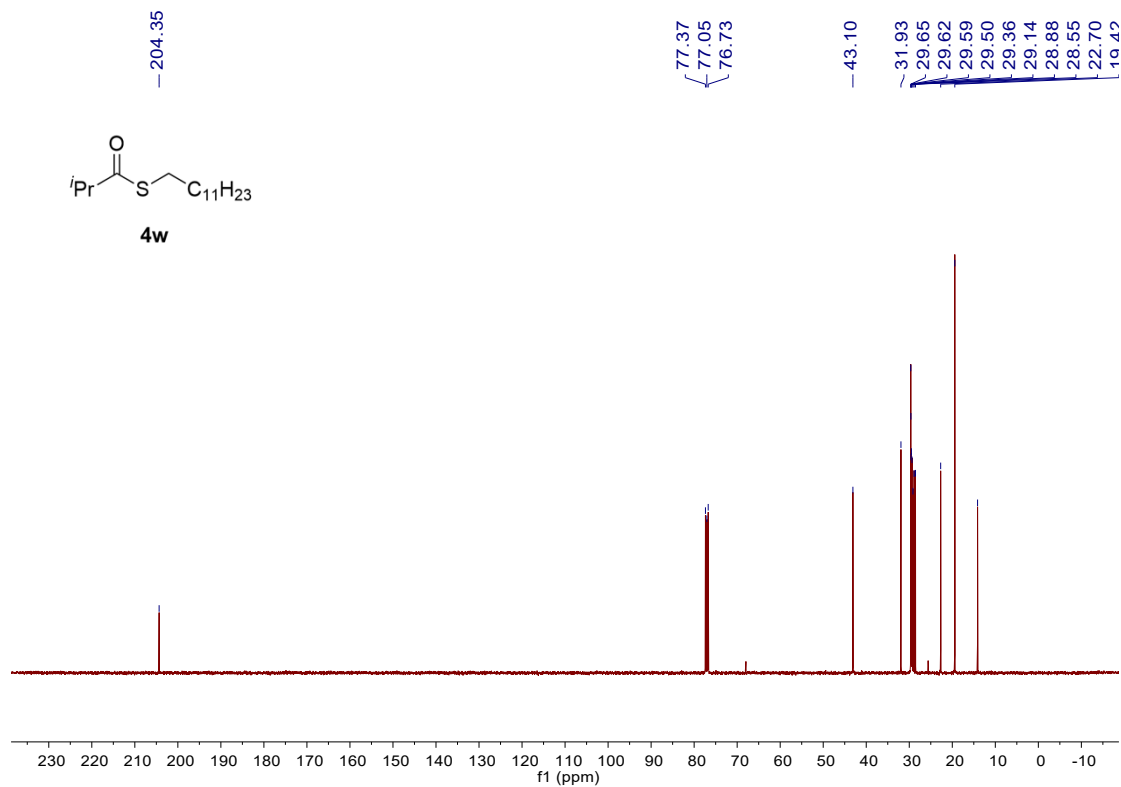

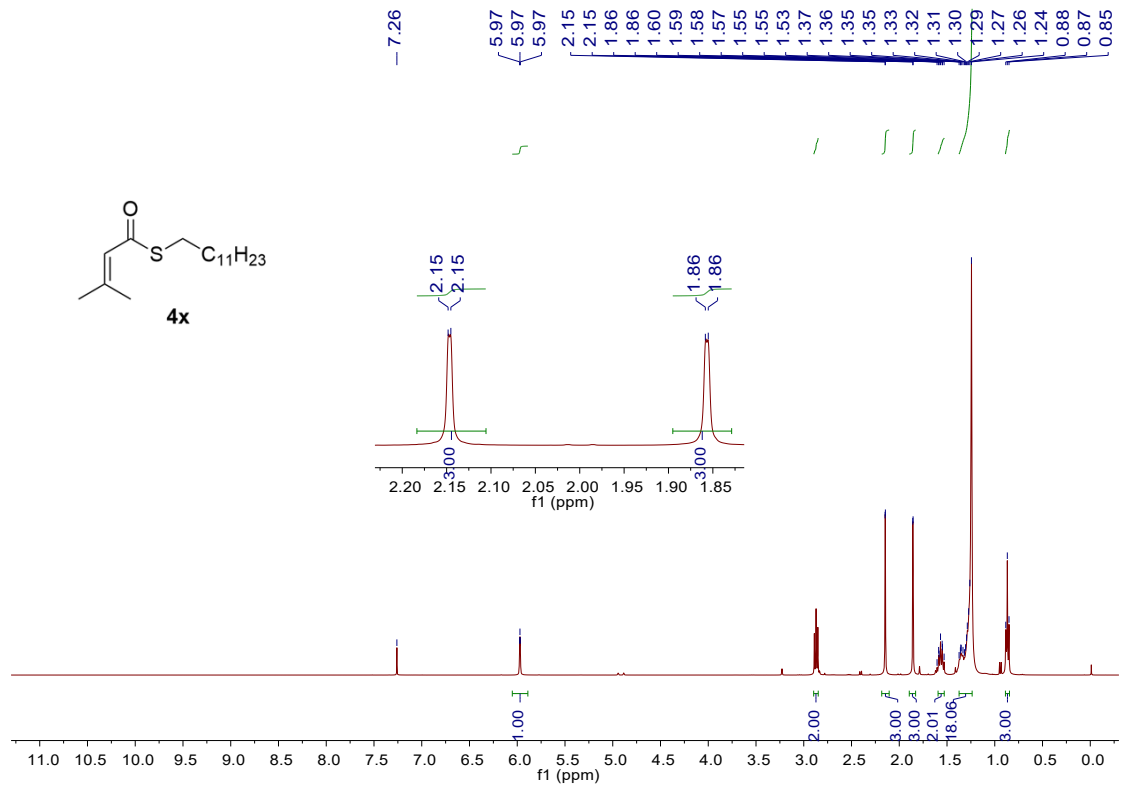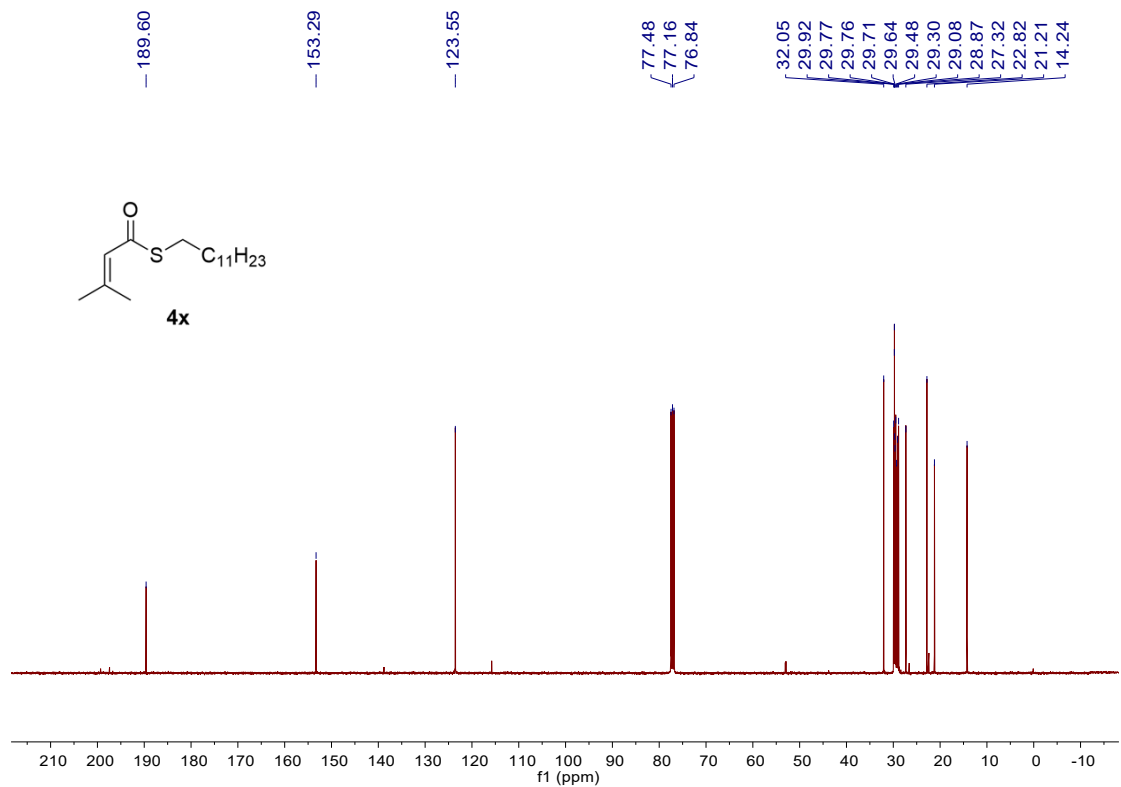

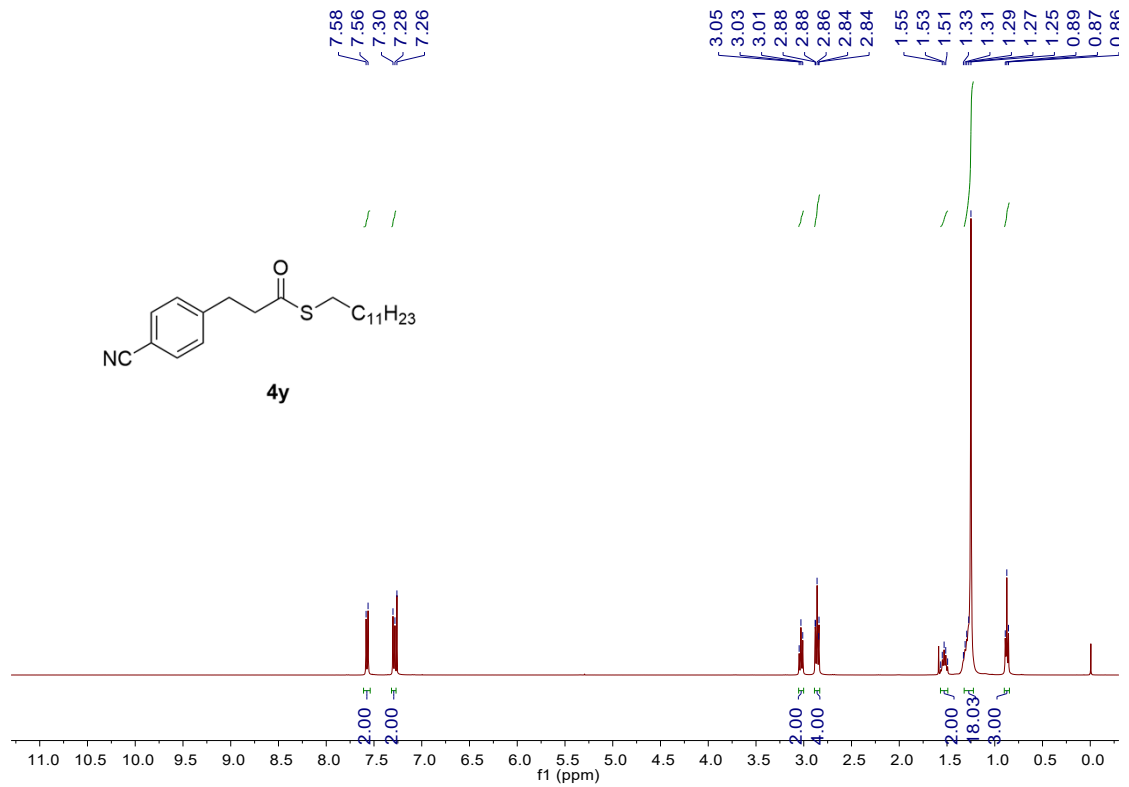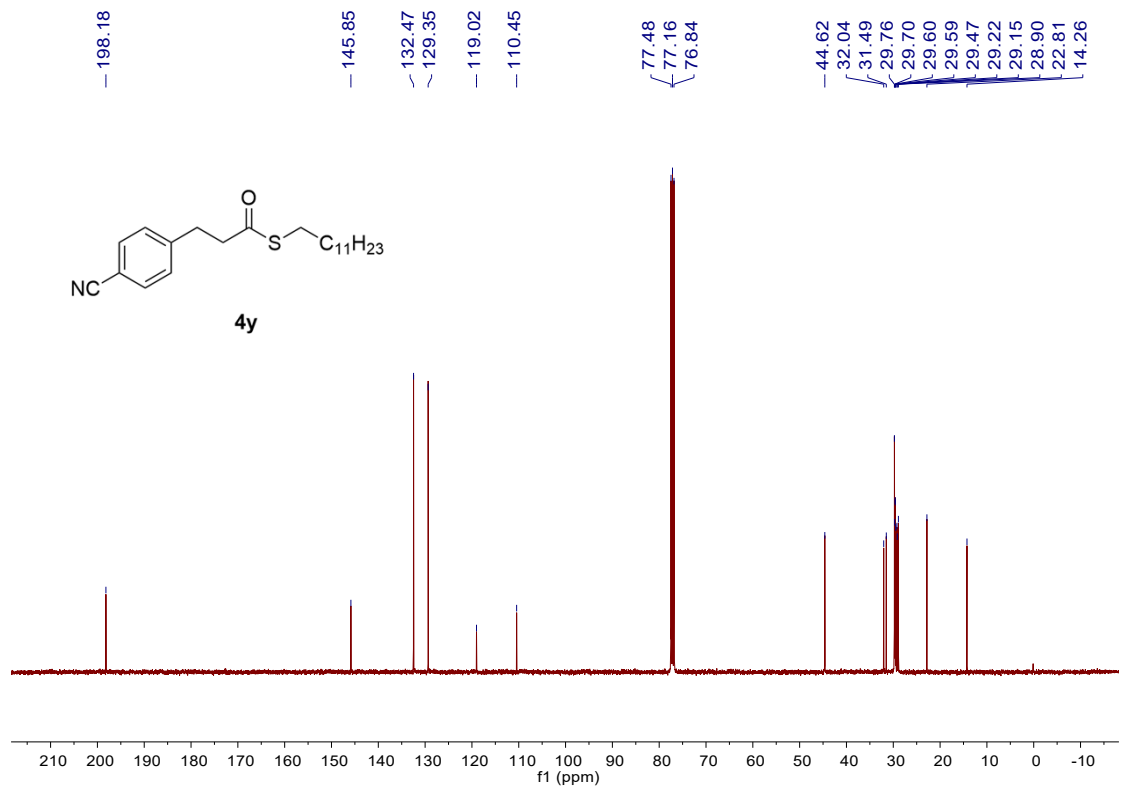

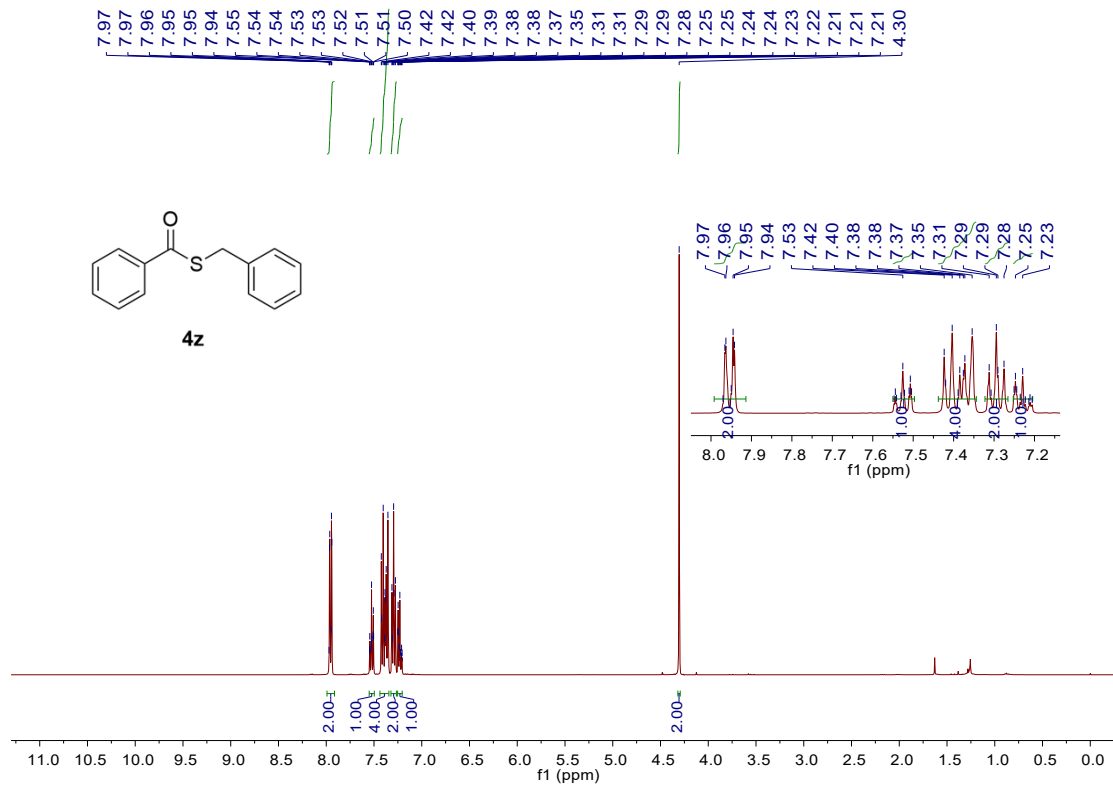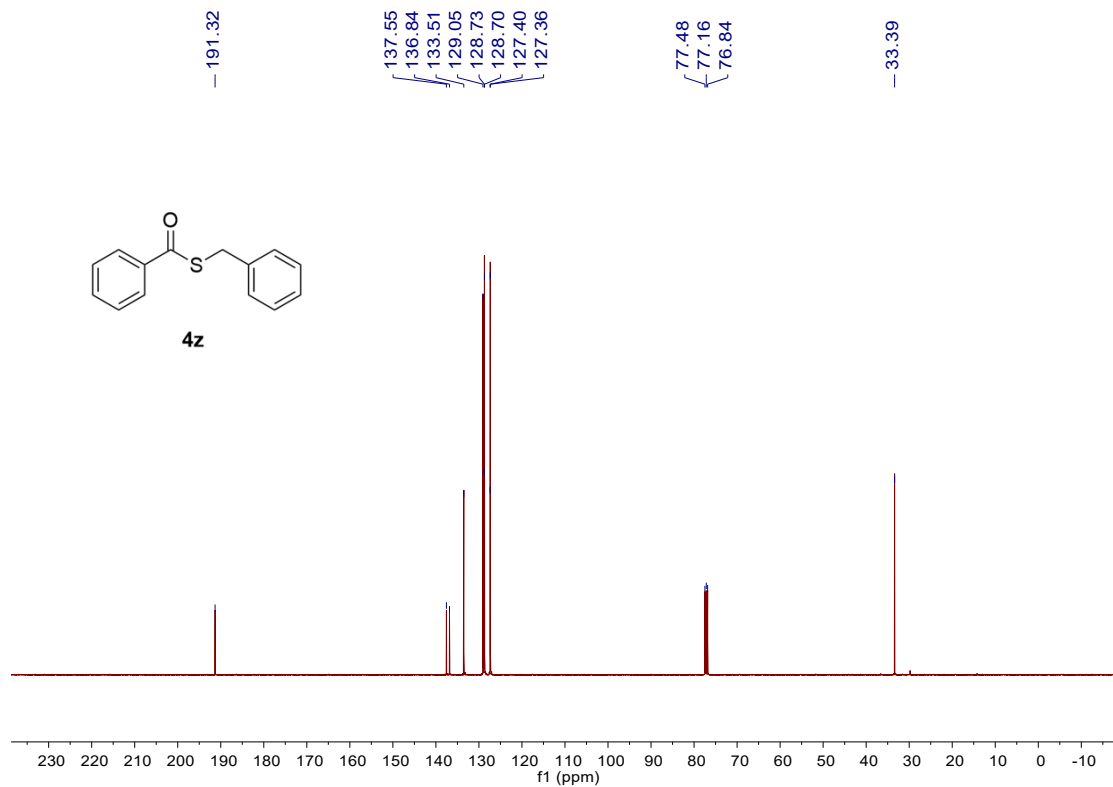

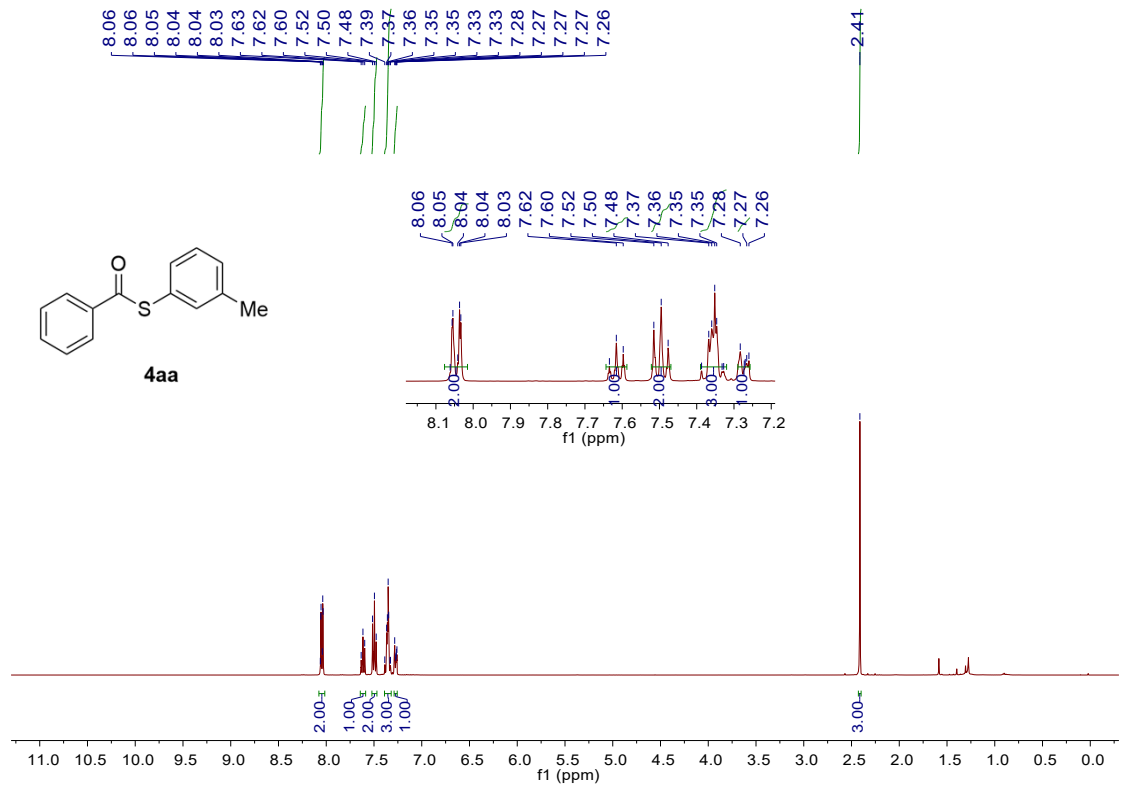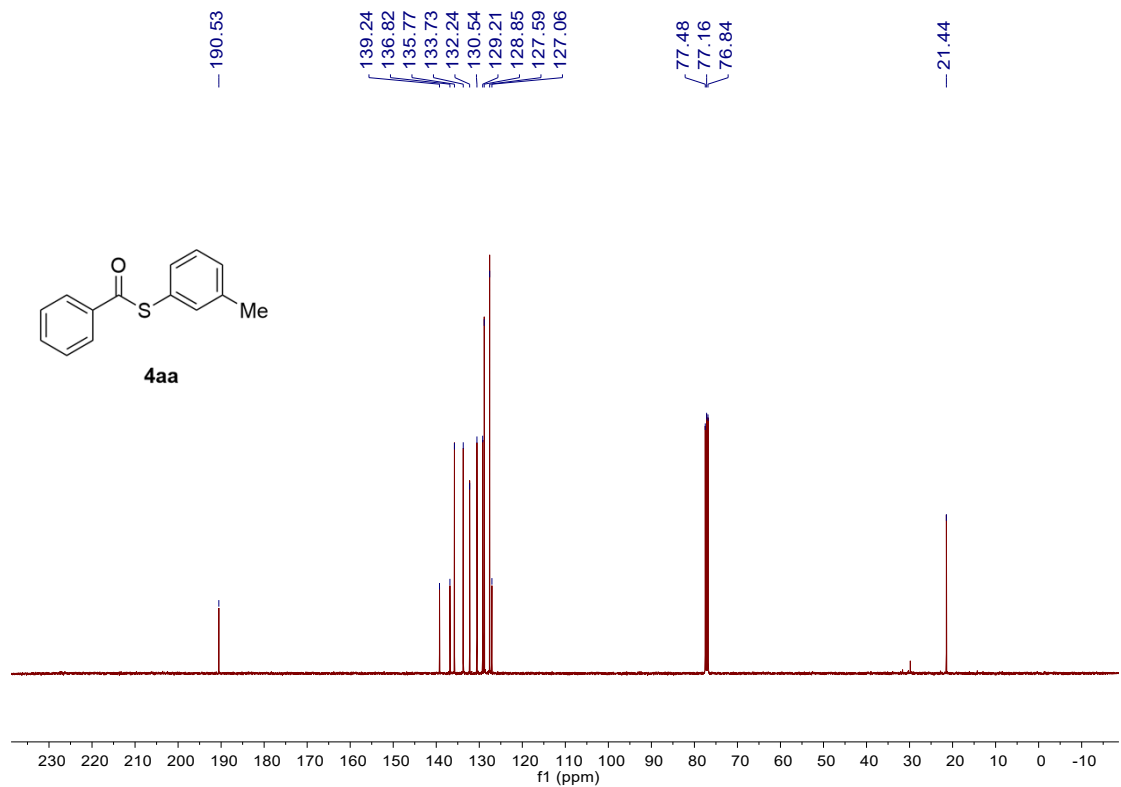

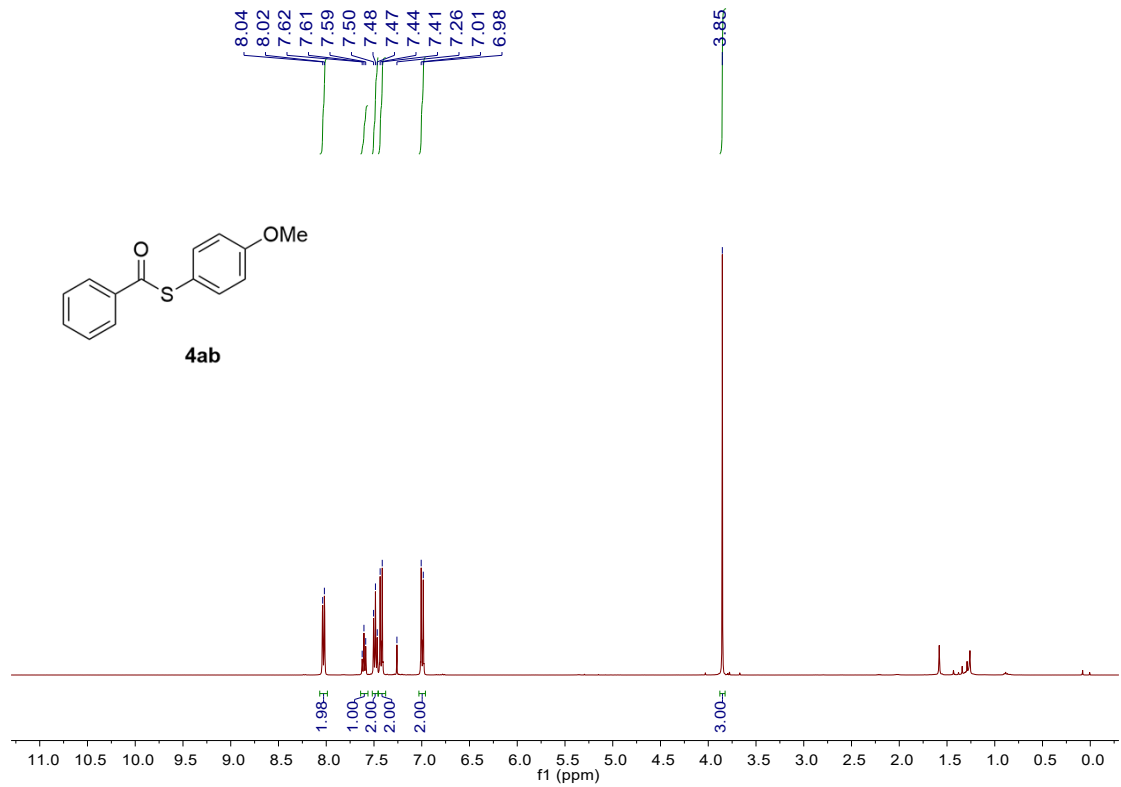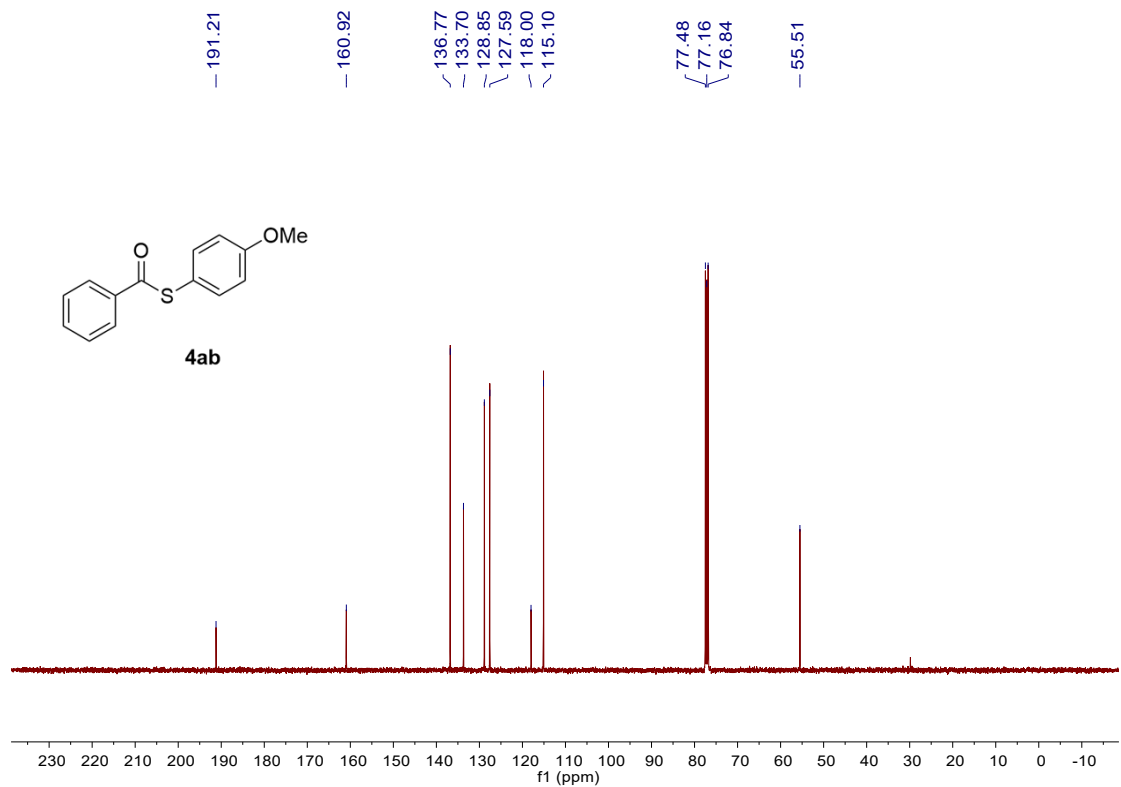



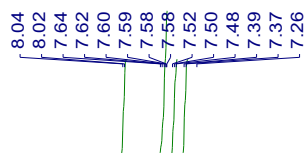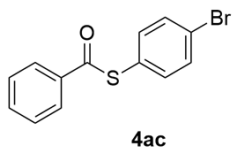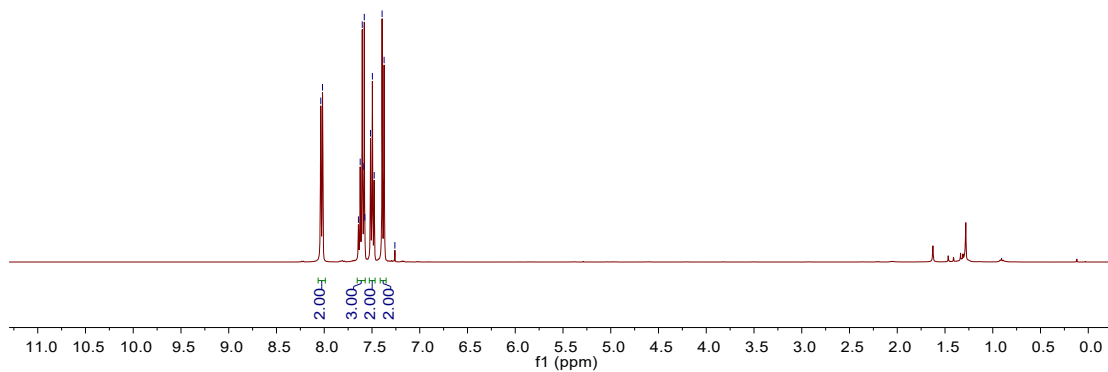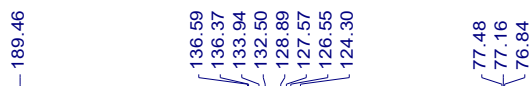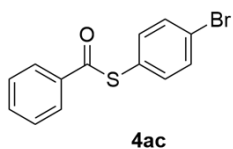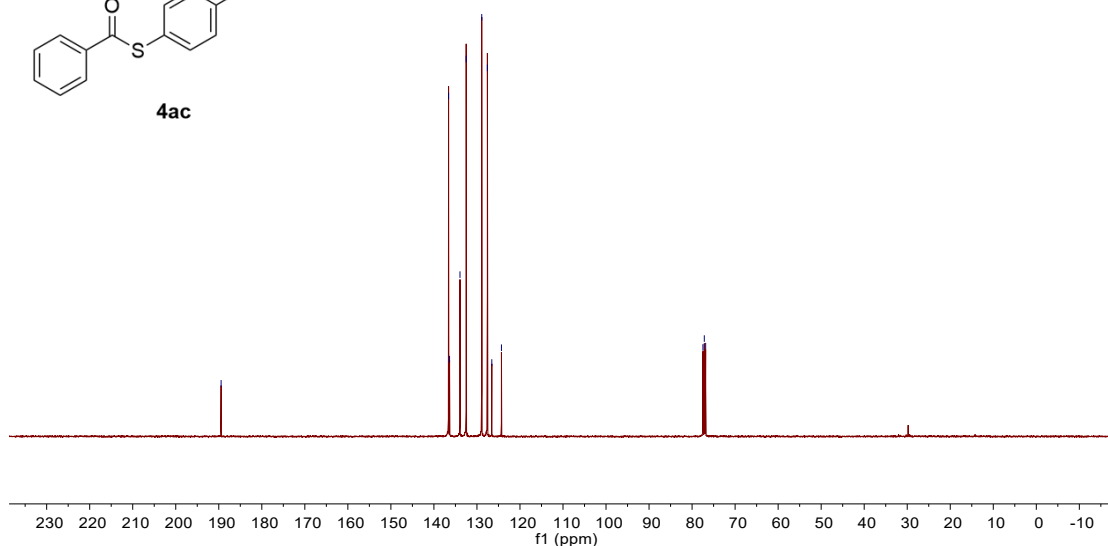

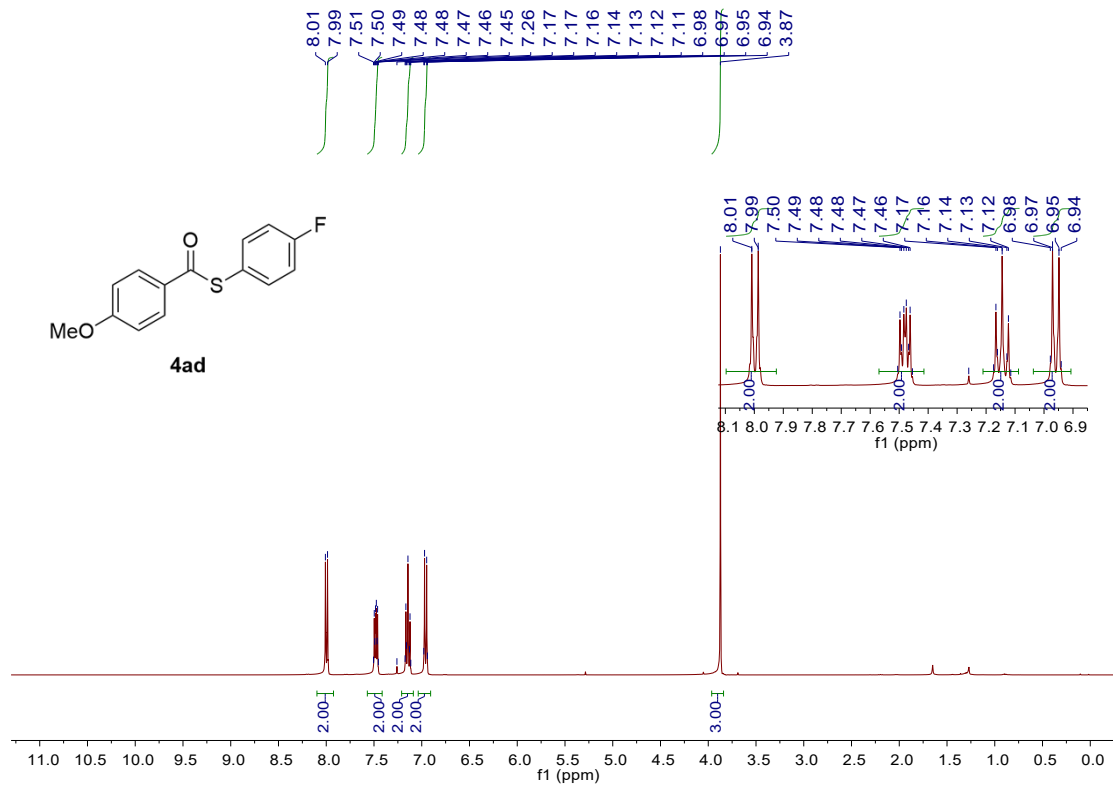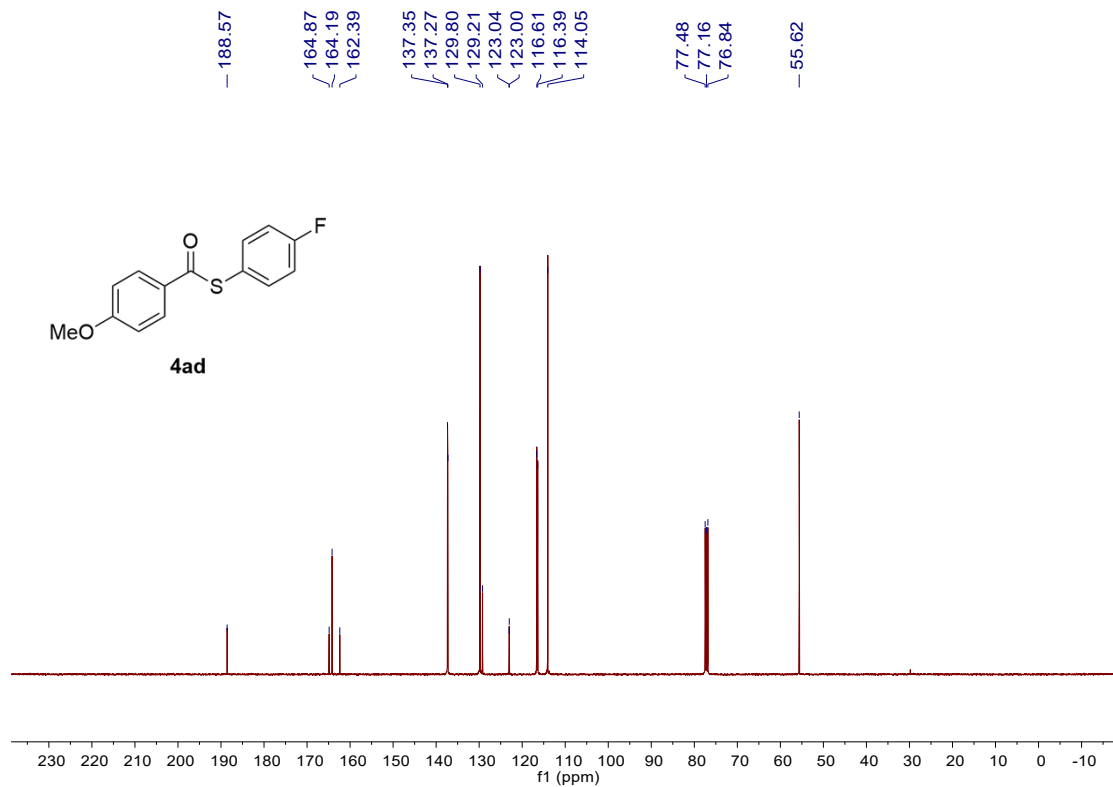

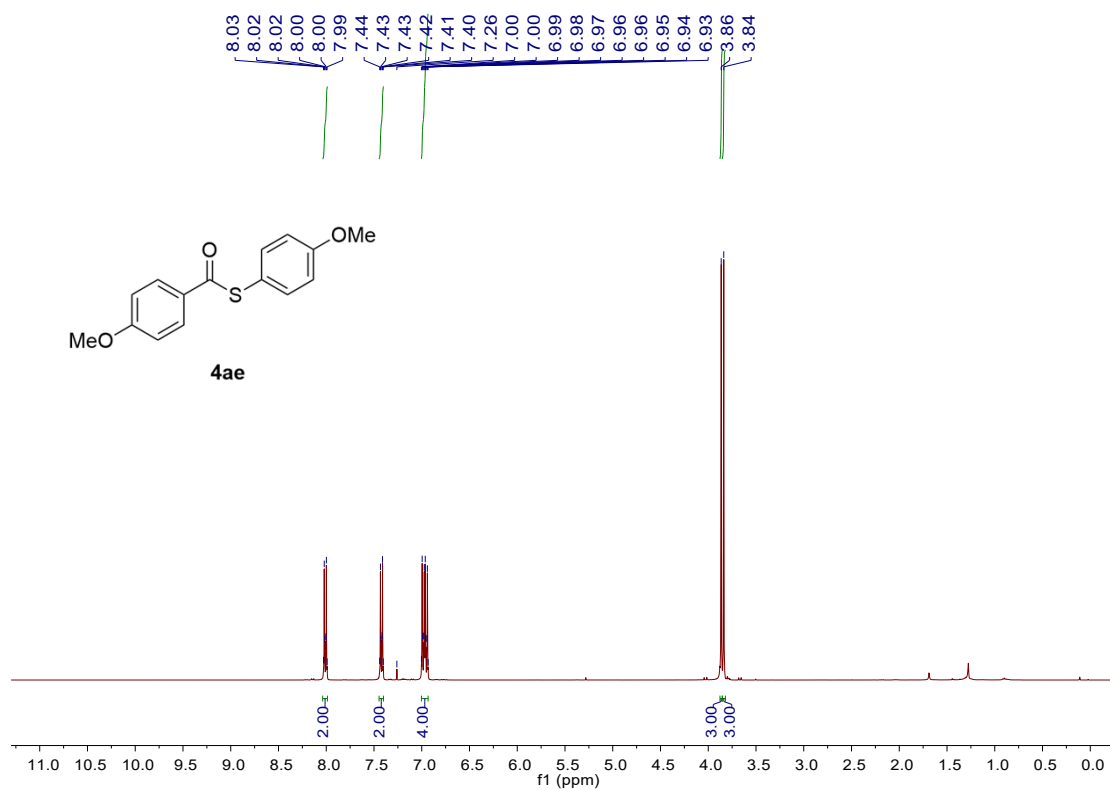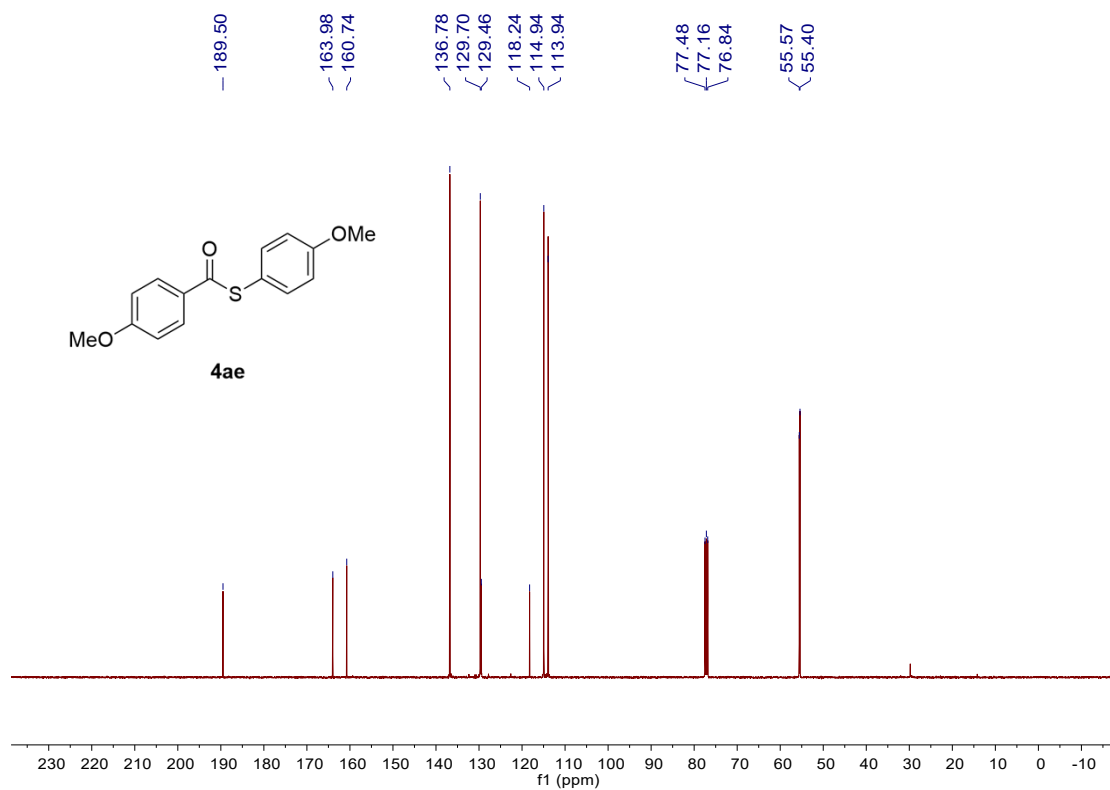

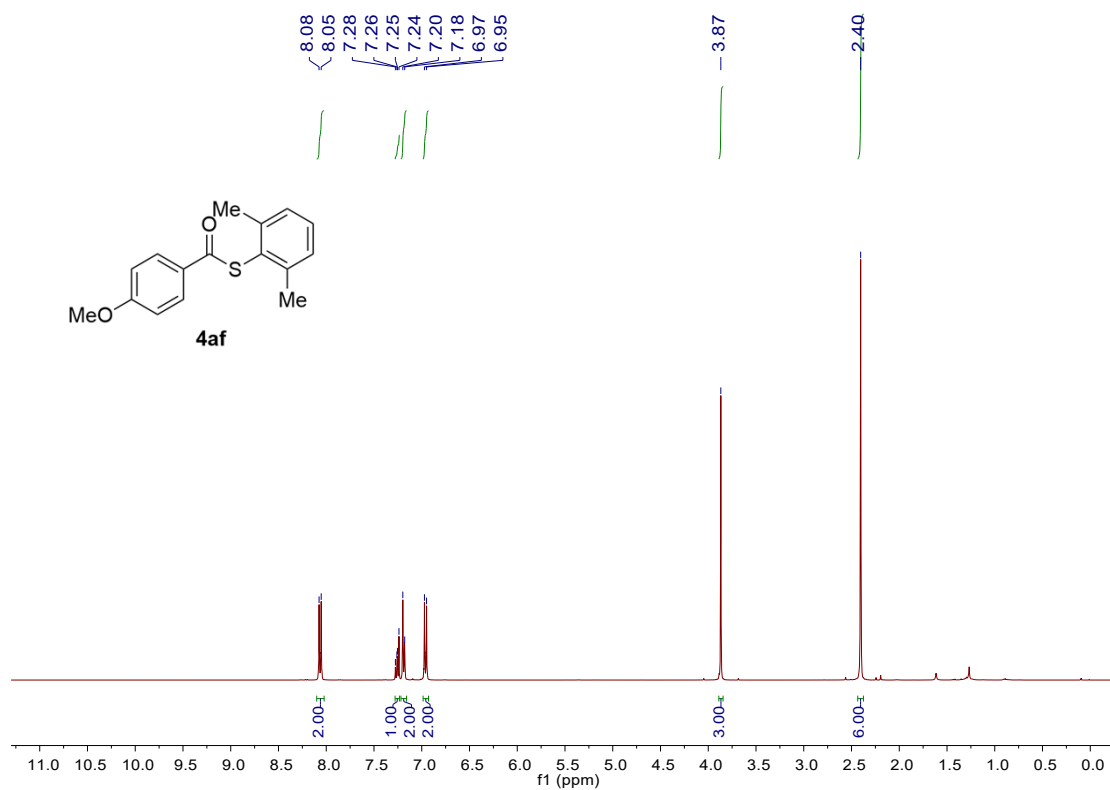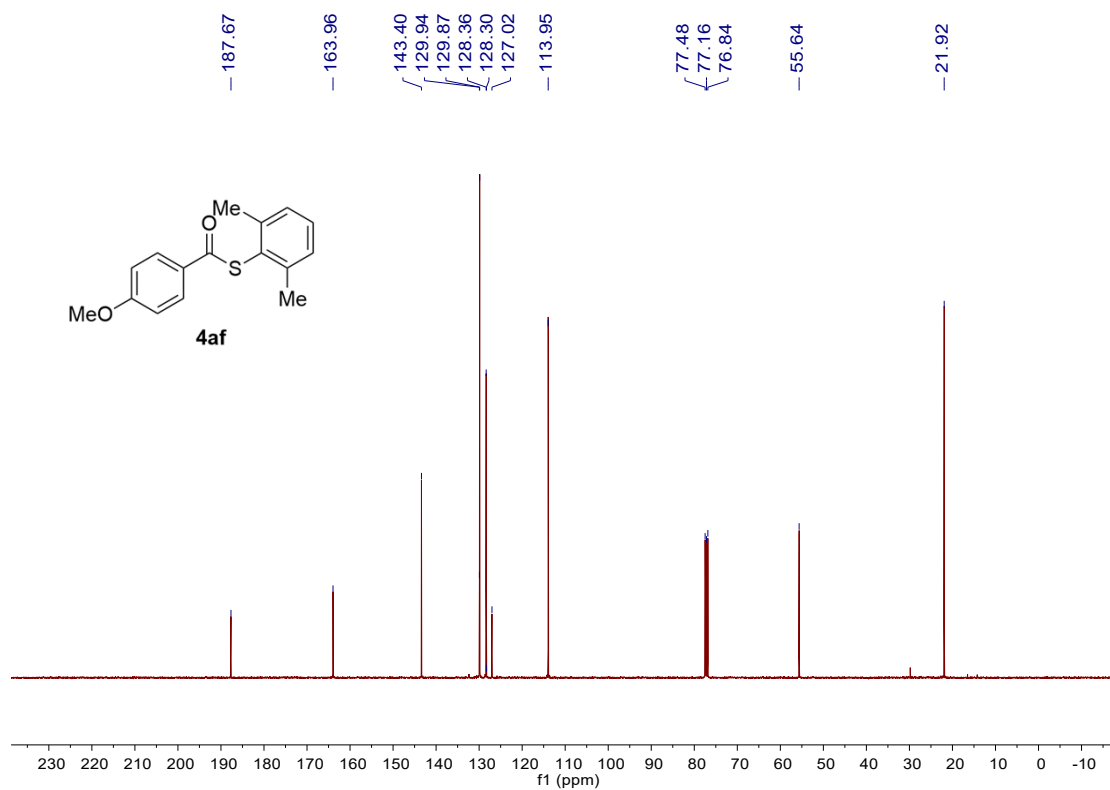

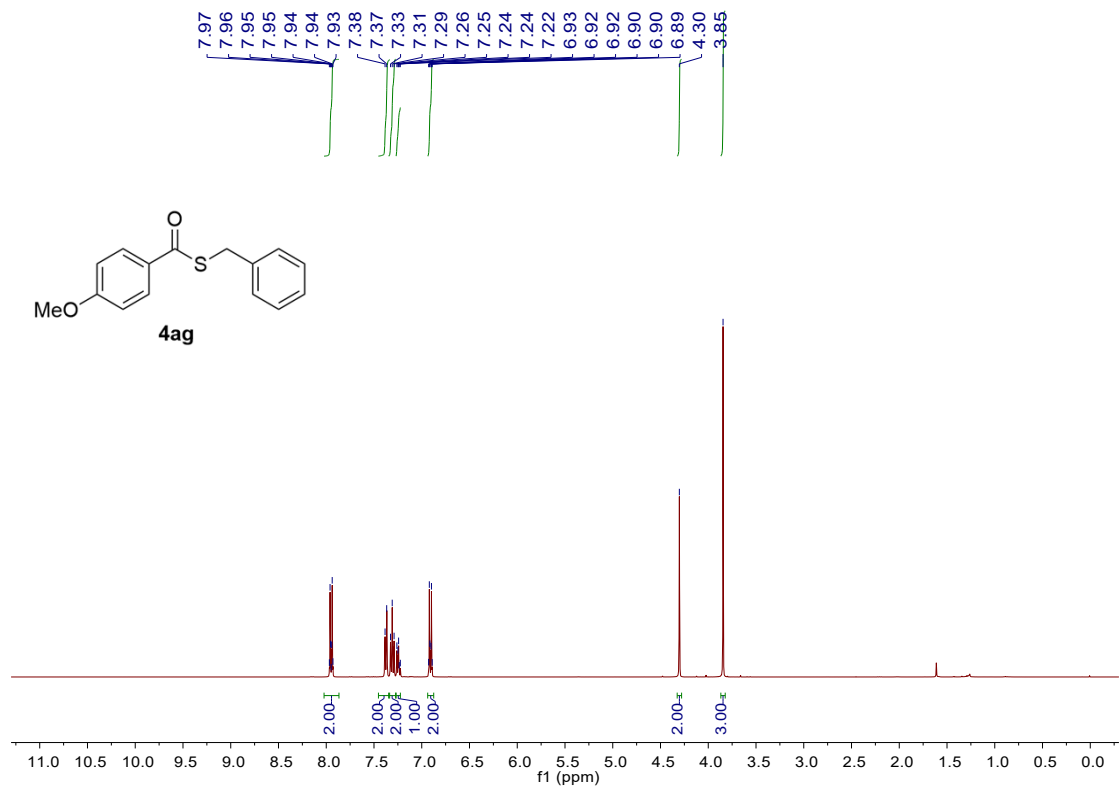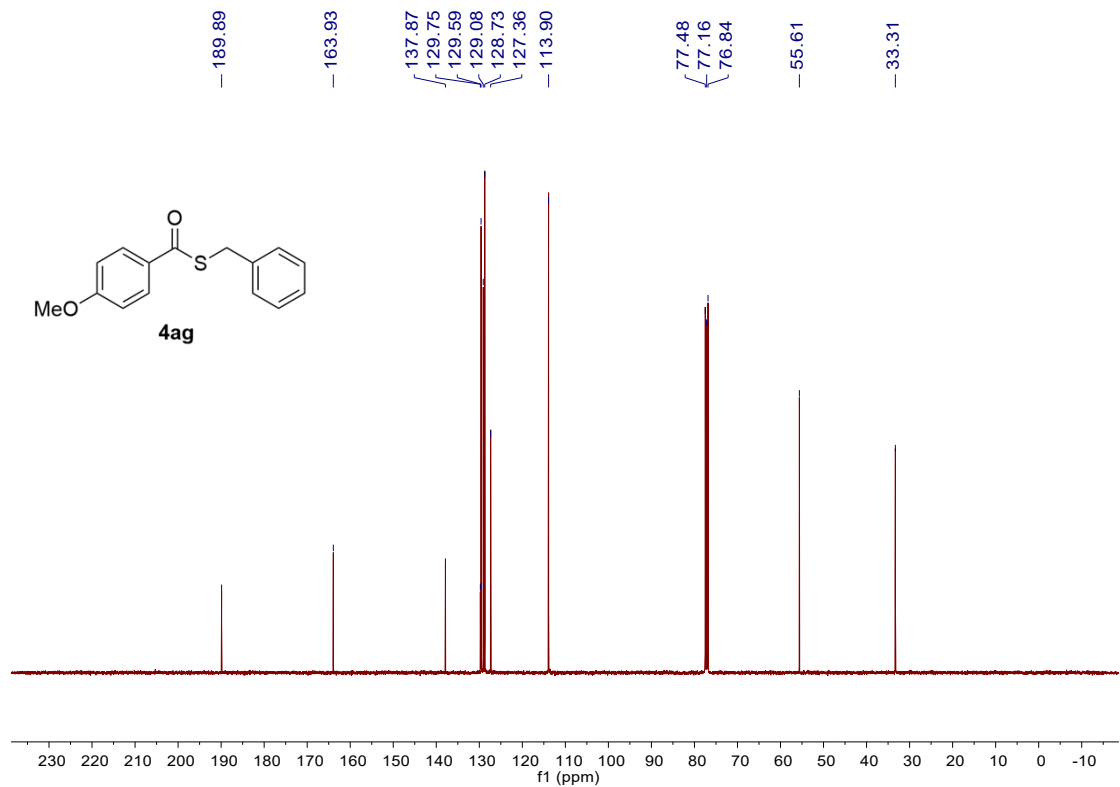

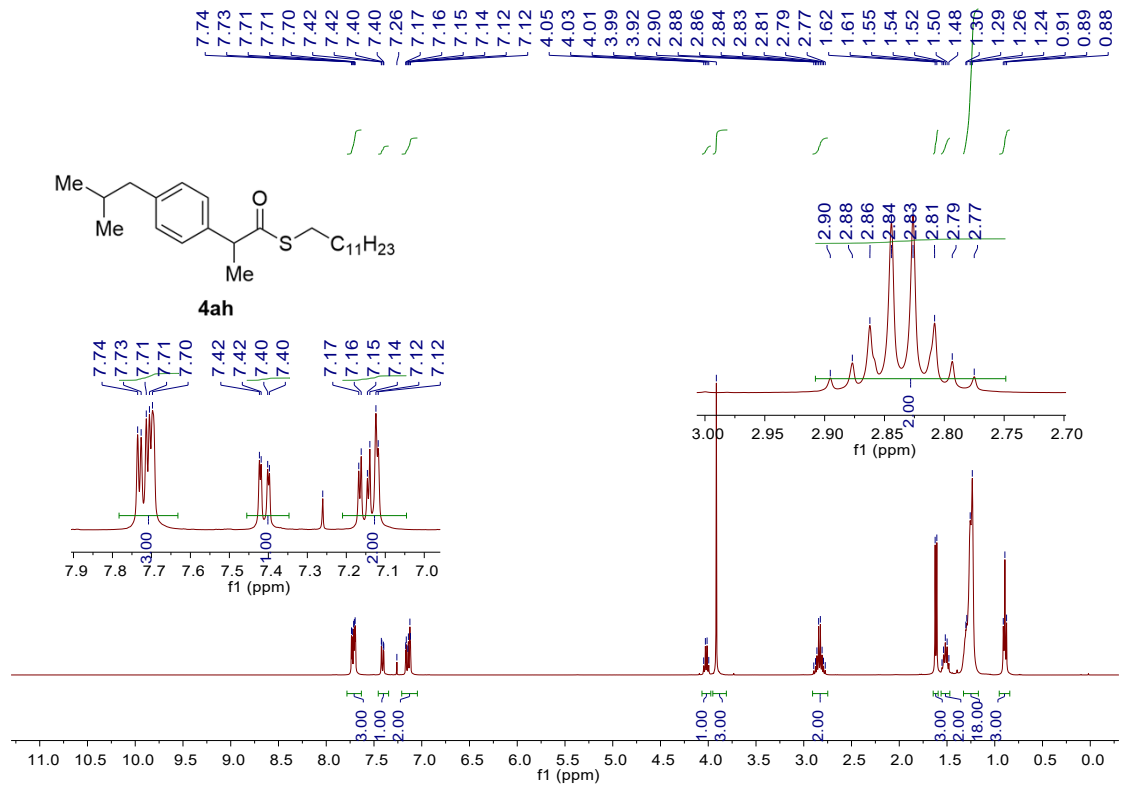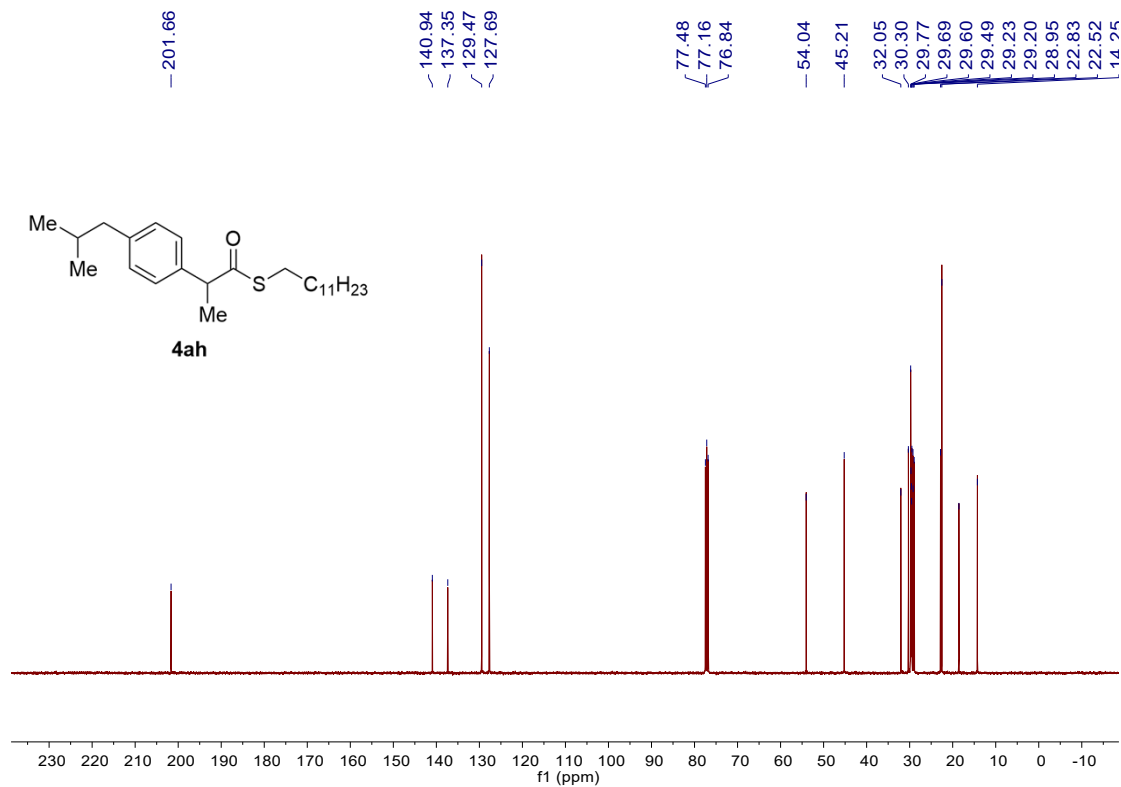

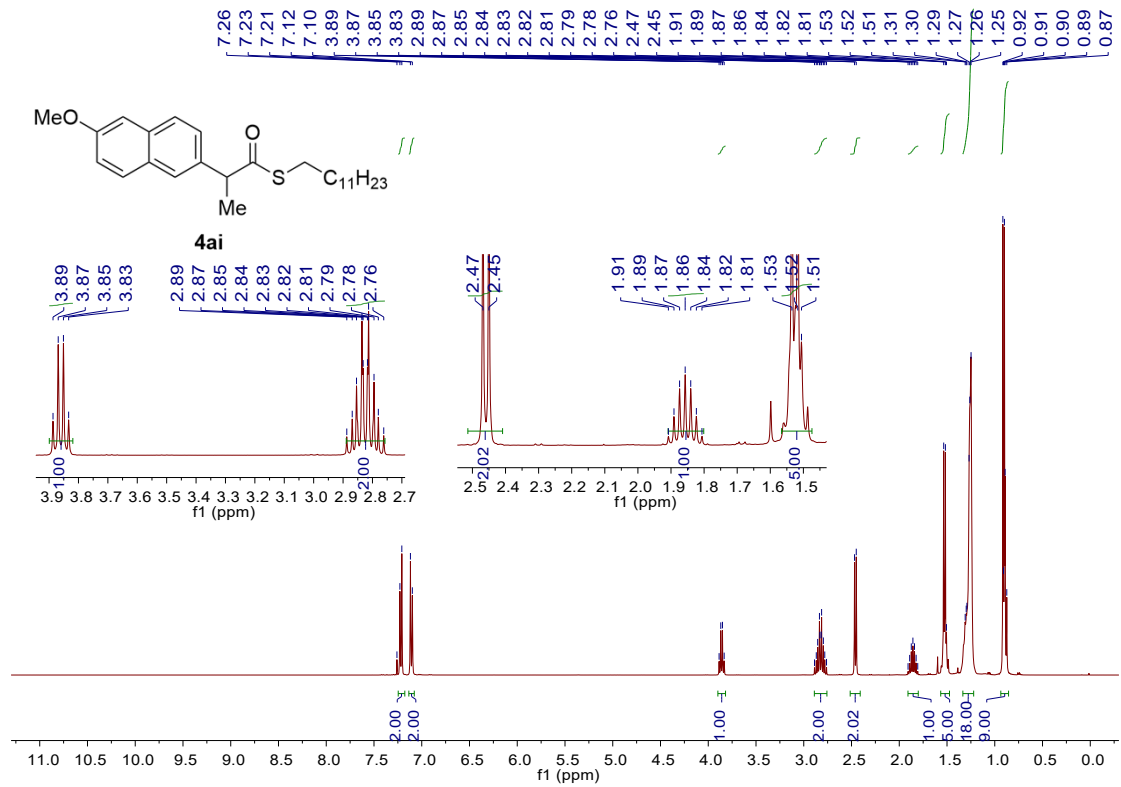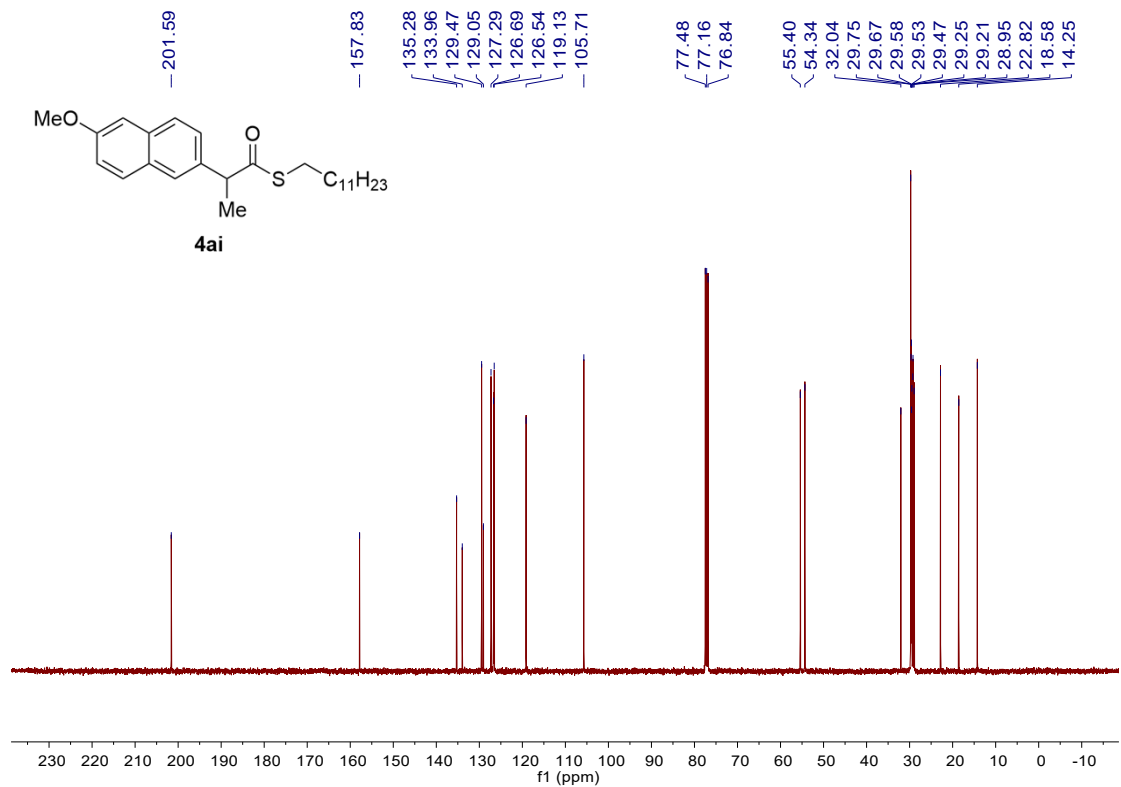

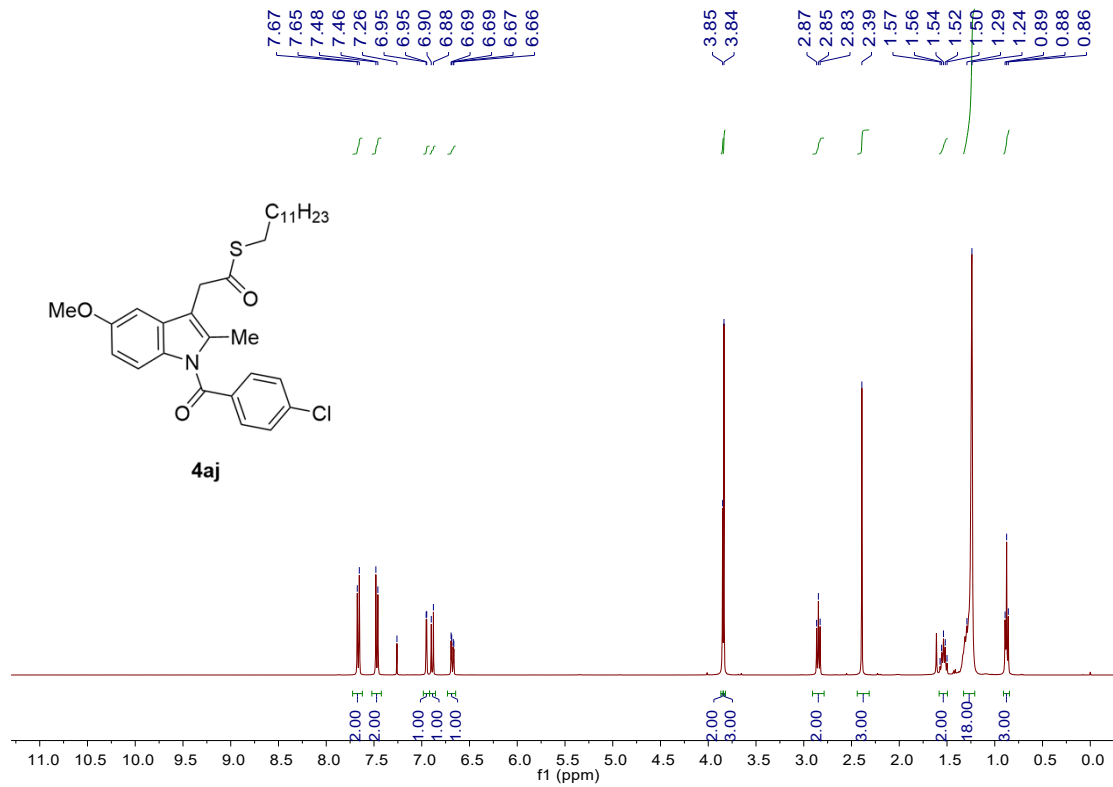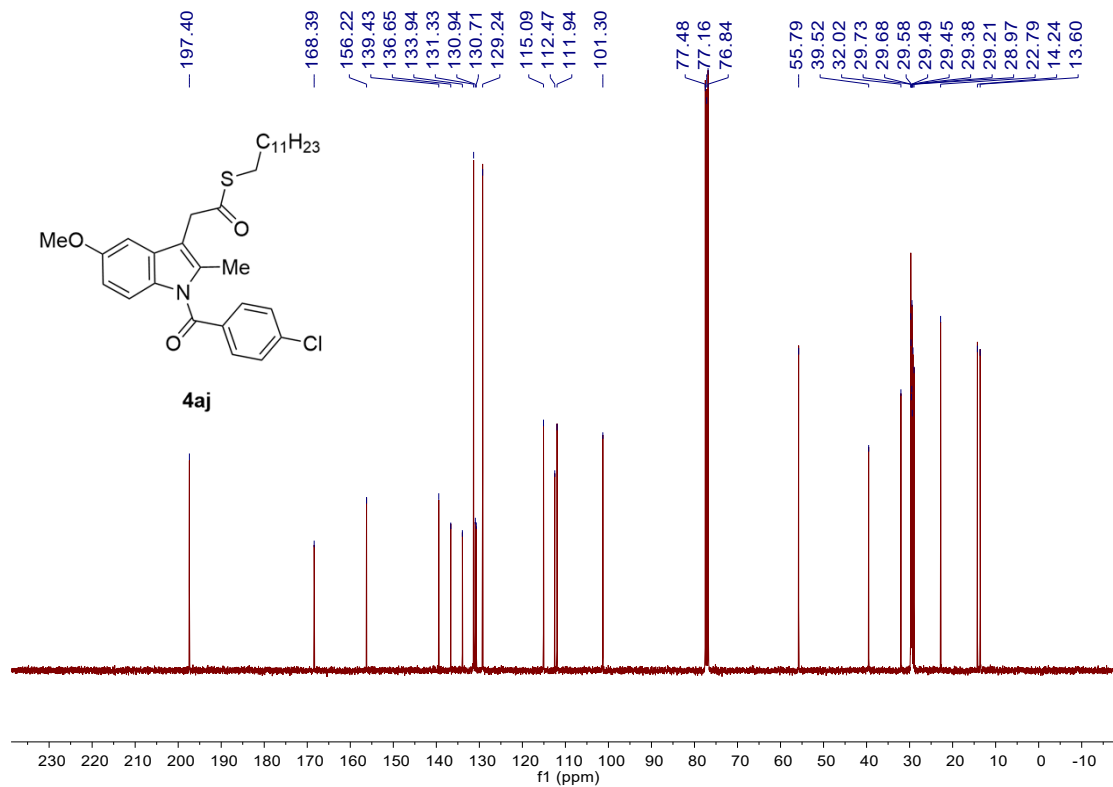



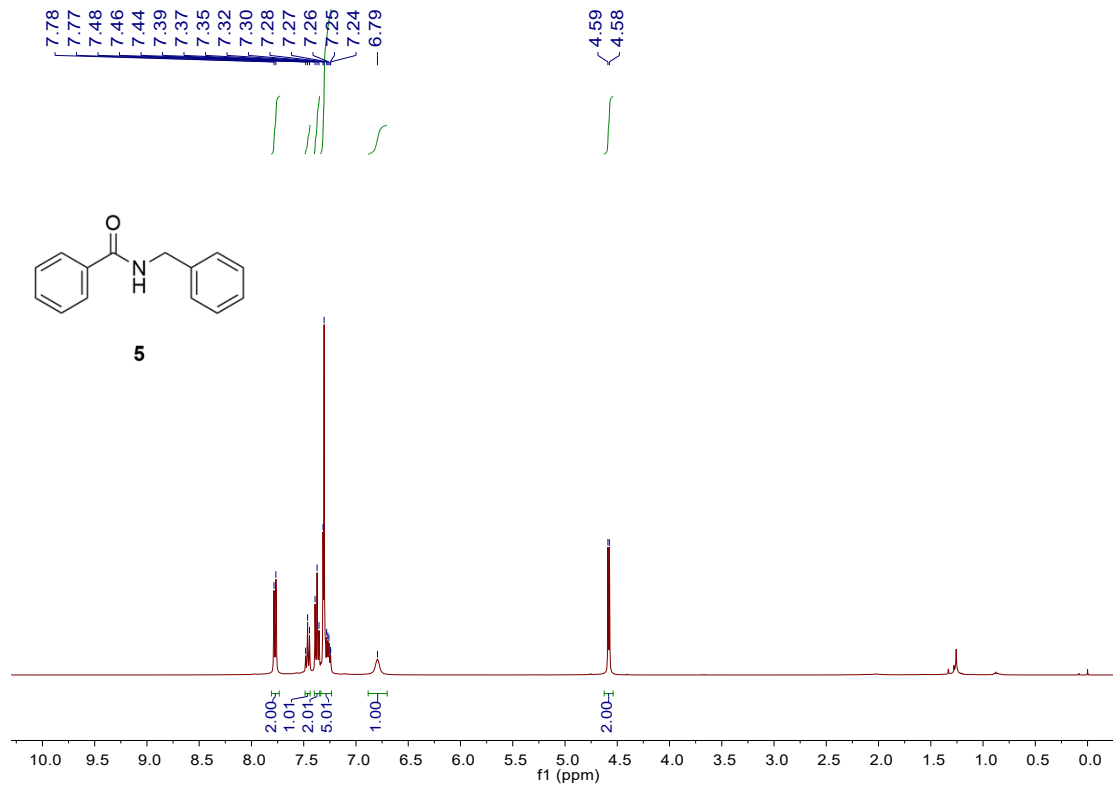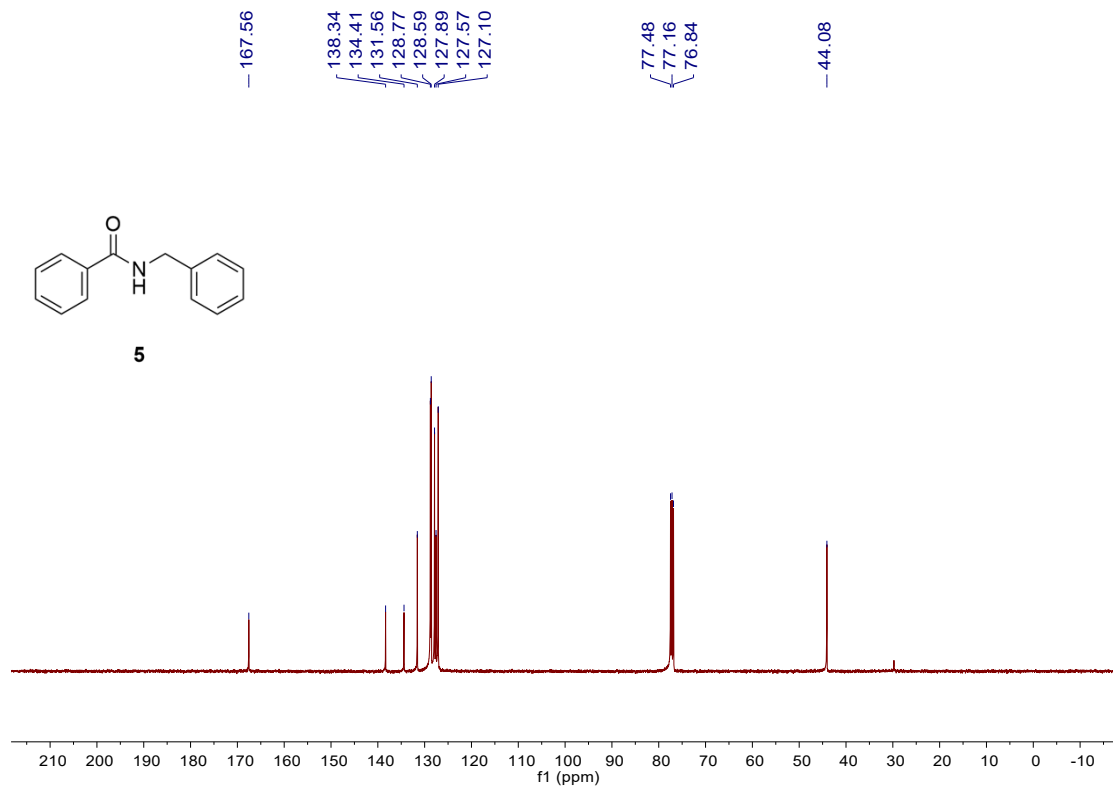

Supplement: d4cc01326c1.pdf [file d4cc01326c1.pdf]
